# Supplementary material
Source: PubMed Central journal article supplement (PMC4121362)
Supplement: epi-9-513-s01.pdf [file epi-9-513-s01.pdf]

## **Supplemental Material to:**

**Glòria Mas Martín, Devin A King, Erin M Green, Pablo E Garcia-Nieto, Richard Alexander, Sean R Collins, Nevan J Krogan, Or P Gozani, and Ashby J Morrison**

**Set5 and Set1 cooperate to repress gene expression at telomeres and retrotransposons**

**Epigenetics 2014; 9(4)**

**<http://dx.doi.org/10.4161/epi.27645>**

**[http://www.landesbioscience.com/journals/epigenetics/  
article/27645/](http://www.landesbioscience.com/journals/epigenetics/article/27645/)**

## Supplementary Figure S1

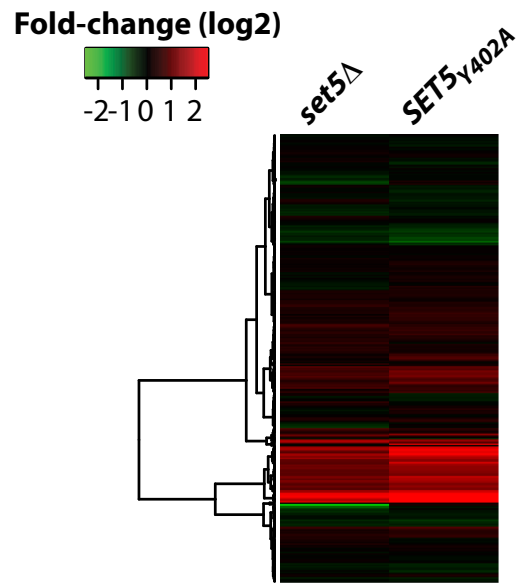

**Figure S1. The catalytic activity of Set5 is required for Set5-dependent gene repression.** Expression heatmap and hierarchical clustering was performed as described in Fig. 1B. The same 37 genes that are up-regulated in the *set5Δ* mutant compared to wild-type, are up-regulated in a mutant strain harboring a catalytic inactive allele of Set5, *SET5<sub>Y402A</sub>*, compared to its corresponding *SET5<sub>WT</sub>*.

## Supplementary Figure S2

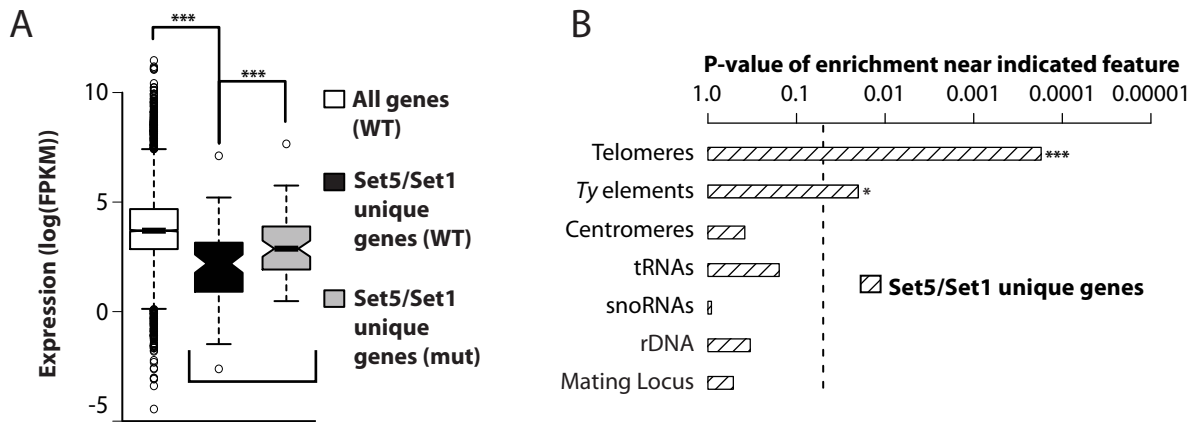

**Figure S2. The “Set5/Set1 unique” genes are lowly expressed in wildtype cells and are enriched near telomeres and Ty retrotransposons.** (A and B) Analysis of the 72 genes uniquely up-regulated in the double mutant –excluding genes also repressed in either of the single mutants– (referred to as “Set5/Set1 unique” genes) was performed as described in Fig. 1D and 1E for S2A and S2B, respectively. Dashed vertical line denotes  $p=0.05$ . P-values represent the two-sided probability value from the Wilcoxon rank sum test, \* $p < 0.05$ , \*\* $p < 0.01$ , \*\*\* $p < 0.001$ .

## Supplementary Figure S3

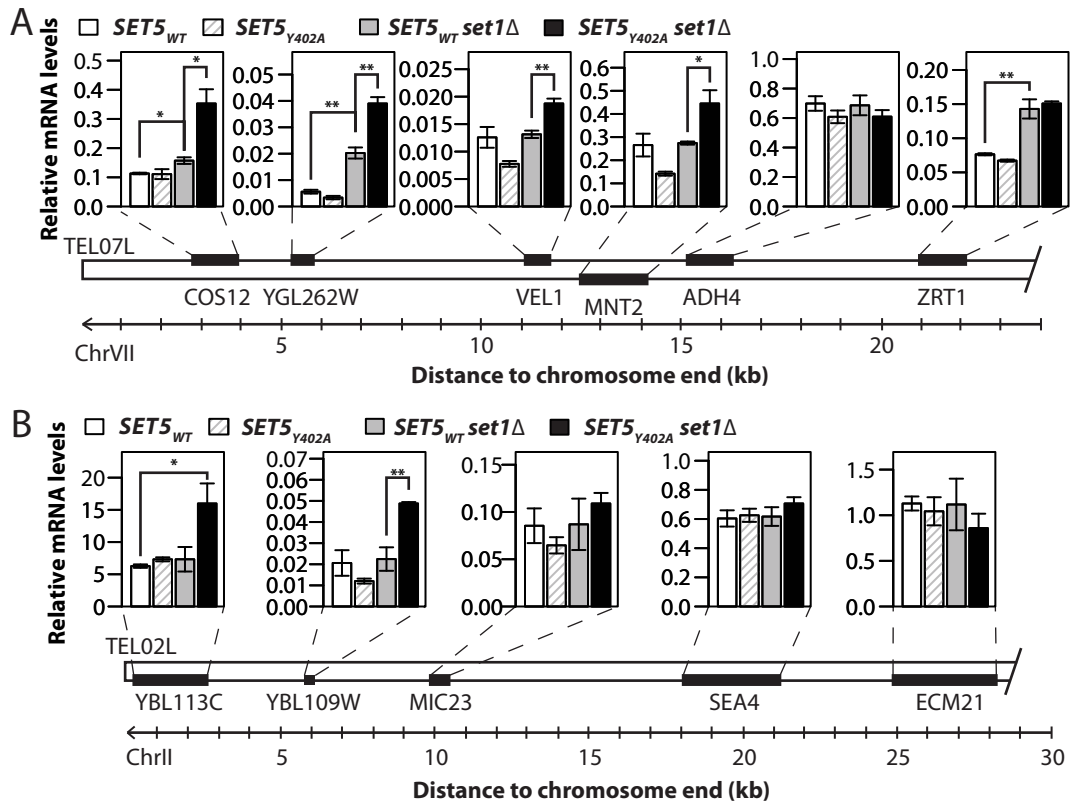

**Supplementary Figure S3. The catalytic activity of Set5 is required for *SET5*-mediated gene repression at subtelomeric regions. (A and B) qRT-PCR measurements of mRNA levels of the indicated ORFs on the left arm of chromosome VII (A) or the left arm of chromosome II (B). Relative mRNA values were calculated according to the *TFC1* reference gene, as described in Methods. Data are represented as mean  $\pm$  SEM (standard error of the mean) for 3 biological replicates, \* $p < 0.05$ , \*\* $p < 0.01$ , \*\*\* $p < 0.001$ . *SET5*<sub>Y402A</sub>, catalytic inactive mutant of Set5.**

## Supplementary Figure S4

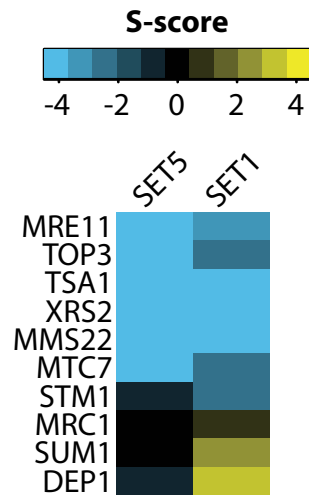

**Supplementary Figure S4. Set1 and Set5 functionally interact with factors related to telomere maintenance.** Heatmap representing all significant genetic interactions (S-scores) of *SET1-DAmP* and *set5Δ* mutants with genes involved in telomere maintenance.

## Supplementary Figure S5

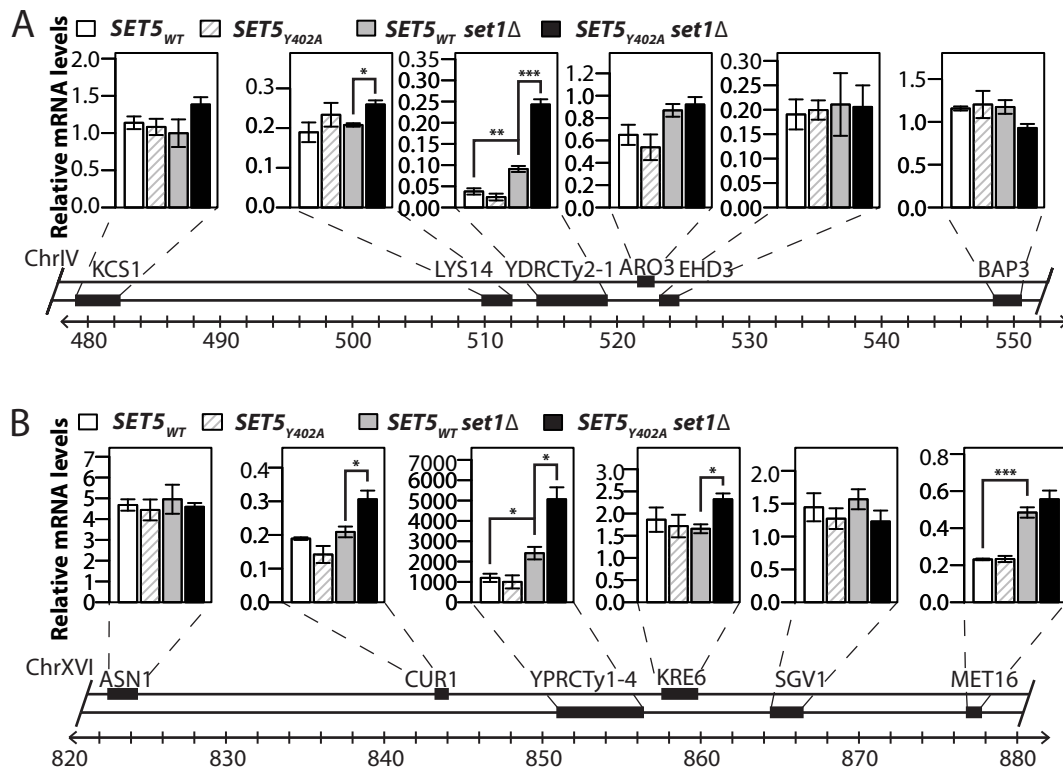

**Supplementary Figure S5. The catalytic activity of Set5 is required for *SET5*-mediated gene repression of transposable elements. (A and B) Real-time PCR measurements of mRNA levels of the indicated ORFs flanking the Ty elements YDRCTy2-1 (A) and YPRCTy1-4 (B). Relative mRNA values were calculated according to *TFC1*, as described in Methods. Data are represented as mean  $\pm$  SEM (standard error of the mean) for 3 biological replicates, \* $p < 0.05$ , \*\* $p < 0.01$ , \*\*\* $p < 0.001$ . *SET5*<sub>Y402A</sub>, catalytic inactive mutant of Set5.**

# Supplementary Figure S6

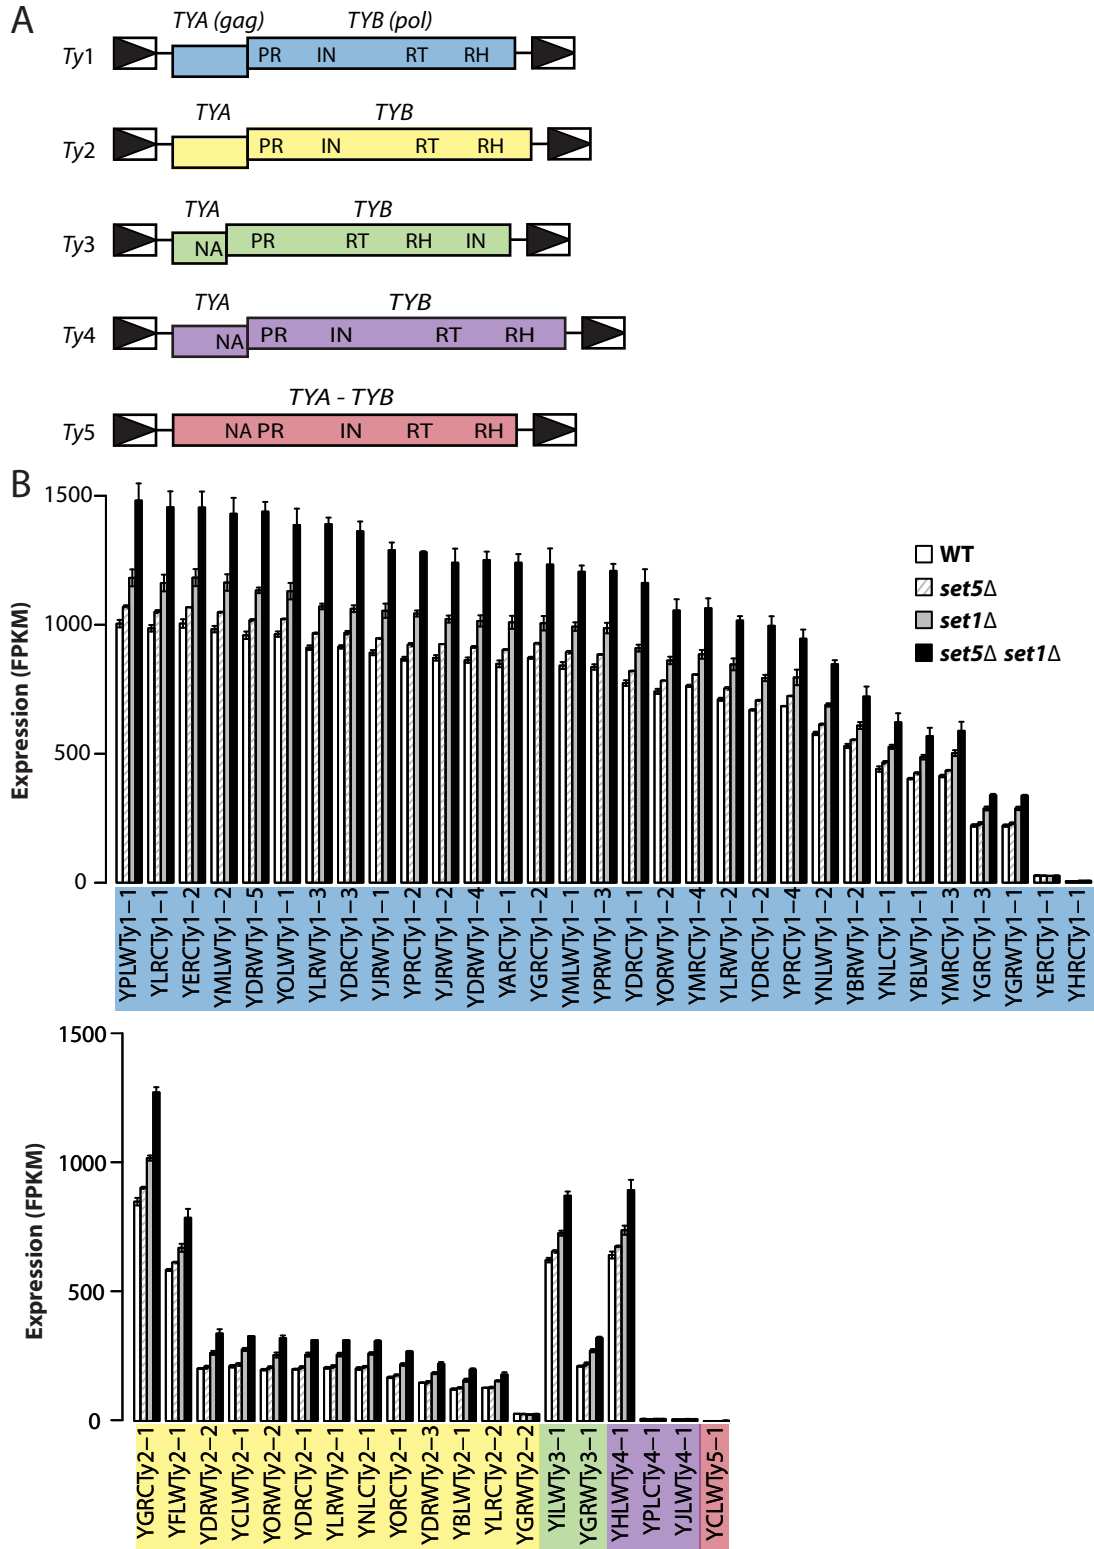

**Supplementary Figure S6. *SET5* and *SET1* deletion results in elevated expression of transposable elements.**

**(A)** Genomic structure of full-length Ty retrotransposon families currently annotated in budding yeast, classified on the basis of sequence homology (Ty1-5) is shown.<sup>1</sup> Ty1 and Ty2 families are the most abundant and highly transcribed. Full length retrotransposons are about 6 kb long and consist of two long terminal repeat sequences (LTRs, depicted as black arrows) that function as promoter and terminator, respectively, flanking a central coding region containing the TYA (*GAG*) and TYB (*POL*) genes. These genes encode proteins necessary for reverse transcription and integration of the resulting Ty cDNA into a new genomic location (PR: Protease, IN: Integrase, RT: Reverse Transcriptase, RH: RNAse H, NA: RNA binding coding domain). Schematic was adapted from ref. 2. **(B)** *SET5* and *SET1* deletion results in elevated expression of transposable elements. RNA-Seq FPKM expression of each currently annotated Ty element in the indicated wildtype (WT) and mutant strains. Each color represents one Ty family as depicted in (A).



## Supplementary Figure S7

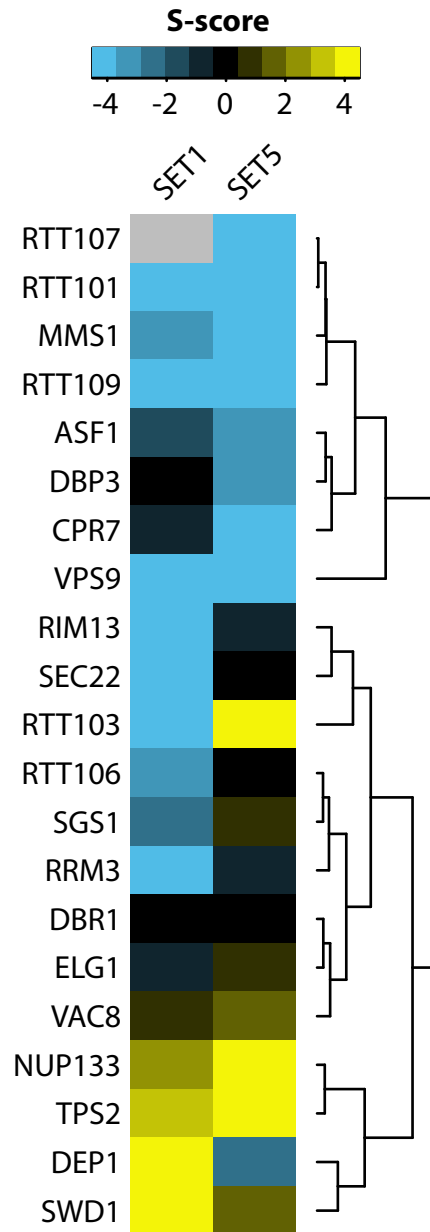

**Supplementary Figure S7. *SET1* and *SET5* have Ty retrotransposon-related genetic interactions.** Heatmap representation of E-MAP genetic interaction scores (S-scores) of both *SET1* and *SET5* with genes known to be involved in Ty element regulation.

## Supplementary Table 1

**E-MAP data.** List of processed E-MAP genetic interaction scores (S-scores) for the strains *SET5::NAT (SET5 - DEL)* and *SET1 – DAmP*. E-MAP experiments and analyses were performed as described in refs. 3 and 4. NaN represent missing values in computation.

| ORF       | Gene Name | Mutation | SET1 - DAMP | SET5 - DEL |
|-----------|-----------|----------|-------------|------------|
| YAL002W   | VPS8      | DELETION | -7.368572   | 0.270083   |
| YAL007C   | ERP2      | DELETION | -0.186821   | -0.144824  |
| YAL010C   | MDM10     | DELETION | 0.408309    | 1.309119   |
| YAL011W   | SWC3      | DELETION | -6.998205   | -0.326764  |
| YAL013W   | DEP1      | DELETION | 4.170796    | -1.256243  |
| YAL019W   | FUN30     | DELETION | 0.822687    | 0.038944   |
| YAL020C   | ATS1      | DELETION | 0.225533    | 1.151878   |
| YAL021C   | CCR4      | DELETION | -0.131788   | 1.017379   |
| YAL023C   | PMT2      | DELETION | 0.12867     | -1.163732  |
| YAL024C   | LTE1      | DELETION | -0.251343   | 0.437678   |
| YAL026C   | DRS2      | DELETION | 1.467723    | 3.112327   |
| YAL027W   | SAW1      | DELETION | 0.441614    | 0.968075   |
| YAL040C   | CLN3      | DELETION | 0.536964    | 0.61742    |
| YAL042W   | ERV46     | DELETION | -0.348864   | -0.030709  |
| YAL048C   | GEM1      | DELETION | 3.575664    | 1.795677   |
| YAL051W   | OAF1      | DELETION | -0.149448   | -0.876834  |
| YAL053W   | FLC2      | DELETION | 0.440837    | -3.543995  |
| YAL055W   | PEX22     | DELETION | 2.301246    | 0.116533   |
| YAR002C-A | ERP1      | DELETION | -0.650772   | -0.048431  |
| YAR002W   | NUP60     | DELETION | NaN         | NaN        |
| YAR003W   | SWD1      | DELETION | 4.495931    | 0.756593   |
| YAR014C   | BUD14     | DELETION | -1.68551    | -2.85529   |
| YAR018C   | KIN3      | DELETION | -3.040251   | -0.573017  |
| YBL007C   | SLA1      | DELETION | 1.708576    | -3.037011  |
| YBL008W   | HIR1      | DELETION | -0.093822   | -1.125041  |
| YBL011W   | SCT1      | DELETION | -0.187537   | -1.113733  |
| YBL016W   | FUS3      | DELETION | NaN         | NaN        |
| YBL017C   | PEP1      | DELETION | -0.61843    | -0.318619  |
| YBL021C   | HAP3      | DELETION | -0.869304   | -1.257147  |
| YBL024W   | NCL1      | DELETION | 0.288603    | -0.93947   |
| YBL025W   | RRN10     | DELETION | NaN         | NaN        |
| YBL027W   | RPL19B    | DELETION | -1.735227   | 1.787424   |
| YBL032W   | HEK2      | DELETION | -1.154873   | -0.539002  |
| YBL036C   | YBL036C   | DELETION | -0.205666   | -0.726365  |
| YBL046W   | PSY4      | DELETION | 0.174643    | -1.165753  |
| YBL047C   | EDE1      | DELETION | 2.169031    | 0.320927   |

|           |         |          |           |           |
|-----------|---------|----------|-----------|-----------|
| YBL051C   | PIN4    | DELETION | 0.469301  | 0.137317  |
| YBL052C   | SAS3    | DELETION | -1.034478 | 0.418459  |
| YBL058W   | SHP1    | DELETION | 2.503552  | 0.968004  |
| YBL061C   | SKT5    | DELETION | 1.322112  | -4.346532 |
| YBL066C   | SEF1    | DELETION | 0.874461  | -0.653016 |
| YBL067C   | UBP13   | DELETION | -4.001988 | 0.29759   |
| YBL072C   | RPS8A   | DELETION | 2.522455  | -0.636136 |
| YBL075C   | SSA3    | DELETION | 0.601851  | -1.039212 |
| YBL078C   | ATG8    | DELETION | 0.655448  | 2.218412  |
| YBL079W   | NUP170  | DELETION | -0.275742 | 1.638771  |
| YBL081W   | YBL081W | DELETION | -3.875693 | -0.522871 |
| YBL082C   | ALG3    | DELETION | 1.293472  | -0.413497 |
| YBL084C   | CDC27   | DAmP     | NaN       | NaN       |
| YBL085W   | BOI1    | DELETION | 0.114988  | -0.110372 |
| YBL086C   | YBL086C | DELETION | 0.50238   | -0.885276 |
| YBL087C   | RPL23A  | DELETION | 0.530242  | -0.565567 |
| YBL088C   | TEL1    | DELETION | -0.160007 | -1.030484 |
| YBL093C   | ROX3    | DELETION | NaN       | NaN       |
| YBL101C   | ECM21   | DELETION | 1.700162  | 0.276439  |
| YBL103C   | RTG3    | DELETION | -3.448986 | -1.811428 |
| YBR009C   | HHF1    | DELETION | 0.691433  | -2.732609 |
| YBR010W   | HHT1    | DELETION | 0.614709  | -0.463546 |
| YBR015C   | MNN2    | DELETION | 0.430822  | -1.641189 |
| YBR022W   | POA1    | DELETION | -0.181743 | -0.305869 |
| YBR023C   | CHS3    | DELETION | -0.181872 | -0.625527 |
| YBR025C   | OLA1    | DELETION | -1.953429 | -2.058175 |
| YBR031W   | RPL4A   | DELETION | 1.729886  | 1.459146  |
| YBR034C   | HMT1    | DELETION | 0.588568  | 0.64419   |
| YBR036C   | CSG2    | DELETION | -5.212202 | NaN       |
| YBR041W   | FAT1    | DELETION | -1.013158 | -1.057496 |
| YBR057C   | MUM2    | DELETION | 0.046489  | -0.680005 |
| YBR058C   | UBP14   | DELETION | -3.74848  | 0.138597  |
| YBR061C   | TRM7    | DELETION | -0.758547 | -0.186506 |
| YBR065C   | ECM2    | DELETION | -0.823287 | -0.100063 |
| YBR069C   | TAT1    | DELETION | 0.580636  | -1.360636 |
| YBR073W   | RDH54   | DELETION | -1.509133 | -0.21186  |
| YBR076W   | ECM8    | DELETION | -0.069363 | -0.526426 |
| YBR078W   | ECM33   | DELETION | -0.496154 | 0.713354  |
| YBR081C   | SPT7    | DELETION | NaN       | -1.275986 |
| YBR082C   | UBC4    | DELETION | 0.019641  | 0.409599  |
| YBR083W   | TEC1    | DELETION | 1.197943  | -0.197617 |
| YBR084C-A | RPL19A  | DELETION | -0.83982  | 0.413422  |
| YBR088C   | POL30   | DAmP     | NaN       | NaN       |
| YBR093C   | PHO5    | DELETION | 0.220828  | 1.292329  |
| YBR094W   | PBY1    | DELETION | -2.695629 | -3.225936 |
| YBR095C   | RXT2    | DELETION | -5.329354 | 0.946835  |
| YBR098W   | MMS4    | DELETION | 0.52802   | 0.149834  |

|           |         |          |           |           |
|-----------|---------|----------|-----------|-----------|
| YBR103W   | SIF2    | DELETION | -4.182633 | 0.720987  |
| YBR106W   | PHO88   | DELETION | -0.386128 | -0.780787 |
| YBR107C   | IML3    | DELETION | -0.315067 | 1.384893  |
| YBR108W   | AIM3    | DELETION | 0.934884  | -0.364524 |
| YBR112C   | CYC8    | DELETION | 0.51856   | -0.423327 |
| YBR114W   | RAD16   | DELETION | 0.785193  | 0.176116  |
| YBR119W   | MUD1    | DELETION | 0.381056  | -0.73191  |
| YBR122C   | MRPL36  | DELETION | 0.467034  | -0.250314 |
| YBR125C   | PTC4    | DELETION | -0.313361 | 0.455216  |
| YBR126C   | TPS1    | DELETION | -3.880945 | 1.391521  |
| YBR131W   | CCZ1    | DELETION | -0.128137 | 0.499749  |
| YBR132C   | AGP2    | DELETION | 0.897192  | -0.125882 |
| YBR135W   | CKS1    | DAmP     | NaN       | NaN       |
| YBR141C   | YBR141C | DELETION | -0.431268 | -1.122421 |
| YBR150C   | TBS1    | DELETION | 0.234002  | -1.064974 |
| YBR154C   | RPB5    | DAmP     | NaN       | NaN       |
| YBR156C   | SLI15   | DELETION | 0.758738  | -0.426551 |
| YBR159W   | IFA38   | DELETION | 0.103409  | 0.248866  |
| YBR160W   | CDC28   | DAmP     | NaN       | NaN       |
| YBR162C   | TOS1    | DELETION | -0.81894  | 0.249757  |
| YBR162W-A | YSY6    | DELETION | 0.013933  | -1.511416 |
| YBR164C   | ARL1    | DELETION | 0.152789  | 0.714475  |
| YBR166C   | TYR1    | DELETION | 0.398881  | 0.346804  |
| YBR168W   | PEX32   | DELETION | -8.167176 | 1.113697  |
| YBR170C   | NPL4    | DELETION | 0.351929  | 0.74354   |
| YBR171W   | SEC66   | DELETION | 0.725003  | -0.694269 |
| YBR175W   | SWD3    | DELETION | 4.004935  | 0.404259  |
| YBR181C   | RPS6B   | DELETION | 0.994395  | -2.748882 |
| YBR186W   | PCH2    | DELETION | -0.173788 | -0.918068 |
| YBR193C   | MED8    | DAmP     | NaN       | NaN       |
| YBR194W   | AIM4    | DELETION | 1.058607  | 0.749276  |
| YBR195C   | MSI1    | DELETION | -2.453971 | -0.347648 |
| YBR200W   | BEM1    | DELETION | -4.186118 | -1.157074 |
| YBR201W   | DER1    | DELETION | -0.855966 | -0.026528 |
| YBR212W   | NGR1    | DELETION | NaN       | NaN       |
| YBR215W   | HPC2    | DELETION | -3.133268 | -0.199085 |
| YBR221C   | PDB1    | DELETION | 1.64224   | 0.706163  |
| YBR223C   | TDP1    | DELETION | 0.799041  | 0.331254  |
| YBR228W   | SLX1    | DELETION | 1.590674  | 0.38631   |
| YBR229C   | ROT2    | DELETION | 0.96234   | -2.89132  |
| YBR231C   | SWC5    | DELETION | NaN       | NaN       |
| YBR238C   | YBR238C | DELETION | NaN       | NaN       |
| YBR245C   | ISW1    | DELETION | 1.848147  | -0.175304 |
| YBR255W   | MTC4    | DELETION | -2.601813 | -0.524355 |
| YBR260C   | RGD1    | DELETION | -0.22996  | 0.709282  |
| YBR266C   | SLM6    | DELETION | NaN       | NaN       |
| YBR269C   | FMP21   | DELETION | -0.118714 | 1.158121  |

|           |           |                   |           |           |
|-----------|-----------|-------------------|-----------|-----------|
| YBR270C   | BIT2      | DELETION          | 0.614292  | -0.772633 |
| YBR272C   | HSM3      | DELETION          | 0.658769  | -1.37314  |
| YBR273C   | UBX7      | DELETION          | -0.749173 | 0.100534  |
| YBR274W   | CHK1      | DELETION          | -0.280251 | -0.577538 |
| YBR275C   | RIF1      | DELETION          | -0.259346 | -0.091834 |
| YBR278W   | DPB3      | DELETION          | -0.383342 | 0.897929  |
| YBR280C   | SAF1      | DELETION          | 1.157036  | -0.413569 |
| YBR281C   | DUG2      | DELETION          | 0.176939  | 0.017129  |
| YBR283C   | SSH1      | DELETION          | -0.48731  | 1.311304  |
| YBR286W   | APE3      | DELETION          | 0.589449  | 1.037554  |
| YBR288C   | APM3      | DELETION          | -0.862264 | 0.302198  |
| YBR289W   | SNF5      | DELETION          | NaN       | NaN       |
| YBR290W   | BSD2      | DELETION          | 0.101545  | 0.543117  |
| YBR291C   | CTP1      | DELETION          | -0.245572 | -0.430021 |
| YBR295W   | PCA1      | DELETION          | 0.508254  | 0.572518  |
| YBR298C   | MAL31     | DELETION          | 0.918211  | 0.134083  |
| YCL001W   | RER1      | DELETION          | -0.367849 | -3.290646 |
| YCL001W-A | YCL001W-A | DELETION          | 0.052978  | -0.117783 |
| YCL008C   | STP22     | DELETION          | NaN       | -1.415002 |
| YCL010C   | SGF29     | DELETION          | 4.671651  | 0.121097  |
| YCL011C   | GBP2      | DELETION          | 0.378124  | -0.603737 |
| YCL014W   | BUD3      | DELETION          | 0.232232  | -0.32153  |
| YCL016C   | DCC1      | DELETION          | -3.796429 | -0.143772 |
| YCL018W   | WT_LEU2   | WT_leu2D::KAN-GFP | NaN       | NaN       |
| YCL018W   | WT_LEU2   | WT_leu2D::KAN-GFP | NaN       | NaN       |
| YCL029C   | BIK1      | DELETION          | -0.009228 | 1.263105  |
| YCL032W   | STE50     | DELETION          | NaN       | 5.167896  |
| YCL033C   | MXR2      | DELETION          | NaN       | NaN       |
| YCL036W   | GFD2      | DELETION          | -0.047647 | -0.747197 |
| YCL037C   | SRO9      | DELETION          | -3.09256  | 3.666234  |
| YCL045C   | EMC1      | DELETION          | NaN       | NaN       |
| YCL050C   | APA1      | DELETION          | 0.322859  | -0.438677 |
| YCL056C   | PEX34     | DELETION          | NaN       | NaN       |
| YCL061C   | MRC1      | DELETION          | 0.893336  | 0.39411   |
| YCR008W   | SAT4      | DELETION          | -0.186506 | -0.56631  |
| YCR009C   | RVS161    | DELETION          | -0.319661 | -1.629601 |
| YCR014C   | POL4      | DELETION          | 0.319298  | -1.118013 |
| YCR017C   | CWH43     | DELETION          | 0.300374  | -1.312305 |
| YCR019W   | MAK32     | DELETION          | 0.801532  | -0.401733 |
| YCR020C   | PET18     | DELETION          | -0.528959 | -0.071968 |
| YCR020C-A | MAK31     | DELETION          | -0.719175 | 0.284191  |
| YCR024C-A | PMP1      | DELETION          | -0.095153 | -0.221322 |
| YCR026C   | NPP1      | DELETION          | 0.971135  | 0.7989    |
| YCR027C   | RHB1      | DELETION          | 0.669709  | 0.016798  |
| YCR028C-A | RIM1      | DELETION          | 0.825341  | -0.812427 |
| YCR031C   | RPS14A    | DELETION          | 0.171407  | -0.279072 |

|           |           |          |           |           |
|-----------|-----------|----------|-----------|-----------|
| YCR033W   | SNT1      | DELETION | 0.805054  | -0.182572 |
| YCR034W   | FEN1      | DELETION | -2.275112 | -1.929964 |
| YCR036W   | RBK1      | DELETION | 0.347821  | -0.87044  |
| YCR044C   | PER1      | DELETION | 0.122054  | -2.310331 |
| YCR050C   | YCR050C   | DELETION | 0.337437  | -0.480834 |
| YCR053W   | THR4      | DELETION | 0.383642  | 1.074972  |
| YCR061W   | YCR061W   | DELETION | 0.296015  | -1.111676 |
| YCR063W   | BUD31     | DELETION | -3.072759 | 0.863673  |
| YCR065W   | HCM1      | DELETION | 0.534178  | -0.657953 |
| YCR066W   | RAD18     | DELETION | -0.43713  | -1.670012 |
| YCR067C   | SED4      | DELETION | 0.03432   | -1.10572  |
| YCR071C   | IMG2      | DELETION | 0.528316  | -0.219948 |
| YCR077C   | PAT1      | DELETION | 0.146331  | -0.597096 |
| YCR081W   | SRB8      | DELETION | NaN       | -4.581984 |
| YCR082W   | AHC2      | DELETION | 0.667012  | 0.207798  |
| YCR084C   | TUP1      | DELETION | 0.644404  | -0.289027 |
| YCR086W   | CSM1      | DELETION | -4.536085 | -0.119004 |
| YCR087C-A | YCR087C-A | DELETION | NaN       | NaN       |
| YCR088W   | ABP1      | DELETION | 0.312781  | -0.765444 |
| YCR089W   | FIG2      | DELETION | 0.141058  | -0.511016 |
| YCR093W   | CDC39     | DAmP     | NaN       | NaN       |
| YDL002C   | NHP10     | DELETION | -5.810785 | 1.448767  |
| YDL006W   | PTC1      | DELETION | -0.295571 | -7.739508 |
| YDL008W   | APC11     | DAmP     | NaN       | NaN       |
| YDL013W   | SLX5      | DELETION | 1.94169   | 1.621644  |
| YDL020C   | RPN4      | DELETION | -3.291716 | 1.351696  |
| YDL025C   | RTK1      | DELETION | NaN       | NaN       |
| YDL033C   | SLM3      | DELETION | 0.265016  | -0.52246  |
| YDL040C   | NAT1      | DELETION | 1.259102  | 1.649513  |
| YDL048C   | STP4      | DELETION | 0.495048  | -0.046233 |
| YDL051W   | LHP1      | DELETION | -0.065454 | 0.621351  |
| YDL052C   | SLC1      | DELETION | -0.150433 | -2.022002 |
| YDL056W   | MBP1      | DELETION | 0.383148  | 1.16815   |
| YDL059C   | RAD59     | DELETION | -0.117753 | -1.00787  |
| YDL061C   | RPS29B    | DELETION | -1.340785 | -0.066402 |
| YDL065C   | PEX19     | DELETION | 0.054862  | -0.154231 |
| YDL070W   | BDF2      | DELETION | 1.659005  | 2.596101  |
| YDL074C   | BRE1      | DELETION | 4.036738  | -0.597397 |
| YDL076C   | RXT3      | DELETION | -1.662686 | 1.036959  |
| YDL077C   | VAM6      | DELETION | 0.267459  | 2.238531  |
| YDL080C   | THI3      | DELETION | 1.592495  | -1.370884 |
| YDL082W   | RPL13A    | DELETION | 1.511185  | -0.921236 |
| YDL083C   | RPS16B    | DELETION | -0.034693 | 0.942716  |
| YDL088C   | ASM4      | DELETION | 0.04945   | -1.043091 |
| YDL089W   | NUR1      | DELETION | NaN       | NaN       |
| YDL091C   | UBX3      | DELETION | -0.305245 | 0.480678  |
| YDL093W   | PMT5      | DELETION | -2.305992 | 0.840722  |

|           |         |          |           |            |
|-----------|---------|----------|-----------|------------|
| YDL095W   | PMT1    | DELETION | 1.229015  | -0.305441  |
| YDL099W   | BUG1    | DELETION | -0.777882 | 0.550856   |
| YDL100C   | GET3    | DELETION | -3.780383 | 0.622874   |
| YDL102W   | POL3    | DAmP     | NaN       | NaN        |
| YDL115C   | IWR1    | DELETION | 2.405421  | 0.44055    |
| YDL117W   | CYK3    | DELETION | -1.198057 | -0.040117  |
| YDL122W   | UBP1    | DELETION | -2.029444 | 1.12496    |
| YDL125C   | HNT1    | DELETION | -1.248142 | -0.67242   |
| YDL126C   | CDC48   | DAmP     | NaN       | NaN        |
| YDL130W   | RPP1B   | DELETION | -2.283714 | 1.062322   |
| YDL132W   | CDC53   | DAmP     | NaN       | NaN        |
| YDL133C-A | RPL41B  | DELETION | -0.633893 | 0.37661    |
| YDL134C   | PPH21   | DELETION | 0.367826  | -0.884002  |
| YDL135C   | RDI1    | DELETION | -1.52523  | 0.029402   |
| YDL136W   | RPL35B  | DELETION | -0.177146 | 0.702075   |
| YDL140C   | RPO21   | DAmP     | NaN       | NaN        |
| YDL142C   | CRD1    | DELETION | 0.289325  | 1.449072   |
| YDL155W   | CLB3    | DELETION | -0.533226 | 0.322362   |
| YDL165W   | CDC36   | DAmP     | NaN       | NaN        |
| YDL167C   | NRP1    | DELETION | -1.193063 | -0.659255  |
| YDL170W   | UGA3    | DELETION | 0.146995  | -0.651793  |
| YDL175C   | AIR2    | DELETION | 0.006773  | 0.231417   |
| YDL176W   | YDL176W | DELETION | 0.665722  | -0.1643    |
| YDL185W   | TFP1    | DELETION | NaN       | NaN        |
| YDL188C   | PPH22   | DELETION | 0.170379  | 0.331484   |
| YDL190C   | UFD2    | DELETION | -1.466775 | -0.115701  |
| YDL191W   | RPL35A  | DELETION | -1.730624 | 0.413492   |
| YDL192W   | ARF1    | DELETION | -0.509878 | -3.991995  |
| YDL194W   | SNF3    | DELETION | -0.478512 | 1.459869   |
| YDL203C   | ACK1    | DELETION | -0.513591 | -5.192709  |
| YDL204W   | RTN2    | DELETION | 0.187019  | -0.20294   |
| YDL213C   | NOP6    | DELETION | 0.479055  | 0.070356   |
| YDL223C   | HBT1    | DELETION | 0.543609  | -0.295052  |
| YDL224C   | WHI4    | DELETION | 0.78238   | 0.706141   |
| YDL226C   | GCS1    | DELETION | -0.173757 | 1.009843   |
| YDL230W   | PTP1    | DELETION | -0.084358 | -0.406561  |
| YDL232W   | OST4    | DELETION | 0.532615  | 0.293423   |
| YDL243C   | AAD4    | DELETION | -0.353137 | 0.034356   |
| YDR004W   | RAD57   | DELETION | -2.590562 | -11.590237 |
| YDR005C   | MAF1    | DELETION | -2.480535 | 1.428708   |
| YDR009W   | GAL3    | DELETION | 0.133515  | 0.28952    |
| YDR014W   | RAD61   | DELETION | -0.175723 | 1.131514   |
| YDR025W   | RPS11A  | DELETION | -0.625173 | -1.074341  |
| YDR049W   | VMS1    | DELETION | NaN       | NaN        |
| YDR054C   | CDC34   | DAmP     | NaN       | NaN        |
| YDR057W   | YOS9    | DELETION | 0.764204  | 0.669928   |
| YDR059C   | UBC5    | DELETION | 0.859756  | -0.009013  |

|         |         |          |           |            |
|---------|---------|----------|-----------|------------|
| YDR061W | YDR061W | DELETION | 0.666734  | 0.214981   |
| YDR069C | DOA4    | DELETION | NaN       | NaN        |
| YDR072C | IPT1    | DELETION | 0.278157  | -0.937737  |
| YDR073W | SNF11   | DELETION | -0.721605 | -0.06867   |
| YDR074W | TPS2    | DELETION | 2.034733  | 2.236377   |
| YDR075W | PPH3    | DELETION | -2.935816 | -1.977679  |
| YDR076W | RAD55   | DELETION | -3.415708 | -10.426466 |
| YDR080W | VPS41   | DELETION | -2.802531 | -3.583635  |
| YDR083W | RRP8    | DELETION | 0.003778  | 0.72527    |
| YDR092W | UBC13   | DELETION | -0.571336 | -1.00809   |
| YDR096W | GIS1    | DELETION | 0.285883  | -0.63305   |
| YDR097C | MSH6    | DELETION | 0.004552  | -0.449607  |
| YDR099W | BMH2    | DELETION | 0.037361  | 1.437582   |
| YDR101C | ARX1    | DELETION | -3.894226 | 0.348288   |
| YDR108W | GSG1    | DELETION | -6.940397 | -0.133236  |
| YDR118W | APC4    | DAmP     | NaN       | NaN        |
| YDR120C | TRM1    | DELETION | -0.940778 | -0.195639  |
| YDR121W | DPB4    | DELETION | -0.797436 | 0.649508   |
| YDR122W | KIN1    | DELETION | 1.34977   | 0.183917   |
| YDR125C | ECM18   | DELETION | 0.063483  | -0.205894  |
| YDR126W | SWF1    | DELETION | -2.305678 | 0.515876   |
| YDR127W | ARO1    | DELETION | -7.748569 | -1.170547  |
| YDR128W | MTC5    | DELETION | -1.686252 | -3.887093  |
| YDR131C | YDR131C | DELETION | -0.096733 | -0.683168  |
| YDR144C | MKC7    | DELETION | 0.217467  | -0.870024  |
| YDR145W | TAF12   | DAmP     | NaN       | NaN        |
| YDR146C | SWI5    | DELETION | 0.360055  | -1.221368  |
| YDR150W | NUM1    | DELETION | 3.619512  | 1.481601   |
| YDR153C | ENT5    | DELETION | 0.29928   | 0.532495   |
| YDR155C | CPR1    | DELETION | -0.536133 | -0.000588  |
| YDR156W | RPA14   | DELETION | -0.852457 | 0.485051   |
| YDR159W | SAC3    | DELETION | -1.915583 | -1.566464  |
| YDR161W | YDR161W | DELETION | -0.339228 | 0.970754   |
| YDR162C | NBP2    | DELETION | 0.494521  | -1.397446  |
| YDR163W | CWC15   | DELETION | 0.134062  | -1.731434  |
| YDR167W | TAF10   | DAmP     | NaN       | NaN        |
| YDR171W | HSP42   | DELETION | 0.659664  | -0.722914  |
| YDR173C | ARG82   | DELETION | 1.646504  | 0.215367   |
| YDR174W | HMO1    | DELETION | NaN       | NaN        |
| YDR176W | NGG1    | DELETION | NaN       | NaN        |
| YDR177W | UBC1    | DAmP     | NaN       | NaN        |
| YDR181C | SAS4    | DELETION | 0.694967  | -0.218229  |
| YDR183W | PLP1    | DELETION | 0.419208  | 0.00853    |
| YDR191W | HST4    | DELETION | -0.688504 | -0.251183  |
| YDR192C | NUP42   | DELETION | -0.337791 | -0.025198  |
| YDR202C | RAV2    | DELETION | 0.085404  | 1.47283    |
| YDR207C | UME6    | DELETION | NaN       | 1.886844   |



|           |         |          |           |           |
|-----------|---------|----------|-----------|-----------|
| YDR217C   | RAD9    | DELETION | 0.23721   | 0.265813  |
| YDR219C   | MFB1    | DELETION | 1.213875  | 0.57187   |
| YDR221W   | GTB1    | DELETION | 0.468345  | -2.000417 |
| YDR225W   | HTA1    | DELETION | 0.256498  | -1.347573 |
| YDR233C   | RTN1    | DELETION | 0.296233  | -0.253842 |
| YDR244W   | PEX5    | DELETION | 0.123814  | -0.619998 |
| YDR245W   | MNN10   | DELETION | -2.295516 | -5.370949 |
| YDR254W   | CHL4    | DELETION | 1.138767  | 0.037835  |
| YDR255C   | RMD5    | DELETION | -1.116156 | -1.195316 |
| YDR257C   | RKM4    | DELETION | NaN       | NaN       |
| YDR260C   | SWM1    | DELETION | -1.685262 | 1.20281   |
| YDR265W   | PEX10   | DELETION | -0.48271  | 0.032464  |
| YDR266C   | YDR266C | DELETION | -0.865377 | -1.349435 |
| YDR276C   | PMP3    | DELETION | 1.472121  | -1.668984 |
| YDR279W   | RNH202  | DELETION | 0.754838  | 0.823343  |
| YDR289C   | RTT103  | DELETION | -3.493118 | 2.751506  |
| YDR293C   | SSD1    | DELETION | -5.174787 | 4.611766  |
| YDR294C   | DPL1    | DELETION | 0.105739  | 0.276893  |
| YDR297W   | SUR2    | DELETION | 0.170145  | -0.382627 |
| YDR303C   | RSC3    | DAmP     | NaN       | NaN       |
| YDR304C   | CPR5    | DELETION | 0.299179  | 0.195711  |
| YDR306C   | YDR306C | DELETION | -0.275871 | 0.168395  |
| YDR308C   | SRB7    | DAmP     | NaN       | NaN       |
| YDR310C   | SUM1    | DELETION | 2.755647  | 0.422323  |
| YDR311W   | TFB1    | DAmP     | NaN       | NaN       |
| YDR312W   | SSF2    | DELETION | -0.30505  | 0.379793  |
| YDR313C   | PIB1    | DELETION | 0.358274  | -0.53865  |
| YDR315C   | IPK1    | DELETION | -3.641665 | -1.188236 |
| YDR318W   | MCM21   | DELETION | 1.463313  | 0.025277  |
| YDR320C   | SWA2    | DELETION | -3.817169 | -0.570575 |
| YDR329C   | PEX3    | DELETION | -0.410717 | -0.633728 |
| YDR330W   | UBX5    | DELETION | -0.676857 | -1.863133 |
| YDR332W   | IRC3    | DELETION | -0.055176 | 0.164011  |
| YDR334W   | SWR1    | DELETION | -6.289484 | -0.006839 |
| YDR335W   | MSN5    | DELETION | -6.076372 | -0.412715 |
| YDR358W   | GGA1    | DELETION | -0.116915 | 0.521446  |
| YDR359C   | EAF1    | DELETION | -0.61972  | -1.231286 |
| YDR363W   | ESC2    | DELETION | -2.450442 | 0.670515  |
| YDR363W-A | SEM1    | DELETION | -1.529875 | 0.339441  |
| YDR369C   | XRS2    | DELETION | -9.203645 | -8.582214 |
| YDR372C   | VPS74   | DELETION | -0.378729 | -1.993744 |
| YDR378C   | LSM6    | DELETION | 1.475677  | 2.88219   |
| YDR382W   | RPP2B   | DELETION | -0.6605   | -4.802521 |
| YDR383C   | NKP1    | DELETION | -0.313651 | 0.248512  |
| YDR385W   | EFT2    | DELETION | 0.253385  | -0.157267 |
| YDR386W   | MUS81   | DELETION | -2.408555 | -3.051157 |
| YDR388W   | RVS167  | DELETION | 1.056962  | -1.99945  |

|         |        |          |           |            |
|---------|--------|----------|-----------|------------|
| YDR389W | SAC7   | DELETION | -3.276586 | -10.688388 |
| YDR392W | SPT3   | DELETION | NaN       | -2.862429  |
| YDR393W | SHE9   | DELETION | 1.441103  | -1.128276  |
| YDR395W | SXM1   | DELETION | -2.700469 | 0.360878   |
| YDR404C | RPB7   | DAmP     | NaN       | NaN        |
| YDR409W | SIZ1   | DELETION | -1.098037 | -0.305072  |
| YDR414C | ERD1   | DELETION | 0.319341  | -0.251476  |
| YDR420W | HKR1   | DELETION | 0.746706  | 0.302476   |
| YDR421W | ARO80  | DELETION | 1.693434  | -2.910197  |
| YDR422C | SIP1   | DELETION | -0.285263 | -1.105045  |
| YDR423C | CAD1   | DELETION | -0.633997 | -1.087977  |
| YDR424C | DYN2   | DELETION | 0.416522  | -0.046912  |
| YDR435C | PPM1   | DELETION | 2.057024  | 0.149272   |
| YDR439W | LRS4   | DELETION | -0.454263 | -0.566527  |
| YDR440W | DOT1   | DELETION | 0.416424  | -0.231772  |
| YDR443C | SSN2   | DELETION | -3.95865  | 1.158879   |
| YDR448W | ADA2   | DELETION | NaN       | -3.302051  |
| YDR451C | YHP1   | DELETION | -0.006743 | 0.442062   |
| YDR460W | TFB3   | DAmP     | NaN       | NaN        |
| YDR463W | STP1   | DELETION | -0.509594 | -1.160683  |
| YDR466W | PKH3   | DELETION | 1.158395  | 0.123797   |
| YDR469W | SDC1   | DELETION | 4.509931  | 0.055208   |
| YDR477W | SNF1   | DELETION | 0.297163  | 0.44069    |
| YDR479C | PEX29  | DELETION | 0.425482  | -0.436234  |
| YDR482C | CWC21  | DELETION | 0.019993  | 0.069305   |
| YDR485C | VPS72  | DELETION | -9.442651 | 1.312653   |
| YDR488C | PAC11  | DELETION | 0.730387  | 0.329225   |
| YDR490C | PKH1   | DELETION | -0.055706 | -0.383802  |
| YDR496C | PUF6   | DELETION | -0.386413 | 0.298103   |
| YDR497C | ITR1   | DELETION | -0.332143 | -1.012504  |
| YDR500C | RPL37B | DELETION | NaN       | NaN        |
| YDR505C | PSP1   | DELETION | -0.801808 | -1.339899  |
| YDR508C | GNP1   | DELETION | -1.727496 | 0.139632   |
| YDR510W | SMT3   | DAmP     | NaN       | NaN        |
| YDR512C | EMI1   | DELETION | 2.26287   | -1.982265  |
| YDR527W | RBA50  | DAmP     | NaN       | NaN        |
| YDR532C | KRE28  | DELETION | NaN       | NaN        |
| YEL003W | GIM4   | DELETION | 1.959552  | 0.150945   |
| YEL007W | MIT1   | DELETION | NaN       | NaN        |
| YEL012W | UBC8   | DELETION | -1.228262 | 0.152396   |
| YEL013W | VAC8   | DELETION | 0.240907  | 1.08878    |
| YEL015W | EDC3   | DELETION | -0.09663  | -0.686341  |
| YEL031W | SPF1   | DELETION | -2.795258 | -1.898774  |
| YEL033W | MTC7   | DELETION | -3.165304 | -4.965451  |
| YEL037C | RAD23  | DELETION | -1.264534 | 0.651646   |
| YEL041W | YEF1   | DELETION | 1.223938  | 0.517328   |
| YEL042W | GDA1   | DELETION | -0.088992 | -0.939608  |

|         |         |          |            |           |
|---------|---------|----------|------------|-----------|
| YEL043W | YEL043W | DELETION | 0.343246   | 1.448171  |
| YEL047C | YEL047C | DELETION | 0.664091   | 0.971569  |
| YEL048C | TCA17   | DELETION | NaN        | NaN       |
| YEL053C | MAK10   | DELETION | 0.19287    | 0.915205  |
| YEL056W | HAT2    | DELETION | 0.288296   | -0.778821 |
| YEL060C | PRB1    | DELETION | NaN        | NaN       |
| YEL061C | CIN8    | DELETION | NaN        | NaN       |
| YEL062W | NPR2    | DELETION | -0.39764   | 1.624067  |
| YEL064C | AVT2    | DELETION | -1.293517  | 0.582707  |
| YER002W | NOP16   | DELETION | -0.73571   | -1.136407 |
| YER005W | YND1    | DELETION | -0.078139  | -0.120621 |
| YER007W | PAC2    | DELETION | 0.304158   | 0.600793  |
| YER016W | BIM1    | DELETION | 2.775666   | 2.693054  |
| YER019W | ISC1    | DELETION | -0.945026  | 0.971108  |
| YER020W | GPA2    | DELETION | -3.039808  | -0.592991 |
| YER022W | SRB4    | DAmP     | NaN        | NaN       |
| YER030W | CHZ1    | DELETION | 0.833323   | 0.657424  |
| YER031C | YPT31   | DELETION | -1.979002  | 1.232706  |
| YER032W | FIR1    | DELETION | -0.364469  | 0.291597  |
| YER048C | CAJ1    | DELETION | 0.41698    | -0.574678 |
| YER051W | JHD1    | DELETION | -0.148908  | -1.738344 |
| YER052C | HOM3    | DELETION | 0.101472   | -1.139648 |
| YER061C | CEM1    | DELETION | 2.105096   | 1.178069  |
| YER064C | VHR2    | DELETION | NaN        | NaN       |
| YER068W | MOT2    | DELETION | NaN        | NaN       |
| YER072W | VTC1    | DELETION | 1.005908   | -0.5692   |
| YER075C | PTP3    | DELETION | -0.176562  | -1.255971 |
| YER077C | YER077C | DELETION | 0.792025   | 0.086778  |
| YER083C | GET2    | DELETION | NaN        | NaN       |
| YER088C | DOT6    | DELETION | 0.097644   | -0.907492 |
| YER089C | PTC2    | DELETION | 0.1191     | 0.06498   |
| YER092W | IES5    | DELETION | NaN        | NaN       |
| YER095W | RAD51   | DELETION | NaN        | NaN       |
| YER098W | UBP9    | DELETION | 0.900398   | 0.547778  |
| YER111C | SWI4    | DELETION | NaN        | -5.501658 |
| YER114C | BOI2    | DELETION | 0.281589   | -1.450674 |
| YER116C | SLX8    | DELETION | 1.419216   | 2.038068  |
| YER120W | SCS2    | DELETION | -0.853452  | -0.5173   |
| YER123W | YCK3    | DELETION | 0.660988   | -0.407242 |
| YER125W | RSP5    | DAmP     | NaN        | NaN       |
| YER129W | SAK1    | DELETION | 1.456492   | 0.485201  |
| YER139C | RTR1    | DELETION | -10.701333 | 1.283022  |
| YER144C | UBP5    | DELETION | 0.629174   | -0.248302 |
| YER149C | PEA2    | DELETION | 1.418121   | -0.264722 |
| YER151C | UBP3    | DELETION | -6.162482  | -6.582976 |
| YER155C | BEM2    | DELETION | -0.444166  | 1.794442  |
| YER156C | YER156C | DELETION | -2.302506  | -1.302535 |

|           |        |          |           |           |
|-----------|--------|----------|-----------|-----------|
| YER161C   | SPT2   | DELETION | 0.091341  | 0.953493  |
| YER162C   | RAD4   | DELETION | -4.08688  | -5.460147 |
| YER164W   | CHD1   | DELETION | -0.942263 | -0.181969 |
| YER166W   | DNF1   | DELETION | 1.36954   | -0.336814 |
| YER167W   | BCK2   | DELETION | -1.466465 | -0.212884 |
| YER173W   | RAD24  | DELETION | 0.971138  | -0.283346 |
| YER174C   | GRX4   | DELETION | 0.267896  | -0.877545 |
| YER177W   | BMH1   | DELETION | -1.138934 | 1.221822  |
| YER178W   | PDA1   | DELETION | -0.909526 | 0.281428  |
| YFL001W   | DEG1   | DELETION | -4.298334 | 0.026651  |
| YFL003C   | MSH4   | DELETION | -1.60408  | 0.698693  |
| YFL007W   | BLM10  | DELETION | -1.002532 | 1.95302   |
| YFL009W   | CDC4   | DAmP     | NaN       | NaN       |
| YFL011W   | HXT10  | DELETION | -0.378313 | -0.890758 |
| YFL013C   | IES1   | DELETION | -5.347516 | 2.723195  |
| YFL018C   | LPD1   | DELETION | 3.218845  | 2.266633  |
| YFL023W   | BUD27  | DELETION | -9.901201 | 1.120754  |
| YFL024C   | EPL1   | DAmP     | NaN       | NaN       |
| YFL025C   | BST1   | DELETION | NaN       | NaN       |
| YFL027C   | GYP8   | DELETION | -0.96723  | 1.676494  |
| YFL027C   | GYP8   | DELETION | -0.96723  | 1.676494  |
| YFL030W   | AGX1   | DELETION | -0.44428  | 0.014055  |
| YFL031W   | HAC1   | DELETION | NaN       | NaN       |
| YFL033C   | RIM15  | DELETION | -0.317958 | 0.864202  |
| YFL036W   | RPO41  | DELETION | NaN       | NaN       |
| YFL049W   | SWP82  | DELETION | 0.323305  | -1.784607 |
| YFR009W   | GCN20  | DELETION | 1.3501    | -0.279268 |
| YFR010W   | UBP6   | DELETION | -0.281065 | -1.417799 |
| YFR013W   | IOC3   | DELETION | 1.928754  | 0.152352  |
| YFR019W   | FAB1   | DELETION | -0.047583 | 1.098595  |
| YFR031C-A | RPL2A  | DELETION | 0.717488  | 0.809938  |
| YFR036W   | CDC26  | DELETION | -3.379289 | 1.389902  |
| YFR040W   | SAP155 | DELETION | -0.658537 | 0.422016  |
| YFR041C   | ERJ5   | DELETION | -0.35693  | -1.658235 |
| YFR048W   | RMD8   | DELETION | 0.107882  | 1.141588  |
| YFR053C   | HXK1   | DELETION | -0.312182 | -0.09545  |
| YGL003C   | CDH1   | DELETION | -5.71312  | -2.783821 |
| YGL005C   | COG7   | DELETION | -1.385457 | -1.063431 |
| YGL014W   | PUF4   | DELETION | -1.743189 | -0.519048 |
| YGL016W   | KAP122 | DELETION | -1.158503 | 1.376201  |
| YGL019W   | CKB1   | DELETION | 2.230324  | 1.06394   |
| YGL020C   | GET1   | DELETION | -6.614609 | -0.435545 |
| YGL025C   | PGD1   | DELETION | -0.103091 | -0.396171 |
| YGL027C   | CWH41  | DELETION | 0.024019  | -2.877455 |
| YGL028C   | SCW11  | DELETION | -1.333715 | 0.505986  |
| YGL029W   | CGR1   | DELETION | -0.239841 | -0.331743 |
| YGL031C   | RPL24A | DELETION | -1.441172 | 0.50745   |

|         |         |          |           |            |
|---------|---------|----------|-----------|------------|
| YGL035C | MIG1    | DELETION | -0.761769 | 0.931654   |
| YGL043W | DST1    | DELETION | -1.346671 | 2.060946   |
| YGL045W | RIM8    | DELETION | -4.887408 | -5.090521  |
| YGL049C | TIF4632 | DELETION | -0.058848 | 0.881617   |
| YGL054C | ERV14   | DELETION | -2.21288  | 0.699645   |
| YGL058W | RAD6    | DELETION | 2.809304  | 0.547092   |
| YGL060W | YBP2    | DELETION | -2.062363 | -0.957373  |
| YGL066W | SGF73   | DELETION | -4.611825 | 2.166867   |
| YGL067W | NPY1    | DELETION | -0.253749 | -0.427687  |
| YGL070C | RPB9    | DELETION | 4.914765  | 0.203419   |
| YGL078C | DBP3    | DELETION | -0.113352 | -1.851115  |
| YGL081W | YGL081W | DELETION | 0.5288    | -0.781275  |
| YGL084C | GUP1    | DELETION | -1.514049 | -0.365106  |
| YGL086W | MAD1    | DELETION | 1.460645  | 1.405977   |
| YGL087C | MMS2    | DELETION | 2.046229  | -0.535572  |
| YGL090W | LIF1    | DELETION | 0.91722   | -2.062135  |
| YGL105W | ARC1    | DELETION | -3.905746 | 1.260098   |
| YGL110C | CUE3    | DELETION | 0.551983  | 1.100632   |
| YGL115W | SNF4    | DELETION | 1.400906  | 0.663815   |
| YGL116W | CDC20   | DAmP     | NaN       | NaN        |
| YGL124C | MON1    | DELETION | -0.851763 | 2.15534    |
| YGL126W | SCS3    | DELETION | 0.592966  | 0.539554   |
| YGL127C | SOH1    | DELETION | NaN       | NaN        |
| YGL131C | SNT2    | DELETION | -0.278645 | -0.180645  |
| YGL133W | ITC1    | DELETION | 0.583723  | -1.06655   |
| YGL136C | MRM2    | DELETION | NaN       | NaN        |
| YGL141W | HUL5    | DELETION | -0.296947 | -0.961282  |
| YGL147C | RPL9A   | DELETION | 0.00637   | 0.477907   |
| YGL151W | NUT1    | DELETION | -0.694966 | 1.634693   |
| YGL153W | PEX14   | DELETION | 0.106642  | -1.390408  |
| YGL161C | YIP5    | DELETION | -0.421341 | 0.17845    |
| YGL163C | RAD54   | DELETION | -1.474424 | -10.254979 |
| YGL167C | PMR1    | DELETION | 1.493684  | 5.138305   |
| YGL168W | HUR1    | DELETION | 0.67923   | 3.874841   |
| YGL173C | KEM1    | DELETION | -1.89662  | 1.201428   |
| YGL174W | BUD13   | DELETION | -0.361041 | -0.786682  |
| YGL175C | SAE2    | DELETION | -0.161103 | -0.105886  |
| YGL194C | HOS2    | DELETION | 0.513843  | 0.116841   |
| YGL195W | GCN1    | DELETION | 1.317477  | -2.07739   |
| YGL196W | DSD1    | DELETION | 0.102456  | -0.727629  |
| YGL197W | MDS3    | DELETION | 0.392811  | -0.898803  |
| YGL203C | KEX1    | DELETION | -0.957652 | -1.379851  |
| YGL211W | NCS6    | DELETION | -0.898467 | 2.57268    |
| YGL212W | VAM7    | DELETION | 1.115789  | 3.152421   |
| YGL213C | SKI8    | DELETION | NaN       | NaN        |
| YGL216W | KIP3    | DELETION | -2.400889 | 2.246977   |
| YGL219C | MDM34   | DELETION | 4.298566  | 3.302847   |

|           |         |          |           |           |
|-----------|---------|----------|-----------|-----------|
| YGL226C-A | OST5    | DELETION | 0.066066  | -0.24234  |
| YGL227W   | VID30   | DELETION | -0.120407 | 0.344313  |
| YGL228W   | SHE10   | DELETION | -0.41085  | -0.101788 |
| YGL232W   | TAN1    | DELETION | -0.047673 | -0.12839  |
| YGL237C   | HAP2    | DELETION | -4.200129 | -3.488335 |
| YGL240W   | DOC1    | DELETION | -5.805154 | 1.73444   |
| YGL242C   | YGL242C | DELETION | 0.471426  | -1.677468 |
| YGL244W   | RTF1    | DELETION | 3.767536  | 0.905928  |
| YGL250W   | RMR1    | DELETION | -0.232921 | 0.927793  |
| YGL252C   | RTG2    | DELETION | -4.474844 | -2.196676 |
| YGL253W   | HXK2    | DELETION | -2.395204 | 0.245809  |
| YGL255W   | ZRT1    | DELETION | -0.81291  | 0.849623  |
| YGR003W   | CUL3    | DELETION | 0.564312  | -0.061414 |
| YGR019W   | UGA1    | DELETION | 1.107853  | 0.632037  |
| YGR037C   | ACB1    | DELETION | -1.569601 | -0.296398 |
| YGR038W   | ORM1    | DELETION | -0.068157 | 0.277339  |
| YGR054W   | YGR054W | DELETION | 0.121968  | 0.821938  |
| YGR056W   | RSC1    | DELETION | NaN       | -3.100531 |
| YGR058W   | PEF1    | DELETION | 0.405955  | -1.587225 |
| YGR071C   | ENV11   | DELETION | NaN       | NaN       |
| YGR072W   | UPF3    | DELETION | -0.309978 | 0.767457  |
| YGR077C   | PEX8    | DELETION | -1.22539  | -0.40143  |
| YGR078C   | PAC10   | DELETION | 2.305033  | -0.202082 |
| YGR081C   | SLX9    | DELETION | -0.156419 | -0.025626 |
| YGR085C   | RPL11B  | DELETION | -0.31695  | 0.351687  |
| YGR086C   | PIL1    | DELETION | 0.398628  | 0.207029  |
| YGR089W   | NNF2    | DELETION | 0.116492  | 1.189046  |
| YGR092W   | DBF2    | DELETION | 1.913331  | 1.02839   |
| YGR097W   | ASK10   | DELETION | 0.039536  | 1.093557  |
| YGR101W   | PCP1    | DELETION | 1.035914  | -0.528861 |
| YGR104C   | SRB5    | DELETION | NaN       | -11.50986 |
| YGR105W   | VMA21   | DELETION | -2.75648  | 0.845997  |
| YGR108W   | CLB1    | DELETION | 0.489686  | -0.676311 |
| YGR109C   | CLB6    | DELETION | -0.068112 | 0.741638  |
| YGR118W   | RPS23A  | DELETION | -0.075594 | 0.68897   |
| YGR122W   | YGR122W | DELETION | -5.14294  | -3.874031 |
| YGR123C   | PPT1    | DELETION | -0.690853 | -1.522193 |
| YGR129W   | SYF2    | DELETION | -0.35596  | -0.964508 |
| YGR133W   | PEX4    | DELETION | -0.834986 | -0.915413 |
| YGR134W   | CAF130  | DELETION | -1.971413 | -0.699708 |
| YGR135W   | PRE9    | DELETION | -2.089121 | -3.810422 |
| YGR157W   | CHO2    | DELETION | -1.120841 | -0.89347  |
| YGR163W   | GTR2    | DELETION | -0.207914 | -0.296861 |
| YGR166W   | KRE11   | DELETION | 0.06642   | -5.793424 |
| YGR170W   | PSD2    | DELETION | 0.109618  | -0.098513 |
| YGR174C   | CBP4    | DELETION | 2.785312  | -0.060409 |
| YGR178C   | PBP1    | DELETION | 2.033909  | 0.480957  |

|           |         |          |           |            |
|-----------|---------|----------|-----------|------------|
| YGR181W   | TIM13   | DELETION | 0.420484  | -0.401967  |
| YGR184C   | UBR1    | DELETION | -1.070886 | -0.960379  |
| YGR186W   | TFG1    | DAmP     | NaN       | NaN        |
| YGR188C   | BUB1    | DELETION | 2.564485  | 4.898574   |
| YGR196C   | FYV8    | DELETION | 0.270925  | -2.352261  |
| YGR197C   | SNG1    | DELETION | -0.448743 | -1.088312  |
| YGR200C   | ELP2    | DELETION | -6.413695 | 0.95858    |
| YGR202C   | PCT1    | DELETION | 0.122408  | -0.182957  |
| YGR203W   | YCH1    | DELETION | NaN       | NaN        |
| YGR208W   | SER2    | DELETION | -0.106712 | -1.494026  |
| YGR214W   | RPS0A   | DELETION | 1.443376  | -0.939427  |
| YGR214W   | RPS0A   | DELETION | 1.443376  | -0.939427  |
| YGR217W   | CCH1    | DELETION | -0.562463 | -3.551586  |
| YGR223C   | HSV2    | DELETION | -0.682881 | 1.14134    |
| YGR227W   | DIE2    | DELETION | 1.039652  | 0.287424   |
| YGR229C   | SMI1    | DELETION | -0.641308 | -0.30513   |
| YGR231C   | PHB2    | DELETION | 0.020285  | -1.164359  |
| YGR237C   | YGR237C | DELETION | -0.253388 | 0.721298   |
| YGR252W   | GCN5    | DELETION | NaN       | NaN        |
| YGR261C   | APL6    | DELETION | 0.511739  | 0.42467    |
| YGR270W   | YTA7    | DELETION | -0.362603 | 2.024091   |
| YGR275W   | RTT102  | DELETION | -0.932126 | -0.579695  |
| YGR284C   | ERV29   | DELETION | 0.147162  | -0.44355   |
| YGR295C   | COS6    | DELETION | -0.261568 | -0.857344  |
| YHL002W   | HSE1    | DELETION | 0.503566  | 1.131855   |
| YHL003C   | LAG1    | DELETION | 0.61515   | -0.605355  |
| YHL009C   | YAP3    | DELETION | -0.000877 | 0.893366   |
| YHL020C   | OPI1    | DELETION | -0.354025 | 0.277912   |
| YHL023C   | NPR3    | DELETION | NaN       | NaN        |
| YHL025W   | SNF6    | DELETION | NaN       | 0.702239   |
| YHL027W   | RIM101  | DELETION | -7.310231 | -2.921806  |
| YHL028W   | WSC4    | DELETION | 0.226337  | 0.689488   |
| YHL029C   | OCA5    | DELETION | 1.863031  | -1.31208   |
| YHL031C   | GOS1    | DELETION | -0.809978 | -5.788848  |
| YHL033C   | RPL8A   | DELETION | -2.116896 | -3.121631  |
| YHR001W-A | QCR10   | DELETION | 0.428246  | -0.700997  |
| YHR004C   | NEM1    | DELETION | -0.318006 | 2.027121   |
| YHR005C   | GPA1    | DELETION | NaN       | NaN        |
| YHR006W   | STP2    | DELETION | -0.030982 | 0.300156   |
| YHR009C   | TDA3    | DELETION | NaN       | NaN        |
| YHR012W   | VPS29   | DELETION | -0.857701 | 0.204318   |
| YHR021C   | RPS27B  | DELETION | -0.742463 | 1.737727   |
| YHR025W   | THR1    | DELETION | -3.742331 | 1.89305    |
| YHR030C   | SLT2    | DELETION | -1.985654 | -19.525068 |
| YHR031C   | RRM3    | DELETION | -2.137157 | -0.509599  |
| YHR034C   | PIH1    | DELETION | 1.811088  | 0.456312   |
| YHR039C   | MSC7    | DELETION | -1.613899 | -1.165944  |

|         |         |          |            |           |
|---------|---------|----------|------------|-----------|
| YHR041C | SRB2    | DELETION | -5.593798  | 1.974025  |
| YHR058C | MED6    | DAmP     | NaN        | NaN       |
| YHR066W | SSF1    | DELETION | -3.600792  | -0.310993 |
| YHR067W | HTD2    | DELETION | -0.577993  | 1.009948  |
| YHR077C | NMD2    | DELETION | NaN        | -0.600066 |
| YHR078W | YHR078W | DELETION | NaN        | 1.252553  |
| YHR079C | IRE1    | DELETION | NaN        | -5.510115 |
| YHR081W | LRP1    | DELETION | NaN        | NaN       |
| YHR082C | KSP1    | DELETION | NaN        | -0.119294 |
| YHR086W | NAM8    | DELETION | NaN        | 0.367986  |
| YHR090C | YNG2    | DELETION | NaN        | 0.13751   |
| YHR108W | GGA2    | DELETION | NaN        | NaN       |
| YHR111W | UBA4    | DELETION | NaN        | 1.507313  |
| YHR114W | BZZ1    | DELETION | NaN        | -1.363941 |
| YHR115C | DMA1    | DELETION | NaN        | 1.20921   |
| YHR129C | ARP1    | DELETION | NaN        | 0.54253   |
| YHR134W | WSS1    | DELETION | NaN        | -2.440412 |
| YHR135C | YCK1    | DELETION | NaN        | -2.121091 |
| YHR142W | CHS7    | DELETION | NaN        | -1.928804 |
| YHR151C | MTC6    | DELETION | NaN        | -2.218555 |
| YHR154W | RTT107  | DELETION | NaN        | -4.00444  |
| YHR156C | LIN1    | DELETION | NaN        | -2.359229 |
| YHR157W | REC104  | DELETION | NaN        | -0.540435 |
| YHR158C | KEL1    | DELETION | NaN        | NaN       |
| YHR166C | CDC23   | DAmP     | NaN        | NaN       |
| YHR167W | THP2    | DELETION | NaN        | NaN       |
| YHR178W | STB5    | DELETION | 3.511358   | NaN       |
| YHR179W | OYE2    | DELETION | -2.948729  | NaN       |
| YHR181W | SVP26   | DELETION | -2.924769  | NaN       |
| YHR185C | PFS1    | DELETION | -2.697407  | NaN       |
| YHR187W | IKI1    | DELETION | -7.079373  | NaN       |
| YHR189W | PTH1    | DELETION | -2.177301  | NaN       |
| YHR194W | MDM31   | DELETION | -0.918447  | NaN       |
| YHR200W | RPN10   | DELETION | -11.913214 | NaN       |
| YHR203C | RPS4B   | DELETION | NaN        | NaN       |
| YHR204W | MNL1    | DELETION | -1.091828  | NaN       |
| YHR206W | SKN7    | DELETION | -1.314102  | NaN       |
| YHR207C | SET5    | DELETION | 0.190594   | NaN       |
| YIL002C | INP51   | DELETION | -0.706985  | 0.405819  |
| YIL008W | URM1    | DELETION | -1.366659  | 1.34444   |
| YIL011W | TIR3    | DELETION | NaN        | NaN       |
| YIL021W | RPB3    | DAmP     | NaN        | NaN       |
| YIL027C | EMC5    | DELETION | NaN        | NaN       |
| YIL029C | YIL029C | DELETION | -0.84668   | 0.165728  |
| YIL030C | SSM4    | DELETION | -0.071636  | -1.730066 |
| YIL034C | CAP2    | DELETION | 0.253407   | 0.734355  |
| YIL035C | CKA1    | DELETION | 1.608147   | 0.446773  |



|         |         |          |           |           |
|---------|---------|----------|-----------|-----------|
| YIL036W | CST6    | DELETION | 0.905914  | 0.395648  |
| YIL037C | PRM2    | DELETION | 0.541291  | -1.22904  |
| YIL038C | NOT3    | DELETION | -0.750834 | 0.159352  |
| YIL039W | TED1    | DELETION | 0.320635  | 0.581004  |
| YIL040W | APQ12   | DELETION | -0.432547 | 0.81432   |
| YIL044C | YIL044C | DELETION | NaN       | NaN       |
| YIL046W | MET30   | DAmP     | NaN       | NaN       |
| YIL047C | SYG1    | DELETION | 0.378537  | -0.479558 |
| YIL049W | DFG10   | DELETION | 0.088206  | 0.552874  |
| YIL052C | RPL34B  | DELETION | 0.688855  | 0.098676  |
| YIL076W | SEC28   | DELETION | -3.802408 | 0.725337  |
| YIL079C | AIR1    | DELETION | 1.038089  | 0.622436  |
| YIL084C | SDS3    | DELETION | 1.520765  | 0.802042  |
| YIL084C | SDS3    | DELETION | 1.520765  | 0.802042  |
| YIL090W | ICE2    | DELETION | -4.670589 | -5.56155  |
| YIL095W | PRK1    | DELETION | -0.173397 | -0.238803 |
| YIL105C | SLM1    | DELETION | 1.24061   | -1.207429 |
| YIL110W | MNI1    | DELETION | 0.03753   | -0.259358 |
| YIL112W | HOS4    | DELETION | -0.688369 | 0.540419  |
| YIL119C | RPI1    | DELETION | 0.252007  | -0.755427 |
| YIL125W | KGD1    | DELETION | NaN       | NaN       |
| YIL126W | STH1    | DAmP     | NaN       | NaN       |
| YIL128W | MET18   | DELETION | 0.998264  | 2.275529  |
| YIL131C | FKH1    | DELETION | 0.186158  | 0.857395  |
| YIL133C | RPL16A  | DELETION | 1.094311  | 0.635079  |
| YIL134W | FLX1    | DELETION | -0.102523 | 0.288497  |
| YIL138C | TPM2    | DELETION | 0.54983   | 0.641561  |
| YIL139C | REV7    | DELETION | -0.646519 | -0.672823 |
| YIL149C | MLP2    | DELETION | -0.609261 | -0.428563 |
| YIL153W | RRD1    | DELETION | -4.543782 | -1.098737 |
| YIL154C | IMP2    | DELETION | NaN       | NaN       |
| YIL156W | UBP7    | DELETION | -0.56709  | -0.132645 |
| YIL159W | BNR1    | DELETION | NaN       | NaN       |
| YIR001C | SGN1    | DELETION | 0.174393  | -0.035644 |
| YIR002C | MPH1    | DELETION | 0.024058  | 0.013805  |
| YIR003W | AIM21   | DELETION | 0.084642  | -0.450786 |
| YIR004W | DJP1    | DELETION | 0.187385  | 0.531681  |
| YIR005W | IST3    | DELETION | 2.283129  | -0.048659 |
| YIR009W | MSL1    | DELETION | NaN       | NaN       |
| YIR018W | YAP5    | DELETION | -0.555769 | 0.637535  |
| YIR023W | DAL81   | DELETION | -3.834003 | -7.165396 |
| YIR033W | MGA2    | DELETION | 0.832765  | 2.778606  |
| YJL004C | SYS1    | DELETION | 0.174794  | -0.823816 |
| YJL013C | MAD3    | DELETION | 1.019901  | 0.123285  |
| YJL020C | BBC1    | DELETION | -1.773262 | -0.313678 |
| YJL023C | PET130  | DELETION | -2.08295  | -0.132088 |
| YJL024C | APS3    | DELETION | -0.756954 | -0.024787 |

|         |         |          |           |            |
|---------|---------|----------|-----------|------------|
| YJL029C | VPS53   | DELETION | -2.856588 | -2.525711  |
| YJL030W | MAD2    | DELETION | 0.699155  | 0.805413   |
| YJL036W | SNX4    | DELETION | -2.650474 | 1.226467   |
| YJL046W | AIM22   | DELETION | 2.372504  | 1.979646   |
| YJL047C | RTT101  | DELETION | -2.417273 | -3.918173  |
| YJL048C | UBX6    | DELETION | -0.063172 | -0.89724   |
| YJL053W | PEP8    | DELETION | -1.150182 | -2.326941  |
| YJL055W | YJL055W | DELETION | -0.35059  | -0.81749   |
| YJL062W | LAS21   | DELETION | -1.528411 | -1.305372  |
| YJL073W | JEM1    | DELETION | -0.77807  | 0.14998    |
| YJL081C | ARP4    | DAmP     | NaN       | NaN        |
| YJL082W | IML2    | DELETION | 0.691259  | 0.915638   |
| YJL090C | DPB11   | DAmP     | NaN       | NaN        |
| YJL092W | SRS2    | DELETION | -2.242239 | -4.495652  |
| YJL095W | BCK1    | DELETION | 1.123937  | -16.224689 |
| YJL098W | SAP185  | DELETION | 0.232161  | -0.765435  |
| YJL099W | CHS6    | DELETION | 0.657467  | 0.357118   |
| YJL103C | GSM1    | DELETION | 0.397424  | 0.200611   |
| YJL105W | SET4    | DELETION | -0.928769 | -0.519374  |
| YJL115W | ASF1    | DELETION | -0.952573 | -1.947069  |
| YJL117W | PHO86   | DELETION | 0.750162  | -0.298031  |
| YJL122W | ALB1    | DELETION | 0.286471  | -0.944591  |
| YJL123C | MTC1    | DELETION | 0.250986  | -0.850756  |
| YJL124C | LSM1    | DELETION | 0.019031  | 1.531625   |
| YJL128C | PBS2    | DELETION | 0.956143  | 0.627962   |
| YJL134W | LCB3    | DELETION | 0.484421  | -0.08195   |
| YJL136C | RPS21B  | DELETION | 0.272632  | 0.689497   |
| YJL138C | TIF2    | DELETION | -3.780485 | 1.684406   |
| YJL139C | YUR1    | DELETION | -0.942288 | -1.726197  |
| YJL140W | RPB4    | DELETION | 1.351096  | -0.216625  |
| YJL148W | RPA34   | DELETION | 0.120689  | 1.241678   |
| YJL149W | DAS1    | DELETION | 1.081409  | -0.67931   |
| YJL154C | VPS35   | DELETION | -0.26114  | 0.430854   |
| YJL157C | FAR1    | DELETION | 0.206809  | 0.213877   |
| YJL165C | HAL5    | DELETION | -0.172328 | -0.438799  |
| YJL168C | SET2    | DELETION | 0.67584   | 0.86966    |
| YJL176C | SWI3    | DELETION | NaN       | NaN        |
| YJL177W | RPL17B  | DELETION | -0.734707 | 0.181583   |
| YJL183W | MNN11   | DELETION | -1.128791 | 1.939455   |
| YJL187C | SWE1    | DELETION | -0.517442 | -0.18087   |
| YJL190C | RPS22A  | DELETION | NaN       | NaN        |
| YJL197W | UBP12   | DELETION | -0.73167  | 2.064815   |
| YJL198W | PHO90   | DELETION | 1.145418  | 1.154686   |
| YJL204C | RCY1    | DELETION | NaN       | NaN        |
| YJL208C | NUC1    | DELETION | -0.228643 | 0.227855   |
| YJL208C | NUC1    | DELETION | -0.228643 | 0.227855   |
| YJL210W | PEX2    | DELETION | -1.019398 | -0.896533  |

|           |         |          |           |           |
|-----------|---------|----------|-----------|-----------|
| YJL210W   | PEX2    | DELETION | -1.019398 | -0.896533 |
| YJL214W   | HXT8    | DELETION | -0.2623   | 0.530462  |
| YJR010C-A | SPC1    | DELETION | 0.016519  | 0.819312  |
| YJR011C   | YJR011C | DELETION | -8.077303 | -4.93702  |
| YJR017C   | ESS1    | DAmP     | NaN       | NaN       |
| YJR032W   | CPR7    | DELETION | -0.519485 | -3.221785 |
| YJR033C   | RAV1    | DELETION | 0.401168  | 1.568415  |
| YJR035W   | RAD26   | DELETION | -0.000459 | -0.276594 |
| YJR036C   | HUL4    | DELETION | 0.025604  | -1.075095 |
| YJR040W   | GEF1    | DELETION | -0.957113 | 0.222619  |
| YJR040W   | GEF1    | DELETION | -0.957113 | 0.222619  |
| YJR043C   | POL32   | DELETION | 0.55281   | 0.207151  |
| YJR050W   | ISY1    | DELETION | -0.890313 | 2.14222   |
| YJR052W   | RAD7    | DELETION | 1.348323  | 0.277681  |
| YJR053W   | BFA1    | DELETION | 0.709662  | 0.331889  |
| YJR054W   | YJR054W | DELETION | NaN       | NaN       |
| YJR059W   | PTK2    | DELETION | 0.156231  | -0.589193 |
| YJR060W   | CBF1    | DELETION | 1.609745  | -1.691781 |
| YJR066W   | TOR1    | DELETION | 0.795327  | -0.383448 |
| YJR069C   | HAM1    | DELETION | 0.155459  | 0.281472  |
| YJR070C   | LIA1    | DELETION | -3.390205 | 0.634177  |
| YJR073C   | OPI3    | DELETION | -5.003462 | -0.775403 |
| YJR074W   | MOG1    | DELETION | NaN       | NaN       |
| YJR075W   | HOC1    | DELETION | -1.086361 | -2.481619 |
| YJR082C   | EAF6    | DELETION | -0.589094 | 1.282497  |
| YJR084W   | CSN12   | DELETION | 0.318585  | 0.903838  |
| YJR088C   | EMC2    | DELETION | NaN       | NaN       |
| YJR090C   | GRR1    | DELETION | -1.920117 | -2.404198 |
| YJR094C   | IME1    | DELETION | 1.035372  | -0.4051   |
| YJR117W   | STE24   | DELETION | -2.670517 | -2.358877 |
| YJR118C   | ILM1    | DELETION | 1.889562  | 3.743779  |
| YJR119C   | JHD2    | DELETION | 0.944698  | -0.168931 |
| YJR125C   | ENT3    | DELETION | 0.364223  | 0.966714  |
| YJR126C   | VPS70   | DELETION | -1.111511 | 0.726547  |
| YJR131W   | MNS1    | DELETION | 0.273815  | -0.937133 |
| YJR134C   | SGM1    | DELETION | -0.279623 | -0.895502 |
| YJR135C   | MCM22   | DELETION | 1.807759  | 0.905098  |
| YJR139C   | HOM6    | DELETION | 0.102175  | -0.311089 |
| YJR140C   | HIR3    | DELETION | -2.564325 | 0.350961  |
| YJR145C   | RPS4A   | DELETION | 4.752271  | 3.005436  |
| YKL005C   | BYE1    | DELETION | 0.562447  | -0.1984   |
| YKL007W   | CAP1    | DELETION | 1.486382  | 0.822014  |
| YKL009W   | MRT4    | DELETION | -0.646732 | -0.675562 |
| YKL020C   | SPT23   | DELETION | 0.488325  | 1.430112  |
| YKL022C   | CDC16   | DAmP     | NaN       | NaN       |
| YKL023W   | YKL023W | DELETION | 1.309328  | -2.590899 |
| YKL025C   | PAN3    | DELETION | 0.090733  | -0.109772 |

|           |        |          |           |           |
|-----------|--------|----------|-----------|-----------|
| YKL028W   | TFA1   | DAmP     | NaN       | NaN       |
| YKL032C   | IXR1   | DELETION | NaN       | 0.876184  |
| YKL037W   | AIM26  | DELETION | -0.546993 | 1.254478  |
| YKL041W   | VPS24  | DELETION | -0.311766 | -4.556016 |
| YKL048C   | ELM1   | DELETION | -0.707083 | -0.353442 |
| YKL053C-A | MDM35  | DELETION | 2.835276  | 1.047518  |
| YKL056C   | TMA19  | DELETION | 0.698913  | 0.937051  |
| YKL059C   | MPE1   | DAmP     | NaN       | NaN       |
| YKL068W   | NUP100 | DELETION | -0.815374 | 0.323697  |
| YKL073W   | LHS1   | DELETION | -0.338833 | -0.115192 |
| YKL074C   | MUD2   | DELETION | 1.363607  | -0.502996 |
| YKL079W   | SMY1   | DELETION | -0.841612 | -0.02054  |
| YKL081W   | TEF4   | DELETION | -0.820993 | -2.441625 |
| YKL090W   | CUE2   | DELETION | -0.936525 | -1.135326 |
| YKL092C   | BUD2   | DELETION | -0.119228 | 0.182389  |
| YKL101W   | HSL1   | DELETION | -0.743109 | 0.48411   |
| YKL109W   | HAP4   | DELETION | -0.267406 | 1.985665  |
| YKL110C   | KTI12  | DELETION | 0.803682  | 0.71559   |
| YKL112W   | ABF1   | DAmP     | NaN       | NaN       |
| YKL113C   | RAD27  | DELETION | -3.286536 | -0.574881 |
| YKL120W   | OAC1   | DELETION | 0.332537  | -0.44658  |
| YKL121W   | DGR2   | DELETION | NaN       | NaN       |
| YKL139W   | CTK1   | DELETION | -1.440459 | 2.170203  |
| YKL140W   | TGL1   | DELETION | -0.596483 | -0.926012 |
| YKL149C   | DBR1   | DELETION | -0.054416 | -0.160252 |
| YKL160W   | ELF1   | DELETION | -0.487305 | 1.119031  |
| YKL166C   | TPK3   | DELETION | -0.054036 | 0.316063  |
| YKL176C   | LST4   | DELETION | -4.256371 | 0.025654  |
| YKL179C   | COY1   | DELETION | 0.693772  | 0.648524  |
| YKL185W   | ASH1   | DELETION | 0.282069  | 0.263897  |
| YKL190W   | CNB1   | DELETION | 1.165264  | -1.973946 |
| YKL197C   | PEX1   | DELETION | -1.083245 | -1.030759 |
| YKL201C   | MNN4   | DELETION | 0.990141  | 1.093728  |
| YKL204W   | EAP1   | DELETION | -3.744249 | -0.87425  |
| YKL205W   | LOS1   | DELETION | -2.530722 | -0.006743 |
| YKL206C   | ADD66  | DELETION | -0.320094 | 0.332141  |
| YKL207W   | AIM27  | DELETION | NaN       | NaN       |
| YKL208W   | CBT1   | DELETION | 0.2137    | 0.972844  |
| YKL211C   | TRP3   | DELETION | -0.403648 | 0.251788  |
| YKL212W   | SAC1   | DELETION | -0.094183 | 1.205514  |
| YKL213C   | DOA1   | DELETION | -7.51727  | -0.947493 |
| YKR001C   | VPS1   | DELETION | -0.104608 | -2.124116 |
| YKR007W   | MEH1   | DELETION | -3.311673 | -1.665848 |
| YKR008W   | RSC4   | DAmP     | NaN       | NaN       |
| YKR010C   | TOF2   | DELETION | -0.255313 | 1.133894  |
| YKR019C   | IRS4   | DELETION | -2.199761 | -2.178611 |
| YKR020W   | VPS51  | DELETION | 0.848561  | -4.603232 |

|         |         |          |           |           |
|---------|---------|----------|-----------|-----------|
| YKR024C | DBP7    | DELETION | NaN       | NaN       |
| YKR028W | SAP190  | DELETION | -0.632131 | 0.578549  |
| YKR029C | SET3    | DELETION | 0.050899  | -0.938086 |
| YKR030W | GMH1    | DELETION | -0.201992 | -0.042682 |
| YKR042W | UTH1    | DELETION | NaN       | NaN       |
| YKR043C | SHB17   | DELETION | NaN       | NaN       |
| YKR048C | NAP1    | DELETION | 0.123776  | 0.430519  |
| YKR054C | DYN1    | DELETION | 1.38514   | 0.793461  |
| YKR055W | RHO4    | DELETION | 0.788574  | -0.364582 |
| YKR059W | TIF1    | DELETION | -0.10312  | 0.456867  |
| YKR061W | KTR2    | DELETION | 0.277811  | -0.004106 |
| YKR062W | TFA2    | DAmP     | NaN       | NaN       |
| YKR065C | PAM17   | DELETION | NaN       | NaN       |
| YKR067W | GPT2    | DELETION | -0.230731 | -0.231197 |
| YKR072C | SIS2    | DELETION | -1.430687 | -0.063623 |
| YKR074W | AIM29   | DELETION | -0.629163 | 1.853044  |
| YKR077W | MSA2    | DELETION | -0.457535 | -0.249991 |
| YKR082W | NUP133  | DELETION | 1.298076  | 2.416709  |
| YKR092C | SRP40   | DELETION | 1.270271  | 1.533575  |
| YKR093W | PTR2    | DELETION | 1.769306  | 0.720586  |
| YKR095W | MLP1    | DELETION | -0.245066 | 0.259357  |
| YKR096W | YKR096W | DELETION | -0.271656 | -0.191234 |
| YKR098C | UBP11   | DELETION | 1.238751  | 1.020785  |
| YKR099W | BAS1    | DELETION | -3.17626  | -0.946345 |
| YKR100C | SKG1    | DELETION | 0.311588  | -0.209589 |
| YKR101W | SIR1    | DELETION | 1.800034  | 2.370629  |
| YKR103W | NFT1    | DELETION | 0.128853  | -0.651077 |
| YLL001W | DNM1    | DELETION | 1.105547  | 0.68442   |
| YLL002W | RTT109  | DELETION | -2.583988 | -4.651936 |
| YLL019C | KNS1    | DELETION | -0.768137 | -0.464511 |
| YLL021W | SPA2    | DELETION | 0.172166  | 0.642662  |
| YLL024C | SSA2    | DELETION | 1.076411  | -0.221959 |
| YLL038C | ENT4    | DELETION | 0.67216   | 1.452769  |
| YLL039C | UBI4    | DELETION | -0.531129 | 4.128478  |
| YLL040C | VPS13   | DELETION | 0.214732  | 0.172646  |
| YLL043W | FPS1    | DELETION | -3.787355 | -8.343255 |
| YLL045C | RPL8B   | DELETION | 4.557707  | 0.152345  |
| YLL049W | LDB18   | DELETION | 0.191831  | -0.502466 |
| YLR006C | SSK1    | DELETION | 0.921611  | -0.361316 |
| YLR015W | BRE2    | DELETION | 4.38396   | 0.018644  |
| YLR018C | POM34   | DELETION | -5.166592 | 0.780653  |
| YLR021W | IRC25   | DELETION | -4.075864 | -0.07016  |
| YLR024C | UBR2    | DELETION | -2.039039 | -2.178112 |
| YLR032W | RAD5    | DELETION | -2.215138 | -5.028918 |
| YLR033W | RSC58   | DAmP     | NaN       | NaN       |
| YLR039C | RIC1    | DELETION | -0.581242 | -0.007704 |
| YLR044C | PDC1    | DELETION | 0.71528   | -0.223702 |

|         |         |          |           |            |
|---------|---------|----------|-----------|------------|
| YLR055C | SPT8    | DELETION | NaN       | NaN        |
| YLR056W | ERG3    | DELETION | 0.789141  | -3.02228   |
| YLR071C | RGR1    | DAmP     | NaN       | NaN        |
| YLR079W | SIC1    | DELETION | -0.273194 | 0.208057   |
| YLR082C | SRL2    | DELETION | -1.062242 | -0.27087   |
| YLR083C | EMP70   | DELETION | 0.215356  | -0.339702  |
| YLR085C | ARP6    | DELETION | NaN       | NaN        |
| YLR087C | CSF1    | DELETION | NaN       | NaN        |
| YLR089C | ALT1    | DELETION | -5.748011 | 1.066297   |
| YLR091W | GEP5    | DELETION | NaN       | NaN        |
| YLR095C | IOC2    | DELETION | 0.442248  | 0.655482   |
| YLR096W | KIN2    | DELETION | 0.929677  | -0.551389  |
| YLR097C | HRT3    | DELETION | 0.047659  | -0.167293  |
| YLR102C | APC9    | DELETION | -0.150423 | -0.773085  |
| YLR110C | CCW12   | DELETION | -2.619765 | -0.744544  |
| YLR110C | CCW12   | DELETION | -2.619765 | -0.744544  |
| YLR113W | HOG1    | DELETION | 1.173628  | 1.305273   |
| YLR114C | AVL9    | DELETION | -1.352016 | 1.18796    |
| YLR119W | SRN2    | DELETION | -5.838454 | 1.316549   |
| YLR127C | APC2    | DAmP     | NaN       | NaN        |
| YLR128W | DCN1    | DELETION | -1.500499 | 1.335546   |
| YLR131C | ACE2    | DELETION | 0.933     | 0.250379   |
| YLR133W | CK11    | DELETION | 0.266567  | -0.252178  |
| YLR135W | SLX4    | DELETION | -0.521007 | -0.715024  |
| YLR146C | SPE4    | DELETION | 0.214247  | 0.20137    |
| YLR150W | STM1    | DELETION | -3.275835 | -0.600123  |
| YLR154C | RNH203  | DELETION | -1.342805 | -0.07944   |
| YLR177W | YLR177W | DELETION | 1.179327  | -0.603625  |
| YLR180W | SAM1    | DELETION | -0.258681 | -1.68213   |
| YLR181C | VTA1    | DELETION | 0.506252  | -0.865943  |
| YLR182W | SWI6    | DELETION | -9.197483 | -2.699814  |
| YLR185W | RPL37A  | DELETION | 0.331163  | -1.103239  |
| YLR190W | MMR1    | DELETION | 3.177041  | -1.230551  |
| YLR191W | PEX13   | DELETION | -1.562899 | -0.032543  |
| YLR192C | HCR1    | DELETION | -2.553026 | -0.480367  |
| YLR200W | YKE2    | DELETION | 2.799372  | 2.481989   |
| YLR206W | ENT2    | DELETION | 0.030052  | -0.863973  |
| YLR207W | HRD3    | DELETION | 0.01367   | -0.641144  |
| YLR210W | CLB4    | DELETION | -0.283949 | 0.611519   |
| YLR216C | CPR6    | DELETION | -2.487407 | 0.320859   |
| YLR219W | MSC3    | DELETION | -1.672327 | 0.38463    |
| YLR221C | RSA3    | DELETION | 1.459347  | 0.02011    |
| YLR224W | YLR224W | DELETION | 0.784144  | 0.107677   |
| YLR228C | ECM22   | DELETION | 0.393291  | 0.108967   |
| YLR233C | EST1    | DELETION | 0.209916  | -0.519354  |
| YLR234W | TOP3    | DELETION | -2.801468 | -10.903455 |
| YLR238W | FAR10   | DELETION | 0.149702  | -0.406271  |

|           |         |          |           |           |
|-----------|---------|----------|-----------|-----------|
| YLR239C   | LIP2    | DELETION | 1.582489  | 1.862995  |
| YLR242C   | ARV1    | DELETION | 2.174425  | 2.637259  |
| YLR262C   | YPT6    | DELETION | -1.137973 | -0.135274 |
| YLR264W   | RPS28B  | DELETION | 0.953745  | 0.41801   |
| YLR265C   | NEJ1    | DELETION | -0.280358 | -0.00429  |
| YLR266C   | PDR8    | DELETION | 1.538612  | 0.681886  |
| YLR267W   | BOP2    | DELETION | 0.47108   | 0.327021  |
| YLR268W   | SEC22   | DELETION | -3.388507 | -0.169587 |
| YLR273C   | PIG1    | DELETION | 1.07526   | 0.843132  |
| YLR278C   | YLR278C | DELETION | 0.561006  | 0.087352  |
| YLR287C   | YLR287C | DELETION | -0.129036 | 0.215745  |
| YLR287C-A | RPS30A  | DELETION | 0.332133  | 0.135502  |
| YLR289W   | GUF1    | DELETION | -0.284322 | 0.765364  |
| YLR292C   | SEC72   | DELETION | 0.438667  | -0.051451 |
| YLR306W   | UBC12   | DELETION | 0.392252  | -0.01862  |
| YLR312C   | QNQ1    | DELETION | 0.885365  | -2.386016 |
| YLR315W   | NKP2    | DELETION | -2.842047 | 1.007734  |
| YLR318W   | EST2    | DELETION | 0.499814  | 0.396744  |
| YLR319C   | BUD6    | DELETION | 1.45128   | 0.283806  |
| YLR320W   | MMS22   | DELETION | -8.446058 | -5.990156 |
| YLR324W   | PEX30   | DELETION | 0.005235  | 0.386966  |
| YLR330W   | CHS5    | DELETION | 0.507108  | -1.142908 |
| YLR335W   | NUP2    | DELETION | -0.011815 | 0.566436  |
| YLR337C   | VRP1    | DELETION | 1.329973  | -8.129076 |
| YLR342W   | FKS1    | DELETION | -5.517817 | 2.772453  |
| YLR350W   | ORM2    | DELETION | -1.821184 | -0.463998 |
| YLR353W   | BUD8    | DELETION | 0.32957   | 0.493831  |
| YLR357W   | RSC2    | DELETION | NaN       | -5.986378 |
| YLR360W   | VPS38   | DELETION | 0.645521  | 0.660126  |
| YLR361C   | DCR2    | DELETION | 0.176902  | 0.244556  |
| YLR363C   | NMD4    | DELETION | 0.339832  | -0.090148 |
| YLR368W   | MDM30   | DELETION | NaN       | NaN       |
| YLR370C   | ARC18   | DELETION | 1.56602   | 0.658295  |
| YLR371W   | ROM2    | DELETION | NaN       | NaN       |
| YLR372W   | SUR4    | DELETION | -5.43895  | -0.207396 |
| YLR373C   | VID22   | DELETION | 0.328424  | 0.825935  |
| YLR376C   | PSY3    | DELETION | 0.012114  | 0.533585  |
| YLR381W   | CTF3    | DELETION | 0.28203   | -0.637391 |
| YLR384C   | IKI3    | DELETION | -6.218331 | 2.293059  |
| YLR386W   | VAC14   | DELETION | 2.927654  | 2.917541  |
| YLR388W   | RPS29A  | DELETION | 0.771199  | 1.200052  |
| YLR393W   | ATP10   | DELETION | 0.061556  | -0.274455 |
| YLR394W   | CST9    | DELETION | -1.179627 | 0.963339  |
| YLR398C   | SKI2    | DELETION | 0.369287  | -0.296259 |
| YLR399C   | BDF1    | DELETION | 1.082351  | -8.508285 |
| YLR401C   | DUS3    | DELETION | 0.31353   | 0.202108  |
| YLR410W   | VIP1    | DELETION | -8.383802 | 1.291215  |

|         |       |          |           |            |
|---------|-------|----------|-----------|------------|
| YLR418C | CDC73 | DELETION | 3.843433  | 0.487502   |
| YLR421C | RPN13 | DELETION | 0.045502  | 1.073673   |
| YLR423C | ATG17 | DELETION | 0.759522  | -0.111654  |
| YLR425W | TUS1  | DELETION | 0.092813  | 0.099599   |
| YLR426W | TDA5  | DELETION | NaN       | NaN        |
| YLR429W | CRN1  | DELETION | -0.210024 | 0.054755   |
| YLR435W | TSR2  | DELETION | NaN       | -3.604215  |
| YLR436C | ECM30 | DELETION | -1.791569 | -0.63      |
| YLR442C | SIR3  | DELETION | NaN       | NaN        |
| YLR450W | HMG2  | DELETION | -0.362562 | -0.274281  |
| YLR452C | SST2  | DELETION | 1.023501  | -1.087586  |
| YLR454W | FMP27 | DELETION | -0.463701 | 0.440538   |
| YML001W | YPT7  | DELETION | -0.274281 | 3.069473   |
| YML007W | YAP1  | DELETION | 0.889523  | -0.005614  |
| YML008C | ERG6  | DELETION | 0.301641  | -0.086858  |
| YML012W | ERV25 | DELETION | 0.35489   | -0.23597   |
| YML013W | UBX2  | DELETION | 1.150242  | 0.953442   |
| YML015C | TAF11 | DAmP     | NaN       | NaN        |
| YML016C | PPZ1  | DELETION | NaN       | NaN        |
| YML017W | PSP2  | DELETION | -1.909412 | 0.374326   |
| YML019W | OST6  | DELETION | -0.44482  | -2.064544  |
| YML022W | APT1  | DELETION | 0.930474  | 1.621877   |
| YML028W | TSA1  | DELETION | -8.336366 | -14.827876 |
| YML029W | USA1  | DELETION | 0.431668  | 0.249506   |
| YML032C | RAD52 | DELETION | -5.050514 | -10.639408 |
| YML034W | SRC1  | DELETION | 1.634332  | -0.224826  |
| YML035C | AMD1  | DELETION | 0.922198  | -0.681414  |
| YML038C | YMD8  | DELETION | 0.065584  | -0.15582   |
| YML041C | VPS71 | DELETION | NaN       | NaN        |
| YML047C | PRM6  | DELETION | 0.559984  | 1.310458   |
| YML048W | GSF2  | DELETION | -3.029113 | -0.137207  |
| YML050W | AIM32 | DELETION | 0.047675  | -0.96014   |
| YML051W | GAL80 | DELETION | NaN       | NaN        |
| YML055W | SPC2  | DELETION | -0.836803 | -1.408525  |
| YML057W | CMP2  | DELETION | -0.031258 | -0.43959   |
| YML059C | NTE1  | DELETION | -0.060635 | -0.477415  |
| YML062C | MFT1  | DELETION | -0.752683 | -1.401714  |
| YML063W | RPS1B | DELETION | NaN       | NaN        |
| YML065W | ORC1  | DAmP     | NaN       | NaN        |
| YML066C | SMA2  | DELETION | 0.009962  | 0.413172   |
| YML067C | ERV41 | DELETION | 0.230594  | -1.527397  |
| YML071C | COG8  | DELETION | -0.900908 | 0.309772   |
| YML072C | TCB3  | DELETION | 0.24653   | -0.6552    |
| YML075C | HMG1  | DELETION | 0.413839  | 0.619044   |
| YML088W | UFO1  | DELETION | 0.507511  | 0.008888   |
| YML094W | GIM5  | DELETION | 5.686072  | 1.939478   |
| YML095C | RAD10 | DELETION | 0.634313  | 0.191372   |



|         |         |          |           |           |
|---------|---------|----------|-----------|-----------|
| YML097C | VPS9    | DELETION | -6.819236 | -2.267079 |
| YML098W | TAF13   | DAmP     | NaN       | NaN       |
| YML100W | TSL1    | DELETION | 0.899969  | -0.020032 |
| YML101C | CUE4    | DELETION | 0.728541  | -0.715968 |
| YML102W | CAC2    | DELETION | NaN       | -1.434175 |
| YML103C | NUP188  | DELETION | -4.774335 | 3.086122  |
| YML107C | PML39   | DELETION | -0.901939 | -1.279674 |
| YML108W | YML108W | DELETION | 0.557676  | -0.476027 |
| YML111W | BUL2    | DELETION | -0.244298 | 0.01219   |
| YML112W | CTK3    | DELETION | -3.01002  | -2.818249 |
| YML114C | TAF8    | DAmP     | NaN       | NaN       |
| YML117W | NAB6    | DELETION | -0.484722 | -1.455225 |
| YML119W | YML119W | DELETION | 0.446214  | 0.031257  |
| YML121W | GTR1    | DELETION | -1.838564 | 1.587326  |
| YML123C | PHO84   | DELETION | -0.11063  | -0.297953 |
| YML124C | TUB3    | DELETION | 2.807968  | 1.242034  |
| YML128C | MSC1    | DELETION | NaN       | -1.602887 |
| YMR003W | AIM34   | DELETION | 0.547936  | 0.125842  |
| YMR004W | MVP1    | DELETION | 0.505077  | -2.456412 |
| YMR005W | TAF4    | DAmP     | NaN       | NaN       |
| YMR010W | YMR010W | DELETION | -0.483464 | 0.648753  |
| YMR015C | ERG5    | DELETION | -1.019094 | -2.772171 |
| YMR016C | SOK2    | DELETION | 0.93493   | 1.951192  |
| YMR022W | UBC7    | DELETION | -0.016822 | -0.493588 |
| YMR026C | PEX12   | DELETION | 0.004652  | -0.70388  |
| YMR029C | FAR8    | DELETION | -0.511065 | 1.279305  |
| YMR035W | IMP2    | DELETION | NaN       | NaN       |
| YMR036C | MIH1    | DELETION | 0.085735  | 1.251077  |
| YMR038C | CCS1    | DELETION | NaN       | NaN       |
| YMR039C | SUB1    | DELETION | -0.644087 | 0.25765   |
| YMR042W | ARG80   | DELETION | 0.677098  | 0.367055  |
| YMR048W | CSM3    | DELETION | -0.573396 | 1.351104  |
| YMR052W | FAR3    | DELETION | 0.02837   | 0.155657  |
| YMR054W | STV1    | DELETION | -1.497848 | -0.525508 |
| YMR055C | BUB2    | DELETION | 0.529534  | -0.753166 |
| YMR058W | FET3    | DELETION | -0.098769 | 1.439168  |
| YMR060C | SAM37   | DELETION | 0.898751  | 0.996003  |
| YMR065W | KAR5    | DELETION | 0.304816  | -0.609238 |
| YMR067C | UBX4    | DELETION | -1.654404 | -0.030883 |
| YMR068W | AVO2    | DELETION | -0.306377 | -0.44219  |
| YMR070W | MOT3    | DELETION | -1.150035 | 0.932151  |
| YMR073C | IRC21   | DELETION | -2.807091 | -3.105209 |
| YMR075W | RCO1    | DELETION | 2.730859  | -0.186187 |
| YMR078C | CTF18   | DELETION | NaN       | NaN       |
| YMR080C | NAM7    | DELETION | -1.925453 | -1.259639 |
| YMR092C | AIP1    | DELETION | -1.295174 | 0.42306   |
| YMR100W | MUB1    | DELETION | 0.568572  | -1.163526 |

|         |         |          |            |            |
|---------|---------|----------|------------|------------|
| YMR102C | YMR102C | DELETION | 1.585338   | -0.412949  |
| YMR106C | YKU80   | DELETION | -0.084156  | 0.453893   |
| YMR109W | MYO5    | DELETION | 0.230722   | -0.7913    |
| YMR111C | YMR111C | DELETION | -1.690911  | 0.196571   |
| YMR116C | ASC1    | DELETION | NaN        | -4.482619  |
| YMR119W | ASH1    | DELETION | 1.088893   | 0.223016   |
| YMR121C | RPL15B  | DELETION | 1.163517   | 1.610148   |
| YMR123W | PKR1    | DELETION | -0.100807  | -1.290594  |
| YMR127C | SAS2    | DELETION | 0.516136   | -0.708193  |
| YMR129W | POM152  | DELETION | 0.887865   | 0.007266   |
| YMR133W | REC114  | DELETION | -0.051785  | -0.520508  |
| YMR138W | CIN4    | DELETION | -0.788168  | 0.926946   |
| YMR143W | RPS16A  | DELETION | -0.360674  | 0.004339   |
| YMR153W | NUP53   | DELETION | -0.237207  | -0.142285  |
| YMR154C | RIM13   | DELETION | -4.763853  | -0.529001  |
| YMR161W | HLJ1    | DELETION | -0.146178  | -0.779256  |
| YMR172W | HOT1    | DELETION | -0.315819  | 0.518157   |
| YMR176W | ECM5    | DELETION | -0.614068  | 0.840372   |
| YMR179W | SPT21   | DELETION | -2.903431  | 1.126801   |
| YMR186W | HSC82   | DELETION | -1.06337   | 0.266741   |
| YMR190C | SGS1    | DELETION | -1.536466  | 0.494046   |
| YMR198W | CIK1    | DELETION | -4.491977  | -0.681722  |
| YMR199W | CLN1    | DELETION | -1.24813   | -1.191225  |
| YMR201C | RAD14   | DELETION | -2.97779   | -1.018825  |
| YMR202W | ERG2    | DELETION | 1.063172   | -2.12661   |
| YMR205C | PFK2    | DELETION | -0.080518  | 0.112498   |
| YMR209C | YMR209C | DELETION | -0.550289  | 0.34355    |
| YMR214W | SCJ1    | DELETION | -0.185871  | -1.576159  |
| YMR216C | SKY1    | DELETION | -2.797276  | 0.248074   |
| YMR219W | ESC1    | DELETION | -0.071826  | 0.642564   |
| YMR223W | UBP8    | DELETION | 0.685959   | 0.58747    |
| YMR224C | MRE11   | DELETION | -4.310476  | -10.497706 |
| YMR227C | TAF7    | DAmP     | NaN        | NaN        |
| YMR230W | RPS10B  | DELETION | 1.202483   | 0.788897   |
| YMR231W | PEP5    | DELETION | -0.694605  | 1.527041   |
| YMR236W | TAF9    | DAmP     | NaN        | NaN        |
| YMR247C | RKR1    | DELETION | -0.399509  | 0.400462   |
| YMR255W | GFD1    | DELETION | 0.859806   | 1.319185   |
| YMR263W | SAP30   | DELETION | -10.103703 | 1.250255   |
| YMR264W | CUE1    | DELETION | -0.896711  | -0.223326  |
| YMR266W | RSN1    | DELETION | -0.17674   | -0.344674  |
| YMR269W | TMA23   | DELETION | -0.173673  | 0.093861   |
| YMR272C | SCS7    | DELETION | -1.973265  | -1.543941  |
| YMR273C | ZDS1    | DELETION | -1.453198  | 0.194441   |
| YMR274C | RCE1    | DELETION | -1.729446  | 1.334016   |
| YMR275C | BUL1    | DELETION | -3.42755   | -0.951941  |
| YMR277W | FCP1    | DAmP     | NaN        | NaN        |

|         |        |          |           |           |
|---------|--------|----------|-----------|-----------|
| YMR280C | CAT8   | DELETION | -0.415314 | -0.677367 |
| YMR282C | AEP2   | DELETION | -0.650789 | -1.446822 |
| YMR283C | RIT1   | DELETION | -1.198278 | 0.389682  |
| YMR284W | YKU70  | DELETION | -0.884211 | 0.199739  |
| YMR285C | NGL2   | DELETION | 0.542441  | 1.411618  |
| YMR292W | GOT1   | DELETION | 0.349962  | -0.204978 |
| YMR294W | JNM1   | DELETION | 2.853592  | 0.445348  |
| YMR299C | DYN3   | DELETION | 0.694536  | -0.085722 |
| YMR304W | UBP15  | DELETION | -2.714281 | -1.029655 |
| YMR307W | GAS1   | DELETION | -3.402495 | -1.566533 |
| YMR312W | ELP6   | DELETION | -5.102987 | 1.210012  |
| YNL001W | DOM34  | DELETION | -1.008384 | 0.969351  |
| YNL008C | ASI3   | DELETION | 0.685535  | -0.152596 |
| YNL016W | PUB1   | DELETION | -0.493802 | 1.178188  |
| YNL021W | HDA1   | DELETION | 2.397234  | 0.316241  |
| YNL025C | SSN8   | DELETION | -1.491255 | 3.445448  |
| YNL027W | CRZ1   | DELETION | 1.15431   | -1.604325 |
| YNL030W | HHF2   | DELETION | 0.373743  | 0.07055   |
| YNL031C | HHT2   | DELETION | -0.419988 | -0.408743 |
| YNL032W | SIW14  | DELETION | 2.654089  | 0.173098  |
| YNL037C | IDH1   | DELETION | -0.418563 | 0.593662  |
| YNL041C | COG6   | DELETION | -0.449725 | 0.684646  |
| YNL044W | YIP3   | DELETION | 0.48691   | -0.047002 |
| YNL049C | SFB2   | DELETION | 0.488777  | -0.827873 |
| YNL051W | COG5   | DELETION | -1.375825 | -0.609228 |
| YNL053W | MSG5   | DELETION | 1.076753  | -0.667639 |
| YNL054W | VAC7   | DELETION | 1.701568  | 0.488296  |
| YNL064C | YDJ1   | DELETION | 0.296401  | -0.486106 |
| YNL068C | FKH2   | DELETION | -0.236654 | 0.679349  |
| YNL069C | RPL16B | DELETION | 0.643253  | -1.09986  |
| YNL070W | TOM7   | DELETION | -0.30202  | 0.150476  |
| YNL071W | LAT1   | DELETION | -0.320133 | 1.656632  |
| YNL072W | RNH201 | DELETION | -0.413027 | 0.2178    |
| YNL076W | MKS1   | DELETION | -3.754923 | 0.676077  |
| YNL079C | TPM1   | DELETION | -4.259455 | 2.224791  |
| YNL080C | EOS1   | DELETION | NaN       | NaN       |
| YNL082W | PMS1   | DELETION | NaN       | NaN       |
| YNL086W | SNN1   | DELETION | NaN       | NaN       |
| YNL087W | TCB2   | DELETION | -0.173727 | 0.274855  |
| YNL097C | PHO23  | DELETION | -5.010898 | 1.5526    |
| YNL098C | RAS2   | DELETION | 0.368873  | 0.741653  |
| YNL099C | OCA1   | DELETION | 1.87108   | -0.766651 |
| YNL106C | INP52  | DELETION | -0.855111 | 2.015049  |
| YNL107W | YAF9   | DELETION | NaN       | NaN       |
| YNL116W | DMA2   | DELETION | 1.93933   | -0.532141 |
| YNL119W | NCS2   | DELETION | NaN       | NaN       |
| YNL128W | TEP1   | DELETION | NaN       | NaN       |

|         |        |          |           |           |
|---------|--------|----------|-----------|-----------|
| YNL135C | FPR1   | DELETION | -1.665232 | -0.816572 |
| YNL136W | EAF7   | DELETION | NaN       | NaN       |
| YNL147W | LSM7   | DELETION | -4.505081 | 0.861577  |
| YNL153C | GIM3   | DELETION | 2.043472  | 0.275302  |
| YNL154C | YCK2   | DELETION | -0.234156 | 0.165999  |
| YNL166C | BNI5   | DELETION | 0.176995  | 0.75355   |
| YNL167C | SKO1   | DELETION | -0.185172 | 0.48133   |
| YNL172W | APC1   | DAmP     | NaN       | NaN       |
| YNL183C | NPR1   | DELETION | -2.119944 | 0.600443  |
| YNL192W | CHS1   | DELETION | -0.258321 | -1.33491  |
| YNL197C | WHI3   | DELETION | -7.517496 | -7.968208 |
| YNL199C | GCR2   | DELETION | -6.481941 | 0.027959  |
| YNL201C | PSY2   | DELETION | -2.629532 | -0.367671 |
| YNL206C | RTT106 | DELETION | -2.0033   | 0.138875  |
| YNL214W | PEX17  | DELETION | -0.493939 | 1.62975   |
| YNL215W | IES2   | DELETION | -0.338696 | 2.727295  |
| YNL218W | MGS1   | DELETION | -1.649769 | 1.694953  |
| YNL219C | ALG9   | DELETION | -0.863859 | -0.556922 |
| YNL224C | SQS1   | DELETION | 0.960251  | 1.565473  |
| YNL227C | JJJ1   | DELETION | -0.871636 | 1.556761  |
| YNL229C | URE2   | DELETION | 0.164506  | 0.708551  |
| YNL230C | ELA1   | DELETION | -0.228968 | -0.162786 |
| YNL231C | PDR16  | DELETION | -0.839177 | -1.300676 |
| YNL233W | BNI4   | DELETION | -1.299135 | 0.279108  |
| YNL236W | SIN4   | DELETION | NaN       | NaN       |
| YNL238W | KEX2   | DELETION | 0.36476   | 1.434888  |
| YNL246W | VPS75  | DELETION | 2.605592  | 2.093228  |
| YNL253W | TEX1   | DELETION | -2.109392 | -0.864284 |
| YNL255C | GIS2   | DELETION | 0.26165   | 1.869771  |
| YNL262W | POL2   | DAmP     | NaN       | NaN       |
| YNL270C | ALP1   | DELETION | NaN       | NaN       |
| YNL271C | BNI1   | DELETION | NaN       | NaN       |
| YNL273W | TOF1   | DELETION | -0.748038 | 1.481873  |
| YNL278W | CAF120 | DELETION | 0.016623  | -0.192027 |
| YNL284C | MRPL10 | DELETION | 0.759579  | 1.672527  |
| YNL288W | CAF40  | DELETION | 1.796735  | 1.772435  |
| YNL291C | MID1   | DELETION | 1.203431  | -2.874629 |
| YNL292W | PUS4   | DELETION | -0.612815 | -0.486502 |
| YNL294C | RIM21  | DELETION | -5.18198  | -2.703728 |
| YNL297C | MON2   | DELETION | -0.740408 | 0.872485  |
| YNL298W | CLA4   | DELETION | -5.72933  | 0.118174  |
| YNL299W | TRF5   | DELETION | 0.394818  | 1.040406  |
| YNL302C | RPS19B | DELETION | -1.619383 | -0.1017   |
| YNL307C | MCK1   | DELETION | -0.538559 | 1.264765  |
| YNL309W | STB1   | DELETION | 1.14318   | 0.390034  |
| YNL311C | SKP2   | DELETION | NaN       | NaN       |
| YNL315C | ATP11  | DELETION | 0.081296  | -0.58511  |

|         |         |          |           |           |
|---------|---------|----------|-----------|-----------|
| YNL322C | KRE1    | DELETION | -0.393849 | 0.187339  |
| YNL323W | LEM3    | DELETION | -0.414548 | -1.252149 |
| YNL325C | FIG4    | DELETION | 0.193765  | 0.680085  |
| YNL329C | PEX6    | DELETION | 0.821984  | -0.008406 |
| YNL330C | RPD3    | DELETION | -0.840419 | -0.48333  |
| YNR004W | SWM2    | DELETION | NaN       | NaN       |
| YNR006W | VPS27   | DELETION | -4.623396 | -2.465668 |
| YNR010W | CSE2    | DELETION | -7.182154 | -4.290287 |
| YNR020C | ATP23   | DELETION | 1.016473  | -0.443641 |
| YNR030W | ALG12   | DELETION | 0.007727  | -0.315491 |
| YNR031C | SSK2    | DELETION | 0.219815  | -0.049323 |
| YNR032W | PPG1    | DELETION | 1.375713  | -0.023006 |
| YNR041C | COQ2    | DELETION | 0.113802  | -0.635663 |
| YNR047W | FPK1    | DELETION | NaN       | NaN       |
| YNR051C | BRE5    | DELETION | -2.455164 | -0.519881 |
| YNR052C | POP2    | DELETION | NaN       | NaN       |
| YNR060W | FRE4    | DELETION | 0.169724  | 0.280312  |
| YNR065C | YNR065C | DELETION | 0.84409   | -0.07476  |
| YNR072W | HXT17   | DELETION | 0.441648  | 1.638884  |
| YOL001W | PHO80   | DELETION | NaN       | NaN       |
| YOL003C | PFA4    | DELETION | -0.233107 | -0.704116 |
| YOL004W | SIN3    | DELETION | -2.771279 | 1.60773   |
| YOL005C | RPB11   | DAmP     | NaN       | NaN       |
| YOL006C | TOP1    | DELETION | -0.875079 | -2.9716   |
| YOL009C | MDM12   | DELETION | 2.754212  | 2.647554  |
| YOL011W | PLB3    | DELETION | -0.314217 | 0.151015  |
| YOL012C | HTZ1    | DELETION | -9.49752  | 1.359543  |
| YOL013C | HRD1    | DELETION | 0.972662  | -0.231855 |
| YOL017W | ESC8    | DELETION | -0.136625 | -0.808515 |
| YOL018C | TLG2    | DELETION | -0.496012 | -2.831357 |
| YOL020W | TAT2    | DELETION | NaN       | NaN       |
| YOL027C | MDM38   | DELETION | 0.458505  | 1.508432  |
| YOL031C | SIL1    | DELETION | 0.091734  | -0.138414 |
| YOL032W | OPI10   | DELETION | -0.621802 | -1.331929 |
| YOL041C | NOP12   | DELETION | 0.511034  | -0.538315 |
| YOL044W | PEX15   | DELETION | -1.732112 | -0.890001 |
| YOL045W | PSK2    | DELETION | 0.696618  | 1.449798  |
| YOL049W | GSH2    | DELETION | -0.693415 | 0.744353  |
| YOL051W | GAL11   | DELETION | 0.291111  | 0.033647  |
| YOL054W | PSH1    | DELETION | 0.790591  | 0.581371  |
| YOL061W | PRS5    | DELETION | 1.253125  | -0.55153  |
| YOL062C | APM4    | DELETION | -0.047057 | -0.902812 |
| YOL064C | MET22   | DELETION | -0.641747 | 1.403247  |
| YOL065C | INP54   | DELETION | 0.75182   | 0.557954  |
| YOL067C | RTG1    | DELETION | -2.501888 | -1.356246 |
| YOL068C | HST1    | DELETION | 2.863917  | 0.751101  |
| YOL080C | REX4    | DELETION | -0.257289 | 0.28722   |

|         |       |          |           |           |
|---------|-------|----------|-----------|-----------|
| YOL081W | IRA2  | DELETION | -2.391934 | -9.095616 |
| YOL090W | MSH2  | DELETION | -0.585849 | 0.574253  |
| YOL093W | TRM10 | DELETION | 0.115509  | 0.42339   |
| YOL108C | INO4  | DELETION | 0.337529  | -1.117854 |
| YOL111C | MDY2  | DELETION | NaN       | NaN       |
| YOL115W | PAP2  | DELETION | 1.392707  | -0.007853 |
| YOL116W | MSN1  | DELETION | 0.048477  | -0.06343  |
| YOL133W | HRT1  | DAmP     | NaN       | NaN       |
| YOL135C | MED7  | DAmP     | NaN       | NaN       |
| YOL148C | SPT20 | DELETION | NaN       | NaN       |
| YOR001W | RRP6  | DELETION | NaN       | NaN       |
| YOR002W | ALG6  | DELETION | -0.388683 | -0.367908 |
| YOR006C | TSR3  | DELETION | 0.016009  | 0.948097  |
| YOR008C | SLG1  | DELETION | 0.056149  | -0.023284 |
| YOR014W | RTS1  | DELETION | -1.398408 | -0.537508 |
| YOR016C | ERP4  | DELETION | -0.378531 | -0.442738 |
| YOR023C | AHC1  | DELETION | 0.906622  | 0.24092   |
| YOR025W | HST3  | DELETION | -0.002306 | -0.733979 |
| YOR026W | BUB3  | DELETION | 2.386151  | 3.309648  |
| YOR027W | STI1  | DELETION | 0.167374  | 1.258863  |
| YOR030W | DFG16 | DELETION | NaN       | NaN       |
| YOR033C | EXO1  | DELETION | NaN       | NaN       |
| YOR034C | AKR2  | DELETION | 1.309699  | -1.165315 |
| YOR035C | SHE4  | DELETION | NaN       | NaN       |
| YOR038C | HIR2  | DELETION | -1.214292 | -1.057861 |
| YOR039W | CKB2  | DELETION | NaN       | NaN       |
| YOR042W | CUE5  | DELETION | 0.360251  | -0.332898 |
| YOR043W | WHI2  | DELETION | 0.309101  | -2.233052 |
| YOR047C | STD1  | DELETION | 0.65573   | -0.72013  |
| YOR057W | SGT1  | DAmP     | NaN       | NaN       |
| YOR058C | ASE1  | DELETION | -7.008133 | NaN       |
| YOR061W | CKA2  | DELETION | 1.345752  | -0.266512 |
| YOR064C | YNG1  | DELETION | 0.377954  | 0.554221  |
| YOR065W | CYT1  | DELETION | -0.637709 | -1.025602 |
| YOR067C | ALG8  | DELETION | -0.423491 | 0.037175  |
| YOR068C | VAM10 | DELETION | -2.320055 | -3.199994 |
| YOR069W | VPS5  | DELETION | -1.559693 | 0.517672  |
| YOR070C | GYP1  | DELETION | 0.679309  | -0.85363  |
| YOR076C | SKI7  | DELETION | -0.062759 | 0.604642  |
| YOR078W | BUD21 | DELETION | 0.912707  | -0.735376 |
| YOR080W | DIA2  | DELETION | -1.656743 | 1.481005  |
| YOR083W | WHI5  | DELETION | -1.558211 | -0.060148 |
| YOR085W | OST3  | DELETION | -2.09988  | -3.232497 |
| YOR089C | VPS21 | DELETION | -1.113145 | 3.223016  |
| YOR101W | RAS1  | DELETION | 0.715362  | 0.332974  |
| YOR106W | VAM3  | DELETION | 0.272897  | -2.689811 |
| YOR109W | INP53 | DELETION | 0.179648  | -0.24459  |

|           |         |               |           |           |
|-----------|---------|---------------|-----------|-----------|
| YOR112W   | CEX1    | DELETION      | 0.905621  | 0.503271  |
| YOR113W   | AZF1    | DELETION      | -0.447004 | -0.896272 |
| YOR115C   | TRS33   | DELETION      | 0.04063   | -0.346441 |
| YOR123C   | LEO1    | DELETION      | -0.195031 | -1.300891 |
| YOR124C   | UBP2    | DELETION      | -1.367402 | 0.175455  |
| YOR127W   | RGA1    | DELETION      | 0.26947   | -0.211615 |
| YOR132W   | VPS17   | DELETION      | -1.703698 | -1.1787   |
| YOR140W   | SFL1    | DELETION      | 1.591365  | 0.944808  |
| YOR141C   | ARP8    | DELETION      | NaN       | NaN       |
| YOR144C   | ELG1    | DELETION      | -0.273173 | 0.415005  |
| YOR151C   | RPB2    | DAmP          | NaN       | NaN       |
| YOR154W   | SLP1    | DELETION      | 0.286247  | 0.534545  |
| YOR156C   | NFI1    | DELETION      | -0.400818 | 1.535956  |
| YOR158W   | PET123  | DELETION      | -2.142548 | 0.219957  |
| YOR165W   | SEY1    | DELETION      | -0.049078 | 0.810671  |
| YOR171C   | LCB4    | DELETION      | 0.570623  | -0.10911  |
| YOR174W   | MED4    | DAmP          | NaN       | NaN       |
| YOR178C   | GAC1    | DELETION      | 1.201618  | 1.123865  |
| YOR179C   | SYC1    | DELETION      | -1.681703 | -0.494866 |
| YOR184W   | SER1    | DELETION      | 0.97784   | -0.777515 |
| YOR189W   | IES4    | DELETION      | NaN       | NaN       |
| YOR191W   | ULS1    | DELETION      | 1.075517  | -0.573305 |
| YOR195W   | SLK19   | DELETION      | NaN       | NaN       |
| YOR202W   | WT_HIS3 | WT_his3D::KAN | NaN       | NaN       |
| YOR202W   | WT_HIS3 | WT_his3D::KAN | NaN       | NaN       |
| YOR208W   | PTP2    | DELETION      | -0.285541 | -4.84271  |
| YOR209C   | NPT1    | DELETION      | NaN       | NaN       |
| YOR213C   | SAS5    | DELETION      | 0.941515  | 0.282672  |
| YOR216C   | RUD3    | DELETION      | -1.601882 | -0.308812 |
| YOR224C   | RPB8    | DAmP          | NaN       | NaN       |
| YOR231W   | MKK1    | DELETION      | -0.585877 | -0.442403 |
| YOR233W   | KIN4    | DELETION      | 0.059028  | -0.069499 |
| YOR234C   | RPL33B  | DELETION      | -0.752044 | 0.41109   |
| YOR243C   | PUS7    | DELETION      | -0.866461 | 1.033638  |
| YOR244W   | ESA1    | DAmP          | NaN       | NaN       |
| YOR249C   | APC5    | DAmP          | NaN       | NaN       |
| YOR264W   | DSE3    | DELETION      | -0.456627 | -0.329804 |
| YOR265W   | RBL2    | DELETION      | 1.308359  | -0.789889 |
| YOR266W   | PNT1    | DELETION      | -1.567508 | 1.354944  |
| YOR269W   | PAC1    | DELETION      | 2.541759  | 0.507412  |
| YOR275C   | RIM20   | DELETION      | -8.055753 | -1.770642 |
| YOR284W   | HUA2    | DELETION      | -0.646705 | 0.406088  |
| YOR288C   | MPD1    | DELETION      | 0.708934  | 1.315822  |
| YOR290C   | SNF2    | DELETION      | NaN       | NaN       |
| YOR297C   | TIM18   | DELETION      | 0.603532  | -0.106849 |
| YOR298C-A | MBF1    | DELETION      | 0.282467  | 0.014669  |
| YOR303W   | CPA1    | DELETION      | NaN       | NaN       |

|         |         |          |           |           |
|---------|---------|----------|-----------|-----------|
| YOR304W | ISW2    | DELETION | -0.479326 | -0.035628 |
| YOR307C | SLY41   | DELETION | -0.027493 | -0.546029 |
| YOR308C | SNU66   | DELETION | 1.098774  | 1.237393  |
| YOR311C | DGK1    | DELETION | -0.344406 | -0.065544 |
| YOR312C | RPL20B  | DELETION | 1.113656  | -3.684463 |
| YOR321W | PMT3    | DELETION | 0.807994  | 0.144395  |
| YOR322C | LDB19   | DELETION | -2.540603 | 1.481695  |
| YOR327C | SNC2    | DELETION | 2.530405  | 0.336297  |
| YOR330C | MIP1    | DELETION | -1.759965 | 0.672569  |
| YOR339C | UBC11   | DELETION | 0.047753  | -0.728278 |
| YOR342C | YOR342C | DELETION | 0.524115  | -0.545518 |
| YOR344C | TYE7    | DELETION | -0.040624 | -0.200669 |
| YOR346W | REV1    | DELETION | -0.102709 | -0.769826 |
| YOR349W | CIN1    | DELETION | 1.18091   | 0.063712  |
| YOR355W | GDS1    | DELETION | -3.754285 | -0.329196 |
| YOR358W | HAP5    | DELETION | -1.394826 | -3.194707 |
| YOR360C | PDE2    | DELETION | -2.080973 | -4.263327 |
| YOR368W | RAD17   | DELETION | 0.669785  | -0.942942 |
| YOR371C | GPB1    | DELETION | 0.006034  | -0.937149 |
| YPL001W | HAT1    | DELETION | 1.59482   | 0.320571  |
| YPL008W | CHL1    | DELETION | 0.380443  | 0.566257  |
| YPL011C | TAF3    | DAmP     | NaN       | NaN       |
| YPL017C | IRC15   | DELETION | -0.135617 | 0.016262  |
| YPL018W | CTF19   | DELETION | 1.624735  | 0.785996  |
| YPL022W | RAD1    | DELETION | -0.25835  | -2.479805 |
| YPL024W | RMI1    | DELETION | -0.229641 | -1.14559  |
| YPL037C | EGD1    | DELETION | 0.523603  | -0.542734 |
| YPL041C | YPL041C | DELETION | 0.036612  | -0.01042  |
| YPL042C | SSN3    | DELETION | NaN       | NaN       |
| YPL046C | ELC1    | DELETION | 0.462883  | 0.8987    |
| YPL047W | SGF11   | DELETION | 1.100026  | -0.513452 |
| YPL051W | ARL3    | DELETION | 0.008182  | -1.327201 |
| YPL055C | LGE1    | DELETION | 3.666449  | 0.486144  |
| YPL057C | SUR1    | DELETION | -0.252903 | -2.902233 |
| YPL068C | YPL068C | DELETION | -1.062032 | 0.831591  |
| YPL069C | BTS1    | DELETION | 4.802655  | 5.548292  |
| YPL072W | UBP16   | DELETION | 0.297027  | -0.184165 |
| YPL079W | RPL21B  | DELETION | -5.807298 | -6.544859 |
| YPL086C | ELP3    | DELETION | -3.919586 | 1.977073  |
| YPL089C | RLM1    | DELETION | 0.671406  | 0.805649  |
| YPL090C | RPS6A   | DELETION | -2.869618 | 2.027934  |
| YPL100W | ATG21   | DELETION | 0.062619  | 0.163023  |
| YPL101W | ELP4    | DELETION | -8.184383 | 1.611163  |
| YPL106C | SSE1    | DELETION | -2.101482 | 0.656551  |
| YPL113C | YPL113C | DELETION | 0.32701   | -1.839996 |
| YPL115C | BEM3    | DELETION | 0.127554  | 1.063784  |
| YPL116W | HOS3    | DELETION | 0.48517   | -0.861844 |



|         |         |          |           |           |
|---------|---------|----------|-----------|-----------|
| YPL119C | DBP1    | DELETION | 0.148096  | -0.522877 |
| YPL120W | VPS30   | DELETION | -0.583208 | 1.43023   |
| YPL122C | TFB2    | DAmP     | NaN       | NaN       |
| YPL125W | KAP120  | DELETION | -1.529336 | 0.873625  |
| YPL127C | HHO1    | DELETION | 1.579359  | -0.828053 |
| YPL138C | SPP1    | DELETION | 1.658599  | -0.433677 |
| YPL138C | SPP1    | DELETION | 1.658599  | -0.433677 |
| YPL139C | UME1    | DELETION | -3.16657  | 0.547362  |
| YPL140C | MKK2    | DELETION | 0.412989  | 0.822531  |
| YPL141C | FRK1    | DELETION | NaN       | NaN       |
| YPL144W | POC4    | DELETION | -7.806606 | -6.989074 |
| YPL150W | YPL150W | DELETION | -0.070166 | -0.703175 |
| YPL152W | RRD2    | DELETION | -1.310434 | -1.579454 |
| YPL155C | KIP2    | DELETION | 0.380806  | -0.535657 |
| YPL157W | TGS1    | DELETION | -0.322104 | -2.918468 |
| YPL158C | AIM44   | DELETION | 1.561318  | -0.243467 |
| YPL161C | BEM4    | DELETION | -1.423045 | 1.244986  |
| YPL165C | SET6    | DELETION | 0.354515  | 1.725483  |
| YPL167C | REV3    | DELETION | -0.103898 | -1.453373 |
| YPL172C | COX10   | DELETION | 0.082757  | 0.178828  |
| YPL174C | NIP100  | DELETION | 1.66271   | 0.755161  |
| YPL177C | CUP9    | DELETION | -1.643501 | -0.718304 |
| YPL178W | CBC2    | DELETION | NaN       | NaN       |
| YPL180W | TCO89   | DELETION | -2.93906  | 2.007348  |
| YPL181W | CTI6    | DELETION | -1.24786  | -0.254061 |
| YPL183C | RTT10   | DELETION | -1.015428 | 0.119796  |
| YPL184C | MRN1    | DELETION | 0.429789  | 0.151672  |
| YPL189W | GUP2    | DELETION | 0.096066  | -0.945646 |
| YPL192C | PRM3    | DELETION | 0.05059   | -0.374867 |
| YPL194W | DDC1    | DELETION | 0.2856    | -1.041847 |
| YPL195W | APL5    | DELETION | -0.428954 | -1.024077 |
| YPL196W | OXR1    | DELETION | -0.443951 | -0.818326 |
| YPL212C | PUS1    | DELETION | 0.653045  | 1.182057  |
| YPL213W | LEA1    | DELETION | 1.30024   | 0.04146   |
| YPL214C | THI6    | DELETION | 2.026002  | 0.633957  |
| YPL226W | NEW1    | DELETION | 0.685597  | -0.436415 |
| YPL227C | ALG5    | DELETION | -0.695541 | -0.481214 |
| YPL239W | YAR1    | DELETION | -0.281041 | 1.256782  |
| YPL241C | CIN2    | DELETION | 1.643912  | 0.638608  |
| YPL244C | HUT1    | DELETION | -0.222112 | -0.020695 |
| YPL244C | HUT1    | DELETION | -0.222112 | -0.020695 |
| YPL248C | GAL4    | DELETION | 0.262092  | 1.173411  |
| YPL253C | VIK1    | DELETION | 0.552788  | -0.160785 |
| YPL254W | HFI1    | DELETION | NaN       | NaN       |
| YPL256C | CLN2    | DELETION | -0.811315 | 1.143029  |
| YPL269W | KAR9    | DELETION | 0.502338  | 0.894154  |
| YPR009W | SUT2    | DELETION | 0.366343  | -0.026855 |

|         |         |          |           |           |
|---------|---------|----------|-----------|-----------|
| YPR017C | DSS4    | DELETION | -0.277331 | -0.942437 |
| YPR018W | RLF2    | DELETION | -3.4195   | -0.076867 |
| YPR022C | YPR022C | DELETION | -0.329815 | -0.221898 |
| YPR023C | EAF3    | DELETION | 2.430474  | 0.871984  |
| YPR024W | YME1    | DELETION | 2.603511  | -0.987978 |
| YPR030W | CSR2    | DELETION | -0.175583 | 0.849061  |
| YPR031W | NTO1    | DELETION | 0.098753  | -1.016887 |
| YPR032W | SRO7    | DELETION | -0.413011 | -4.634259 |
| YPR034W | ARP7    | DAmP     | NaN       | NaN       |
| YPR043W | RPL43A  | DELETION | -4.489801 | 2.677059  |
| YPR045C | MNI2    | DELETION | -6.31256  | 2.560165  |
| YPR046W | MCM16   | DELETION | 0.710449  | -0.18826  |
| YPR051W | MAK3    | DELETION | -3.485016 | -0.356538 |
| YPR052C | NHP6A   | DELETION | -1.344229 | -0.330854 |
| YPR054W | SMK1    | DELETION | 0.49414   | 0.14553   |
| YPR056W | TFB4    | DAmP     | NaN       | NaN       |
| YPR057W | BRR1    | DELETION | 0.693635  | 1.831421  |
| YPR063C | YPR063C | DELETION | -1.008408 | -0.612553 |
| YPR065W | ROX1    | DELETION | -0.172441 | -1.585276 |
| YPR066W | UBA3    | DELETION | 1.902823  | 0.851152  |
| YPR068C | HOS1    | DELETION | -0.111097 | -0.498567 |
| YPR069C | SPE3    | DELETION | -0.68366  | -0.125473 |
| YPR070W | MED1    | DELETION | -0.718475 | 4.796885  |
| YPR072W | NOT5    | DELETION | 0.917293  | -0.300523 |
| YPR075C | OPY2    | DELETION | 0.406354  | -0.438991 |
| YPR084W | YPR084W | DELETION | -4.543114 | 2.338415  |
| YPR086W | SUA7    | DAmP     | NaN       | NaN       |
| YPR093C | ASR1    | DELETION | -0.158043 | 0.638162  |
| YPR106W | ISR1    | DELETION | 0.663264  | 1.750769  |
| YPR119W | CLB2    | DELETION | -1.276967 | 0.434406  |
| YPR120C | CLB5    | DELETION | -2.095114 | -1.090817 |
| YPR129W | SCD6    | DELETION | -0.051238 | -0.351466 |
| YPR134W | MSS18   | DELETION | -0.588134 | 0.104571  |
| YPR135W | CTF4    | DELETION | -4.704362 | -2.607789 |
| YPR140W | TAZ1    | DELETION | 0.52276   | 0.807175  |
| YPR141C | KAR3    | DELETION | 0.474419  | -0.641333 |
| YPR152C | URN1    | DELETION | 1.168623  | 0.939408  |
| YPR164W | MMS1    | DELETION | -1.761746 | -4.432447 |
| YPR167C | MET16   | DELETION | -5.848694 | 0.118538  |
| YPR168W | NUT2    | DAmP     | NaN       | NaN       |
| YPR173C | VPS4    | DELETION | 0.408887  | -0.35725  |
| YPR174C | YPR174C | DELETION | -0.992869 | 0.570888  |
| YPR175W | DPB2    | DAmP     | NaN       | NaN       |
| YPR189W | SKI3    | DELETION | -0.936914 | 1.075287  |

## Supplementary Table 2.

**Set5 genetic interactions.** List of genes that have significant genetic interactions ( $S > 2.0$  or  $S < -2.5$ ) with *SET5*. Manually-curated categories were described in ref. 5.

| ORF       | Gene Name | Category                             |
|-----------|-----------|--------------------------------------|
| YAL001C   | TOP1      | DNA replication                      |
| YAL002W   | TLG2      | OTHER                                |
| YAL003W   | TGS1      | Splicing and mRNA processing         |
| YAL004W   | SWI4      | Transcription RNA pol II             |
| YAL005C   | SUR1      | Metabolism                           |
| YAL007C   | STE50     | signal transduction                  |
| YAL008W   | SSN8      | Transcription RNA pol II             |
| YAL009W   | SRS2      | DNA Recombination or Repair          |
| YAL010C   | SRO7      | OTHER                                |
| YAL011W   | SRB8      | Transcription RNA pol II             |
| YAL012W   | SRB5      | Transcription RNA pol II             |
| YAL013W   | SPT3      | Transcription RNA pol II             |
| YAL014C   | SLX8      | DNA Recombination or Repair          |
| YAL015C   | SLT2      | signal transduction                  |
| YAL016C-A | SKT5      | Morphogenesis and Wall Integrity     |
| YAL016C-B | SIR1      | Chromatin Modification or Remodeling |
| YAL016W   | SLA1      | Morphogenesis and Wall Integrity     |
| YAL017W   | RTT107    | DNA Recombination or Repair          |
| YAL018C   | RTT101    | DNA Recombination or Repair          |
| YAL019W   | RSC4      | Chromatin Modification or Remodeling |
| YAL019W-A | RSC2      | Chromatin Modification or Remodeling |
| YAL020C   | RSC1      | Chromatin Modification or Remodeling |
| YAL021C   | RPS6B     | Ribosome                             |
| YAL022C   | RPP2B     | Ribosome                             |
| YAL023C   | RPL8A     | Ribosome                             |
| YAL024C   | RPL20B    | Ribosome                             |
| YAL025C   | RPB8      | Transcription RNA pol II             |
| YAL026C   | ROT2      | Morphogenesis and Wall Integrity     |
| YAL026C-A | RER1      | OTHER                                |
| YAL027W   | RAD54     | DNA Recombination or Repair          |
| YAL028W   | RAD5      | DNA Recombination or Repair          |
| YAL029C   | PTP2      | signal transduction                  |
| YAL030W   | PTC1      | signal transduction                  |
| YAL031C   | PRE9      | proteasome or ubiquitin cycle        |
| YAL031W-A | PMR1      | signal transduction                  |
| YAL032C   | PDE2      | signal transduction                  |
| YAL033W   | OST3      | Metabolism                           |
| YAL034C   | NUP133    | protein folding or transport         |
| YAL034C-B | NEM1      | Morphogenesis and Wall Integrity     |
| YAL035W   | NCS6      | Morphogenesis and Wall Integrity     |

|           |       |                                      |
|-----------|-------|--------------------------------------|
| YAL036C   | MUS81 | DNA Recombination or Repair          |
| YAL037C-A | MON1  | protein folding or transport         |
| YAL037C-B | MNN10 | Metabolism                           |
| YAL037W   | MTC5  | OTHER                                |
| YAL038W   | MMS1  | DNA Recombination or Repair          |
| YAL040C   | MID1  | signal transduction                  |
| YAL041W   | MGA2  | Transcription RNA pol II             |
| YAL042C-A | MED1  | Transcription RNA pol II             |
| YAL042W   | MET18 | Transcription RNA pol II             |
| YAL043C   | LSM6  | OTHER                                |
| YAL044C   | KIP3  | chromosome segregation               |
| YAL044W-A | ISY1  | OTHER                                |
| YAL045C   | IRE1  | signal transduction                  |
| YAL046C   | IRA2  | signal transduction                  |
| YAL047C   | INP52 | OTHER                                |
| YAL047W-A | ILM1  | Mitochondria                         |
| YAL048C   | IKI1  | Transcription RNA pol II             |
| YAL049C   | IES2  | Chromatin Modification or Remodeling |
| YAL051W   | HUR1  | DNA replication                      |
| YAL053W   | HHF1  | Chromatin Modification or Remodeling |
| YAL054C   | HAP5  | Transcription RNA pol II             |
| YAL055W   | HAP2  | Transcription RNA pol II             |
| YAL056C-A | FLC2  | Morphogenesis and Wall Integrity     |
| YAL056W   | GOS1  | OTHER                                |
| YAL058W   | ERG5  | Metabolism                           |
| YAL059C-A | DST1  | Transcription RNA pol II             |
| YAL059W   | ERG3  | Metabolism                           |
| YAL060W   | DRS2  | OTHER                                |
| YAL061W   | CWH41 | Morphogenesis and Wall Integrity     |
| YAL062W   | CTK1  | Transcription RNA pol II             |
| YAL063C   | CPR7  | protein folding or transport         |
| YAL063C-A | CCH1  | signal transduction                  |
| YAL064C-A | BDF2  | Chromatin Modification or Remodeling |
| YAL064W   | BUD14 | Morphogenesis and Wall Integrity     |
| YAL064W-B | BDF1  | Transcription RNA pol II             |
| YAL065C   | BCK1  | signal transduction                  |
| YAL066W   | ATG8  | OTHER                                |
| YAL067C   | ASC1  | Ribosome                             |
| YAL067W-A | ARO80 | Transcription RNA pol II             |
| YAL068C   | ARF1  | OTHER                                |
| YAL068W-A | ADA2  | Transcription RNA pol II             |
| YAL069W   | ACK1  | Morphogenesis and Wall Integrity     |
| YAR002C-A | TSR2  | OTHER                                |
| YAR003W   | UBI4  | proteasome or ubiquitin cycle        |
| YAR007C   | UBP12 | proteasome or ubiquitin cycle        |
| YAR008W   | VAM10 | OTHER                                |
| YAR014C   | VAM3  | OTHER                                |

|           |             |                                       |
|-----------|-------------|---------------------------------------|
| YAR015W   | VAM6        | OTHER                                 |
| YAR018C   | VAM7        | OTHER                                 |
| YAR019C   | VPS21       | protein folding or transport          |
| YAR019W-A | VPS24       | protein folding or transport          |
| YAR020C   | VPS51       | protein folding or transport          |
| YAR023C   | VRP1        | cell cycle                            |
| YAR027W   | YPT7        | OTHER                                 |
| YAR028W   | YTA7        | Chromatin Modification or Remodeling  |
| YBR094W   | PBY1        | OTHER                                 |
| YCL037C   | SRO9        | OTHER                                 |
| YDR004W   | RAD57       | DNA Recombination or Repair           |
| YDR074W   | TPS2        | Metabolism                            |
| YDR076W   | RAD55       | DNA Recombination or Repair           |
| YDR080W   | VPS41       | Protein Folding or Transport          |
| YDR289C   | RTT103      | Transcription RNA pol II              |
| YDR293C   | SSD1        | Morphogenesis and Cell Wall Integrity |
| YDR308C   | SRB7 - DAmP | Transcription RNA pol II              |
| YDR369C   | XRS2        | Telomere Maintenance                  |
| YDR389W   | SAC7        | Signal Transduction                   |
| YEL033W   | MTC7        | Telomere Maintenance                  |
| YER016W   | BIM1        | Cell Cycle                            |
| YER151C   | UBP3        | Proteasome OR Ubiquitin Cycle         |
| YER162C   | RAD4        | DNA Recombination or Repair           |
| YFL013C   | IES1        | Chromatin Modification or Remodeling  |
| YFL018C   | LPD1        | Metabolism                            |
| YGL003C   | CDH1        | Cell Cycle                            |
| YGL045W   | RIM8        | Metabolism                            |
| YGL066W   | SGF73       | Transcription RNA pol II              |
| YGL219C   | MDM34       | Mitochondria                          |
| YGL237C   | HAP2        | Transcription RNA pol II              |
| YGR122W   | YGR122W     | OTHER                                 |
| YGR188C   | BUB1        | Cell Cycle                            |
| YHL027W   | RIM101      | Transcription RNA pol II              |
| YIL090W   | ICE2        | OTHER                                 |
| YIR023W   | DAL81       | Transcription RNA pol II              |
| YJL029C   | VPS53       | Protein Folding or Transport          |
| YJR011C   | YJR011C     | DNA Recombination or Repair           |
| YJR145C   | RPS4A       | Ribosome                              |
| YLL002W   | RTT109      | DNA Recombination or Repair           |
| YLL043W   | FPS1        | OTHER                                 |
| YLR182W   | SWI6        | Transcription RNA pol II              |
| YLR200W   | YKE2        | Protein Folding OR Transport          |
| YLR234W   | TOP3        | Telomere Maintenance                  |
| YLR242C   | ARV1        | Protein Folding or Transport          |
| YLR320W   | MMS22       | Telomere Maintenance                  |
| YLR342W   | FKS1        | Morphogenesis and Cell Wall Integrity |
| YLR384C   | IKI3        | Transcription                         |

|         |         |                                       |
|---------|---------|---------------------------------------|
| YLR386W | VAC14   | Protein Folding or Transport          |
| YML028W | TSA1    | Telomere Maintenance                  |
| YML032C | RAD52   | DNA Recombination or Repair           |
| YML103C | NUP188  | Protein Folding or Transport          |
| YML112W | CTK3    | Transcription RNA pol II              |
| YMR073C | IRC21   | Uncharacterized                       |
| YMR224C | MRE11   | Telomere Maintenance                  |
| YNL079C | TPM1    | Morphogenesis and Wall Integrity      |
| YNL197C | WHI3    | Cell Cycle                            |
| YNL246W | VPS75   | Chromatin Modification or Remodeling  |
| YNL294C | RIM21   | Morphogenesis and Cell Wall Integrity |
| YNR010W | CSE2    | Transcription RNA pol II              |
| YOL009C | MDM12   | Mitochondria                          |
| YOR026W | BUB3    | Cell Cycle                            |
| YPL069C | BTS1    | Metabolism                            |
| YPL079W | RPL21B  | Ribosome                              |
| YPL090C | RPS6A   | Ribosome                              |
| YPL144W | POC4    | Proteasome OR Ubiquitin Cycle         |
| YPL180W | TCO89   | Metabolism                            |
| YPR043W | RPL43A  | Ribosome                              |
| YPR045C | MNI2    | Transcription                         |
| YPR084W | YPR084W | Uncharacterized                       |
| YPR135W | CTF4    | Chromosome Segregation                |

## Supplementary Table 3.

**Set1 genetic interactions.** List of genes that have significant genetic interactions ( $S > 2.0$  or  $S < -2.5$ ) with *SET1*. Manually-curated categories were described in ref. 5.

| ORF       | Gene Name | Category                             |
|-----------|-----------|--------------------------------------|
| YAL001C   | OYE2      | Metabolism                           |
| YAL002W   | OPI3      | Metabolism                           |
| YAL003W   | NUM1      | OTHER                                |
| YAL004W   | NKP2      | chromosome segregation               |
| YAL005C   | NHP10     | Chromatin Modification or Remodeling |
| YAL007C   | MTC4      | Uncharacterized                      |
| YAL008W   | MSN5      | protein folding or transport         |
| YAL009W   | MMS2      | DNA Recombination or Repair          |
| YAL010C   | MMR1      | Mitochondria                         |
| YAL011W   | MKS1      | Metabolism                           |
| YAL012W   | MET16     | Metabolism                           |
| YAL013W   | MEH1      | OTHER                                |
| YAL014C   | MDM35     | Mitochondria                         |
| YAL015C   | MAK3      | OTHER                                |
| YAL016C-A | LSM7      | OTHER                                |
| YAL016C-B | LOS1      | OTHER                                |
| YAL016W   | LST4      | OTHER                                |
| YAL017W   | LIA1      | OTHER                                |
| YAL018C   | LGE1      | Chromatin Modification or Remodeling |
| YAL019W   | LDB19     | OTHER                                |
| YAL019W-A | KIN3      | Uncharacterized                      |
| YAL020C   | JNM1      | chromosome segregation               |
| YAL021C   | IWR1      | Transcription RNA pol II             |
| YAL022C   | IST3      | OTHER                                |
| YAL023C   | IRC25     | protein folding or transport         |
| YAL024C   | IPK1      | Metabolism                           |
| YAL025C   | IKI1      | Transcription RNA pol II             |
| YAL026C   | HTZ1      | Chromatin Modification or Remodeling |
| YAL026C-A | HST1      | Chromatin Modification or Remodeling |
| YAL027W   | HPC2      | Transcription RNA pol II             |
| YAL028W   | HIR3      | Transcription RNA pol II             |
| YAL029C   | HDA1      | Chromatin Modification or Remodeling |
| YAL030W   | HCR1      | OTHER                                |
| YAL031C   | HAP2      | Transcription RNA pol II             |
| YAL031W-A | GSF2      | OTHER                                |
| YAL032C   | GPA2      | signal transduction                  |
| YAL033W   | GIM5      | protein folding or transport         |
| YAL034C   | GIM3      | protein folding or transport         |
| YAL034C-B | GET1      | signal transduction                  |
| YAL034W-A | GET3      | OTHER                                |

|           |       |                                      |
|-----------|-------|--------------------------------------|
| YAL035W   | GEM1  | Mitochondria                         |
| YAL036C   | GDS1  | Uncharacterized                      |
| YAL037C-A | GAS1  | Morphogenesis and Wall Integrity     |
| YAL037W   | GCR2  | Transcription RNA pol II             |
| YAL038W   | EMI1  | Transcription RNA pol II             |
| YAL039C   | ELP6  | Transcription RNA pol II             |
| YAL040C   | ELP4  | Transcription RNA pol II             |
| YAL041W   | ELP3  | Transcription RNA pol II             |
| YAL042C-A | EDE1  | OTHER                                |
| YAL042W   | ELP2  | Transcription RNA pol II             |
| YAL043C   | EAP1  | OTHER                                |
| YAL044C   | EAF3  | Chromatin Modification or Remodeling |
| YAL044W-A | DOC1  | proteasome or ubiquitin cycle        |
| YAL045C   | DOA1  | proteasome or ubiquitin cycle        |
| YAL046C   | DEP1  | Chromatin Modification or Remodeling |
| YAL047C   | DEG1  | OTHER                                |
| YAL047W-A | DCC1  | chromosome segregation               |
| YAL048C   | CSM1  | chromosome segregation               |
| YAL049C   | CSG2  | OTHER                                |
| YAL051W   | CLA4  | reg prog cell cyc                    |
| YAL053W   | CKB1  | Transcription RNA pol II             |
| YAL054C   | CIK1  | chromosome segregation               |
| YAL055W   | CEM1  | Mitochondria                         |
| YAL056C-A | CDC28 | cell cycle                           |
| YAL056W   | CDC73 | Chromatin Modification or Remodeling |
| YAL058W   | CDC26 | proteasome or ubiquitin cycle        |
| YAL059C-A | CBP4  | Mitochondria                         |
| YAL059W   | CCW12 | Morphogenesis and Wall Integrity     |
| YAL060W   | BUL1  | proteasome or ubiquitin cycle        |
| YAL061W   | BUD31 | OTHER                                |
| YAL062W   | BUD27 | OTHER                                |
| YAL063C   | BRE2  | Chromatin Modification or Remodeling |
| YAL063C-A | BRE1  | Chromatin Modification or Remodeling |
| YAL064C-A | BAS1  | Transcription RNA pol II             |
| YAL064W   | BEM1  | Morphogenesis and Wall Integrity     |
| YAL064W-B | ASE1  | chromosome segregation               |
| YAL065C   | ARX1  | Ribosome                             |
| YAL066W   | ARP4  | Chromatin Modification or Remodeling |
| YAL067C   | ARO1  | Metabolism                           |
| YAL067W-A | ARC1  | OTHER                                |
| YAL068C   | APC2  | chromosome segregation               |
| YAL068W-A | ALT1  | Metabolism                           |
| YAL069W   | AIM22 | Mitochondria                         |
| YAR002C-A | PAC10 | protein folding or transport         |
| YAR002W   | PAC1  | chromosome segregation               |
| YAR003W   | PBP1  | OTHER                                |
| YAR007C   | PEX22 | protein folding or transport         |



|           |       |                                      |
|-----------|-------|--------------------------------------|
| YAR008W   | PEX32 | Metabolism                           |
| YAR014C   | PFS1  | Morphogenesis and Wall Integrity     |
| YAR015W   | PHO23 | Chromatin Modification or Remodeling |
| YAR018C   | POM34 | cell cycle                           |
| YAR019C   | PPH3  | Chromatin Modification or Remodeling |
| YAR019W-A | PPM1  | OTHER                                |
| YAR020C   | PSY2  | Chromatin Modification or Remodeling |
| YAR023C   | RAD14 | DNA Recombination or Repair          |
| YAR027W   | RAD27 | DNA Recombination or Repair          |
| YAR028W   | RAD6  | Transcription RNA pol II             |
| YAR029W   | RCO1  | Chromatin Modification or Remodeling |
| YAR030C   | RIM13 | OTHER                                |
| YAR031W   | RIM20 | OTHER                                |
| YAR033W   | RLF2  | proteasome or ubiquitin cycle        |
| YAR035C-A | RPL8B | Ribosome                             |
| YAR035W   | RPB9  | Transcription RNA pol II             |
| YAR042W   | RPN10 | proteasome or ubiquitin cycle        |
| YAR047C   | RPN4  | proteasome or ubiquitin cycle        |
| YAR050W   | RPS8A | Ribosome                             |
| YAR053W   | RRD1  | Transcription RNA pol II             |
| YAR060C   | RSC3  | Chromatin Modification or Remodeling |
| YAR064W   | RTF1  | Chromatin Modification or Remodeling |
| YAR066W   | RTG1  | signal transduction                  |
| YAR068W   | RTG2  | signal transduction                  |
| YAR069C   | RTG3  | signal transduction                  |
| YAR070C   | RTR1  | Transcription RNA pol II             |
| YAR071W   | RXT2  | Chromatin Modification or Remodeling |
| YAR073W   | SAP30 | Chromatin Modification or Remodeling |
| YAR075W   | SDC1  | Chromatin Modification or Remodeling |
| YBL072C   | YME1  | Mitochondria                         |
| YBL073W   | VPS9  | OTHER                                |
| YBL074C   | VPS8  | OTHER                                |
| YBL075C   | VPS72 | Chromatin Modification or Remodeling |
| YBL076C   | VPS27 | OTHER                                |
| YBL077W   | VMA21 | OTHER                                |
| YBL078C   | VIP1  | Metabolism                           |
| YBL079W   | UME1  | Transcription RNA pol II             |
| YBL080C   | UBP15 | proteasome or ubiquitin cycle        |
| YBL081W   | UBP14 | proteasome or ubiquitin cycle        |
| YBL082C   | UBP13 | proteasome or ubiquitin cycle        |
| YBL083C   | TUB3  | chromosome segregation               |
| YBL085W   | TPS1  | Metabolism                           |
| YBL086C   | TIF2  | OTHER                                |
| YBL087C   | THR1  | Metabolism                           |
| YBL088C   | THI6  | Metabolism                           |
| YBL089W   | TAF13 | Transcription RNA pol II             |
| YBL090W   | SXM1  | protein folding or transport         |

|           |             |                                       |
|-----------|-------------|---------------------------------------|
| YBL091C   | SWR1        | Chromatin Modification or Remodeling  |
| YBL091C-A | SWD3        | Chromatin Modification or Remodeling  |
| YBL092W   | SWD1        | Chromatin Modification or Remodeling  |
| YBL093C   | SWC3        | Chromatin Modification or Remodeling  |
| YBL094C   | SWA2        | OTHER                                 |
| YBL095W   | SVP26       | OTHER                                 |
| YBL096C   | SUR4        | Metabolism                            |
| YBL097W   | SUM1        | Transcription RNA pol II              |
| YBL098W   | STM1        | Ribosome                              |
| YBL099W   | STE24       | OTHER                                 |
| YBL100C   | STB5        | reg prog cell cyc                     |
| YBL100W-C | SSN2        | Transcription RNA pol II              |
| YBL101C   | SRN2        | proteasome or ubiquitin cycle         |
| YBL102W   | SRB2        | Transcription RNA pol II              |
| YBL103C   | SPT21       | Transcription RNA pol II              |
| YBL105C   | SPF1        | OTHER                                 |
| YBL106C   | SNX4        | OTHER                                 |
| YBL107C   | SNC2        | OTHER                                 |
| YBL107W-A | SKY1        | protein folding or transport          |
| YBL108C-A | SIN3        | Chromatin Modification or Remodeling  |
| YBL108W   | SIW14       | OTHER                                 |
| YBL109W   | SIF2        | Chromatin Modification or Remodeling  |
| YBL111C   | SHP1        | proteasome or ubiquitin cycle         |
| YBL112C   | SGF29       | Transcription RNA pol II              |
| YBL113C   | SEC22       | protein folding or transport          |
| YBL113W-A | SEC28       | protein folding or transport          |
| YBR094W   | PBY1        | OTHER                                 |
| YCL037C   | SRO9        | OTHER                                 |
| YDR004W   | RAD57       | DNA Recombination or Repair           |
| YDR074W   | TPS2        | Metabolism                            |
| YDR076W   | RAD55       | DNA Recombination or Repair           |
| YDR080W   | VPS41       | Protein Folding or Transport          |
| YDR289C   | RTT103      | Transcription RNA pol II              |
| YDR293C   | SSD1        | Morphogenesis and Cell Wall Integrity |
| YDR308C   | SRB7 - DAmP | Transcription RNA pol II              |
| YDR369C   | XRS2        | Telomere Maintenance                  |
| YDR389W   | SAC7        | Signal Transduction                   |
| YEL033W   | MTC7        | Telomere Maintenance                  |
| YER016W   | BIM1        | Cell Cycle                            |
| YER151C   | UBP3        | Proteasome OR Ubiquitin Cycle         |
| YER162C   | RAD4        | DNA Recombination or Repair           |
| YFL013C   | IES1        | Chromatin Modification or Remodeling  |
| YFL018C   | LPD1        | Metabolism                            |
| YGL003C   | CDH1        | Cell Cycle                            |
| YGL045W   | RIM8        | Metabolism                            |
| YGL066W   | SGF73       | Transcription RNA pol II              |
| YGL219C   | MDM34       | Mitochondria                          |

|         |         |                                       |
|---------|---------|---------------------------------------|
| YGL237C | HAP2    | Transcription RNA pol II              |
| YGR122W | YGR122W | OTHER                                 |
| YGR188C | BUB1    | Cell Cycle                            |
| YHL027W | RIM101  | Transcription RNA pol II              |
| YIL090W | ICE2    | OTHER                                 |
| YIR023W | DAL81   | Transcription RNA pol II              |
| YJL029C | VPS53   | Protein Folding or Transport          |
| YJR011C | YJR011C | DNA Recombination or Repair           |
| YJR145C | RPS4A   | Ribosome                              |
| YLL002W | RTT109  | DNA Recombination or Repair           |
| YLL043W | FPS1    | OTHER                                 |
| YLR182W | SWI6    | Transcription RNA pol II              |
| YLR200W | YKE2    | Protein Folding OR Transport          |
| YLR234W | TOP3    | Telomere Maintenance                  |
| YLR242C | ARV1    | Protein Folding or Transport          |
| YLR320W | MMS22   | Telomere Maintenance                  |
| YLR342W | FKS1    | Morphogenesis and Cell Wall Integrity |
| YLR384C | IKI3    | Transcription                         |
| YLR386W | VAC14   | Protein Folding or Transport          |
| YML028W | TSA1    | Telomere Maintenance                  |
| YML032C | RAD52   | DNA Recombination or Repair           |
| YML103C | NUP188  | Protein Folding or Transport          |
| YML112W | CTK3    | Transcription RNA pol II              |
| YMR073C | IRC21   | Uncharacterized                       |
| YMR224C | MRE11   | Telomere Maintenance                  |
| YNL079C | TPM1    | Morphogenesis and Wall Integrity      |
| YNL197C | WHI3    | Cell Cycle                            |
| YNL246W | VPS75   | Chromatin Modification or Remodeling  |
| YNL294C | RIM21   | Morphogenesis and Cell Wall Integrity |
| YNR010W | CSE2    | Transcription RNA pol II              |
| YOL009C | MDM12   | Mitochondria                          |
| YOR026W | BUB3    | Cell Cycle                            |
| YPL069C | BTS1    | Metabolism                            |
| YPL079W | RPL21B  | Ribosome                              |
| YPL090C | RPS6A   | Ribosome                              |
| YPL144W | POC4    | Proteasome OR Ubiquitin Cycle         |
| YPL180W | TCO89   | Metabolism                            |
| YPR043W | RPL43A  | Ribosome                              |
| YPR045C | MNI2    | Transcription                         |
| YPR084W | YPR084W | Uncharacterized                       |
| YPR135W | CTF4    | Chromosome Segregation                |

## Supplementary Table 4.

**RNA-Seq data.** List of significantly differentially expressed genes in *set5Δ* mutant.

FPKM values calculated with FDR-adjusted p-value < 0.05 and fold-change relative to WT > 1.7 (see Materials and Methods for details) are indicated for each gene.

| ORF       | WT      | <i>set5Δ</i> | <i>SET5<sub>Y402A</sub></i> | <i>set1Δ</i> | <i>set5Δset1Δ</i> |
|-----------|---------|--------------|-----------------------------|--------------|-------------------|
| YBR005W   | 36.0993 | 110.608      | 149.404                     | 46.8462      | 52.1699           |
| YBR054W   | 44.3476 | 78.1997      | 119.384                     | 137.334      | 111.942           |
| YBR056C-B | 195.267 | 1061.37      | 1496.86                     | 182.937      | 160.216           |
| YBR085C-A | 249.554 | 443.763      | 465.572                     | 447.6        | 482.96            |
| YCR021C   | 17.881  | 93.5086      | 179.628                     | 11.1627      | 11.3979           |
| YDL048C   | 34.0942 | 82.4487      | 95.609                      | 38.6493      | 43.2097           |
| YDR171W   | 28.9979 | 153.285      | 253.704                     | 26.7428      | 29.0107           |
| YDR247W   | 18.4482 | 32.3665      | 41.5916                     | 12.6091      | 13.636            |
| YER053C   | 28.8603 | 87.8684      | 114.971                     | 27.3777      | 26.6993           |
| YER130C   | 57.5173 | 120.317      | 142.69                      | 44.6372      | 47.1437           |
| YER150W   | 38.3362 | 90.389       | 135.405                     | 38.9603      | 42.0256           |
| YGL037C   | 243.468 | 484.374      | 577.974                     | 246.636      | 236.43            |
| YGL263W   | 1.85623 | 7.06358      | 2.49492                     | 7.52776      | 24.708            |
| YGR138C   | 22.6952 | 69.452       | 122.359                     | 34.7411      | 34.3878           |
| YGR142W   | 29.3053 | 98.3753      | 169.483                     | 19.0079      | 17.1554           |
| YGR161C   | 33.8117 | 74.3929      | 94.5592                     | 33.4427      | 44.2178           |
| YGR249W   | 2.86228 | 6.25995      | 12.066                      | 4.2986       | 5.19529           |
| YGR254W   | 660.031 | 1196.52      | 1456.87                     | 512.07       | 460.417           |
| YHL021C   | 20.4504 | 39.0559      | 58.5166                     | 21.3523      | 20.7149           |
| YHR087W   | 31.9916 | 70.0051      | 82.5134                     | 54.4601      | 50.7461           |
| YHR138C   | 93.5963 | 173.562      | 185.93                      | 148.603      | 151.772           |
| YJL052W   | 183.922 | 398.263      | 533.8                       | 202.678      | 181.694           |
| YJL144W   | 36.7865 | 98.9025      | 118.753                     | 17.2363      | 17.7915           |
| YKL109W   | 47.4642 | 89.8738      | 107.698                     | 27.3481      | 27.4932           |
| YLR120C   | 49.3398 | 92.1459      | 126.595                     | 49.3574      | 57.9744           |
| YLR194C   | 150.422 | 318.565      | 397.768                     | 137.736      | 157.145           |
| YLR297W   | 27.2148 | 78.7909      | 88.2777                     | 37.6606      | 42.0562           |
| YLR414C   | 82.1494 | 153.251      | 183.697                     | 78.7502      | 73.3864           |
| YMR316C-A | 30.7706 | 107.061      | 154.884                     | 20.2561      | 20.8771           |
| YMR316W   | 17.4926 | 80.7439      | 118.3                       | 12.7195      | 12.8784           |
| YNR014W   | 17.4693 | 33.2588      | 49.0074                     | 23.9065      | 28.177            |
| YOL014W   | 79.9811 | 252.229      | 303.09                      | 47.1364      | 39.7611           |
| YOL016C   | 35.7422 | 180.715      | 291.857                     | 31.1056      | 32.6574           |
| YOR052C   | 180.29  | 329.351      | 343.661                     | 211.054      | 214.574           |
| YOR220W   | 48.1974 | 109.532      | 142.903                     | 48.3193      | 47.5237           |
| YOR273C   | 11.5709 | 20.3741      | 44.1603                     | 15.0991      | 14.1102           |
| YPL014W   | 20.9205 | 62.5249      | 107.644                     | 20.8985      | 21.1571           |
| YPR156C   | 65.821  | 117.751      | 149.525                     | 77.4197      | 78.208            |

|         |         |           |         |         |           |
|---------|---------|-----------|---------|---------|-----------|
| YPR157W | 6.47344 | 19.8237   | 25.3895 | 9.73122 | 11.2071   |
| YPR158W | 37.4082 | 68.877    | 81.111  | 35.9615 | 35.2346   |
| YDL042C | 31.3593 | 16.1674   | 23.6764 | 22.4007 | 18.9086   |
| YHR207C | 34.5605 | 0.0544822 | 42.426  | 37.8453 | 0.0167172 |

## Supplementary Table 5.

**RNA-Seq data.** List of significantly differentially expressed genes in *set1Δ* mutant.

FPKM values calculated with FDR-adjusted p-value < 0.05 and fold-change relative to WT > 1.7 (see Materials and Methods for details) are indicated for each gene.

| ORF       | WT        | <i>set5Δ</i> | <i>SET5<sub>Y402A</sub></i> | <i>set1Δ</i> | <i>set5Δset1Δ</i> |
|-----------|-----------|--------------|-----------------------------|--------------|-------------------|
| YAL018C   | 0.0989603 | 0.24413      | 0.21155                     | 4.36186      | 3.66659           |
| YAL040C   | 32.5494   | 40.7001      | 47.5245                     | 63.5912      | 80.0391           |
| YAL067C   | 1.62132   | 0.708136     | 1.71988                     | 4.77548      | 5.1927            |
| YBL043W   | 7.23649   | 10.6077      | 8.38588                     | 16.4046      | 15.4732           |
| YBL098W   | 22.0038   | 19.3684      | 21.7079                     | 41.1082      | 36.8815           |
| YBR040W   | 1.6225    | 1.48259      | 1.46872                     | 5.18527      | 5.31411           |
| YBR045C   | 2.99914   | 2.71003      | 3.12905                     | 6.7683       | 7.13104           |
| YBR047W   | 21.3166   | 26.2106      | 25.4722                     | 48.9828      | 47.8333           |
| YBR054W   | 44.3476   | 78.1997      | 119.384                     | 137.334      | 111.942           |
| YBR085C-A | 249.554   | 443.763      | 465.572                     | 447.6        | 482.96            |
| YBR093C   | 130.053   | 114.46       | 114.299                     | 241.789      | 155.533           |
| YBR105C   | 49.3838   | 64.174       | 57.2734                     | 84.7269      | 114.254           |
| YBR139W   | 35.6033   | 41.3843      | 50.2212                     | 61.9783      | 61.0965           |
| YBR200W-A | 0         | 0            | 5.20344                     | 94.902       | 98.6069           |
| YBR208C   | 9.45171   | 11.2855      | 11.7614                     | 16.8478      | 16.6602           |
| YBR226C   | 9.14916   | 10.8842      | 11.4213                     | 21.0115      | 17.2822           |
| YBR285W   | 5.24807   | 5.28344      | 7.13844                     | 11.9559      | 13.2688           |
| YBR296C   | 10.9046   | 11.897       | 11.3972                     | 24.5847      | 27.9867           |
| YCL007C   | 8.77824   | 17.3507      | 17.9056                     | 19.9453      | 22.1662           |
| YDL199C   | 4.16978   | 4.98112      | 6.22796                     | 8.16005      | 7.99161           |
| YDL209C   | 19.2606   | 20.225       | 17.964                      | 35.0865      | 35.4292           |
| YDL211C   | 10.6814   | 11.1927      | 12.8084                     | 20.328       | 21.7369           |
| YDL244W   | 1.78802   | 1.92674      | 2.13026                     | 3.9146       | 4.72105           |
| YDL245C   | 4.75461   | 4.58043      | 4.50911                     | 9.23865      | 9.08407           |
| YDR018C   | 3.10313   | 4.03393      | 3.67111                     | 6.34389      | 7.07058           |
| YDR031W   | 29.803    | 33.808       | 35.9696                     | 53.1639      | 42.0671           |
| YDR119W-A | 8.74332   | 19.9399      | 16.0422                     | 65.5564      | 46.5153           |
| YDR191W   | 9.42849   | 7.99911      | 8.87936                     | 18.375       | 18.7481           |
| YDR218C   | 0.856855  | 1.01749      | 0.714749                    | 3.25919      | 4.06426           |
| YDR230W   | 14.0763   | 18.1851      | 22.2932                     | 30.2931      | 32.685            |
| YDR231C   | 37.7273   | 46.7323      | 42.4358                     | 67.7876      | 65.5079           |
| YDR281C   | 69.1224   | 69.015       | 49.8801                     | 126.105      | 86.7942           |
| YDR402C   | 2.27634   | 2.53012      | 2.29242                     | 4.93776      | 4.90666           |
| YDR403W   | 2.88797   | 2.86585      | 3.56296                     | 8.76687      | 10.0129           |
| YDR461C-A | 107.072   | 112.729      | 104.727                     | 203.048      | 178.813           |
| YDR491C   | 33.5056   | 34.1142      | 28.905                      | 65.5225      | 62.4213           |
| YDR523C   | 2.50579   | 2.07459      | 2.01369                     | 5.20145      | 5.31918           |
| YDR528W   | 21.7206   | 18.1265      | 19.1207                     | 46.0636      | 44.4086           |

|           |           |          |           |         |         |
|-----------|-----------|----------|-----------|---------|---------|
| YEL039C   | 8.51484   | 5.60808  | 9.74282   | 19.704  | 19.3413 |
| YEL059C-A | 65.2756   | 76.5132  | 87.9942   | 209.971 | 190.279 |
| YEL070W   | 1.14924   | 1.85512  | 1.29543   | 4.89042 | 5.35383 |
| YER058W   | 54.807    | 73.7526  | 63.5716   | 107.2   | 84.5039 |
| YER084W   | 2.51291   | 1.74259  | 3.61692   | 11.5775 | 11.1411 |
| YER096W   | 3.08994   | 2.71897  | 3.23377   | 8.03561 | 9.05107 |
| YER106W   | 1.20497   | 0.645073 | 1.19335   | 3.8146  | 3.92461 |
| YFL011W   | 0.754899  | 0.578687 | 0.749684  | 3.13547 | 3.29548 |
| YFL012W   | 2.58046   | 1.75166  | 2.19035   | 10.1311 | 9.9746  |
| YFL014W   | 46.9638   | 70.6051  | 73.0639   | 91.8058 | 127.369 |
| YFL058W   | 0.703261  | 0.679616 | 0.66298   | 2.48214 | 3.74747 |
| YFR023W   | 0.371344  | 0.339371 | 0.33009   | 4.1315  | 3.53309 |
| YGL010W   | 30.3625   | 31.2614  | 30.7676   | 53.4962 | 49.6913 |
| YGL121C   | 17.4201   | 17.8263  | 22.1511   | 31.8153 | 31.1316 |
| YGL138C   | 0.0458749 | 0.199476 | 0.0469354 | 2.46052 | 1.59893 |
| YGL158W   | 1.81103   | 1.35374  | 1.43246   | 4.04129 | 3.86509 |
| YGL175C   | 5.44795   | 7.26731  | 8.06786   | 10.6928 | 11.9245 |
| YGL184C   | 1.98302   | 2.03814  | 1.78824   | 4.99338 | 5.411   |
| YGL209W   | 58.3768   | 62.6767  | 53.3504   | 152.203 | 179.189 |
| YGL263W   | 1.85623   | 7.06358  | 2.49492   | 7.52776 | 24.708  |
| YGR023W   | 6.61009   | 10.4791  | 13.2167   | 14.5101 | 15.4255 |
| YGR035C   | 117.11    | 79.5549  | 67.7712   | 227.298 | 240.171 |
| YGR043C   | 5.30165   | 5.7293   | 6.38184   | 10.0744 | 11.0587 |
| YGR052W   | 3.17189   | 6.58117  | 10.4271   | 8.54093 | 7.99948 |
| YGR053C   | 4.50564   | 6.66757  | 8.95717   | 9.34472 | 8.27565 |
| YGR059W   | 0.981812  | 0.881018 | 0.655095  | 3.01131 | 3.20868 |
| YGR079W   | 64.0307   | 40.2903  | 35.4731   | 145.313 | 173.453 |
| YGR087C   | 1.03812   | 0.973788 | 0.787617  | 5.08569 | 5.8263  |
| YGR144W   | 5.40007   | 5.63136  | 6.31839   | 12.8073 | 12.4957 |
| YGR146C   | 87.5289   | 106.812  | 106.174   | 158.699 | 210.835 |
| YGR225W   | 0.737461  | 0.682236 | 0.845069  | 2.17371 | 2.16725 |
| YGR256W   | 3.38467   | 4.14781  | 3.40668   | 6.87654 | 5.47854 |
| YGR260W   | 213.697   | 214.148  | 218.115   | 391.387 | 468.021 |
| YHL029C   | 32.0009   | 33.896   | 36.1076   | 56.8251 | 59.4804 |
| YHL036W   | 2.00986   | 3.82624  | 6.71758   | 13.314  | 15.3618 |
| YHL044W   | 13.2287   | 16.3786  | 16.0588   | 24.2689 | 23.2462 |
| YHR001W-A | 202.421   | 240.555  | 255.99    | 351.688 | 278.736 |
| YHR015W   | 2.67077   | 2.4201   | 2.81366   | 6.9597  | 6.06345 |
| YHR054C   | 23.4016   | 21.0784  | 25.1729   | 44.9702 | 43.8387 |
| YHR075C   | 8.69094   | 9.86791  | 10.3468   | 16.5984 | 13.1799 |
| YHR126C   | 0         | 0.273576 | 0.577326  | 4.46947 | 4.38922 |
| YHR140W   | 7.426     | 6.8485   | 7.4228    | 13.4636 | 12.5408 |
| YHR151C   | 19.9228   | 19.8546  | 18.3766   | 39.1053 | 40.5671 |
| YHR171W   | 8.17131   | 7.90125  | 9.14438   | 14.791  | 15.9591 |
| YIL006W   | 5.61207   | 9.12768  | 10.2958   | 18.3376 | 19.6992 |
| YIL011W   | 37.3382   | 37.9168  | 38.3751   | 72.1217 | 79.7029 |
| YIL042C   | 12.1848   | 16.966   | 18.3448   | 27.0388 | 32.2771 |

|           |          |          |           |         |         |
|-----------|----------|----------|-----------|---------|---------|
| YIL066C   | 3.90209  | 4.13731  | 4.4431    | 7.98639 | 9.30262 |
| YIL099W   | 2.41591  | 2.45145  | 2.24507   | 5.77471 | 9.38728 |
| YIR014W   | 7.05463  | 9.11004  | 9.2156    | 14.5654 | 15.6917 |
| YIR017W-A | 3.33234  | 4.08716  | 4.05675   | 9.78813 | 9.79062 |
| YIR027C   | 2.83553  | 2.0774   | 3.34633   | 7.26534 | 7.88925 |
| YIR039C   | 3.51415  | 3.70734  | 6.27387   | 9.44376 | 11.2988 |
| YIR042C   | 7.02464  | 11.1111  | 16.4351   | 13.6302 | 15.4937 |
| YJL037W   | 1.60259  | 1.64912  | 1.845     | 7.26388 | 8.56514 |
| YJL038C   | 9.05712  | 7.7669   | 8.87208   | 27.6379 | 29.0873 |
| YJL045W   | 2.1692   | 2.17328  | 2.02678   | 5.46944 | 5.75208 |
| YJL088W   | 5.98601  | 5.08754  | 3.8434    | 12.0564 | 12.9291 |
| YJL163C   | 7.43297  | 8.29816  | 9.23969   | 14.588  | 15.0631 |
| YJL181W   | 8.8101   | 7.8669   | 8.18578   | 15.7948 | 15.0216 |
| YJL194W   | 9.65256  | 8.61752  | 8.55512   | 26.4025 | 27.6353 |
| YJL219W   | 2.55743  | 3.10063  | 2.38238   | 5.4313  | 6.24199 |
| YJL221C   | 2.35312  | 2.6833   | 2.85373   | 5.25766 | 5.00277 |
| YJR078W   | 3.05035  | 2.44567  | 2.37824   | 14.7145 | 14.9836 |
| YJR159W   | 6.09307  | 5.8289   | 6.62107   | 11.3411 | 10.5746 |
| YKL162C   | 6.41942  | 6.53954  | 6.95494   | 12.5248 | 12.0283 |
| YKR034W   | 0.349479 | 0.690523 | 0.58562   | 3.41094 | 3.22852 |
| YKR039W   | 11.9769  | 11.8627  | 12.9452   | 26.8859 | 23.3448 |
| YKR102W   | 4.02058  | 4.24601  | 4.82362   | 7.70354 | 8.83959 |
| YLL046C   | 0.733465 | 0.684601 | 1.29863   | 3.04922 | 3.07317 |
| YLR013W   | 0        | 0.166102 | 0         | 1.45465 | 2.06326 |
| YLR108C   | 21.5127  | 20.4678  | 19.9764   | 45.5951 | 50.6643 |
| YLR218C   | 34.9172  | 57.5021  | 55.298    | 61.764  | 52.8613 |
| YLR307C-A | 0        | 1.22156  | 2.07527   | 16.5622 | 21.9909 |
| YLR307W   | 1.29255  | 1.09213  | 1.13144   | 13.7947 | 13.8625 |
| YLR312C   | 1.76155  | 1.26337  | 1.65167   | 4.52624 | 3.93251 |
| YLR346C   | 25.6379  | 34.4823  | 39.9503   | 49.3604 | 47.8132 |
| YLR356W   | 42.8543  | 45.8643  | 43.5308   | 73.7038 | 81.9767 |
| YML043C   | 31.4433  | 25.6724  | 22.3086   | 60.2597 | 63.8319 |
| YML058W-A | 250.104  | 279.032  | 375.287   | 1573.39 | 2554.22 |
| YMR034C   | 7.87566  | 9.58207  | 11.8907   | 17.0057 | 17.9055 |
| YMR085W   | 2.97704  | 3.09258  | 3.69159   | 5.95951 | 5.84854 |
| YMR101C   | 1.20988  | 1.24935  | 1.26306   | 4.50825 | 4.36997 |
| YMR120C   | 54.0657  | 43.806   | 37.0736   | 101.127 | 93.8788 |
| YMR122C   | 11.5226  | 11.7056  | 13.8128   | 22.4698 | 25.8851 |
| YMR244W   | 1.87204  | 1.07161  | 1.44537   | 7.98412 | 7.96361 |
| YMR323W   | 0.189814 | 0.150608 | 0.0779624 | 1.1745  | 2.83346 |
| YNL018C   | 1.97809  | 1.35914  | 1.30145   | 5.07357 | 5.32193 |
| YNL065W   | 77.2841  | 76.5062  | 66.7039   | 158.028 | 204.728 |
| YNL277W-A | 0        | 0        | 2.42782   | 22.1702 | 13.5417 |
| YNL332W   | 1.65134  | 1.84542  | 1.33056   | 4.26839 | 5.3193  |
| YNR064C   | 11.0307  | 11.5816  | 9.66717   | 27.5251 | 36.0053 |
| YNR071C   | 3.91144  | 3.85212  | 3.18879   | 7.43017 | 7.93845 |
| YNR073C   | 3.01979  | 3.60464  | 3.71286   | 6.71154 | 7.33169 |



|           |          |          |          |           |           |
|-----------|----------|----------|----------|-----------|-----------|
| YOL024W   | 1.78201  | 1.85895  | 1.58312  | 6.81176   | 5.91012   |
| YOL047C   | 3.06813  | 3.87115  | 4.09888  | 7.70734   | 8.96954   |
| YOL084W   | 0.933572 | 1.01906  | 1.36993  | 2.42404   | 2.52648   |
| YOL126C   | 78.0088  | 98.4738  | 95.7408  | 179.332   | 202.711   |
| YOL132W   | 2.41606  | 2.396    | 2.54071  | 6.259     | 6.93241   |
| YOL162W   | 2.52149  | 3.0534   | 2.9892   | 6.76708   | 7.2288    |
| YOR020W-A | 169.728  | 199.437  | 219.786  | 308.044   | 291.881   |
| YOR062C   | 8.53486  | 14.2408  | 16.2923  | 16.1286   | 18.1808   |
| YOR338W   | 13.9784  | 16.4486  | 14.7744  | 37.0195   | 56.2758   |
| YOR388C   | 2.45225  | 2.32298  | 2.31352  | 5.54017   | 5.886     |
| YOR391C   | 0.444721 | 0.263393 | 0.432521 | 2.97084   | 2.96174   |
| YOR393W   | 0.585543 | 0.357541 | 0.461932 | 1.96796   | 2.69752   |
| YPL054W   | 6.08123  | 7.03021  | 5.97119  | 12.0055   | 10.8317   |
| YPL171C   | 3.54777  | 4.05858  | 4.10919  | 8.46389   | 9.60676   |
| YPL187W   | 1.18503  | 2.86225  | 2.21805  | 6.70915   | 8.83258   |
| YPL280W   | 0.338531 | 0.26485  | 0.446161 | 2.63477   | 2.19347   |
| YPL281C   | 0.585543 | 0.357541 | 0.461932 | 1.96796   | 2.69752   |
| YPR015C   | 4.00272  | 6.7352   | 7.41415  | 9.90971   | 11.4583   |
| YPR061C   | 8.89411  | 10.2381  | 11.5206  | 17.8288   | 20.7578   |
| YPR151C   | 2.71037  | 4.0494   | 4.19363  | 6.86095   | 6.56916   |
| SRG1      | 175.278  | 146.472  | 149.068  | 100.407   | 85.2592   |
| YBL002W   | 2768.61  | 2839.12  | 2942.47  | 1224.34   | 1108.86   |
| YBL003C   | 1997.51  | 2193.77  | 2134.34  | 1055.68   | 890.568   |
| YDR222W   | 29.052   | 47.751   | 57.8716  | 16.5634   | 18.0501   |
| YDR384C   | 261.391  | 238.238  | 236.761  | 124.758   | 165.052   |
| YDR414C   | 63.0187  | 58.096   | 57.9452  | 34.4446   | 35.5048   |
| YDR538W   | 65.4854  | 63.1761  | 57.5127  | 34.3013   | 33.0862   |
| YGL143C   | 29.9477  | 32.6421  | 34.6653  | 16.8067   | 16.0581   |
| YGR018C   | 390.285  | 384.992  | 366.965  | 221.389   | 210.549   |
| YHR119W   | 24.3045  | 24.1867  | 24.4623  | 0.0328135 | 0.0323625 |
| YHR124W   | 13.4263  | 12.3256  | 12.0473  | 7.0374    | 8.17492   |
| YHR128W   | 349.515  | 325.462  | 338.052  | 201.711   | 179.068   |
| YIL121W   | 83.0233  | 87.3054  | 89.2951  | 45.8328   | 34.9588   |
| YJL144W   | 36.7865  | 98.9025  | 118.753  | 17.2363   | 17.7915   |
| YKL109W   | 47.4642  | 89.8738  | 107.698  | 27.3481   | 27.4932   |
| YKL170W   | 23.3276  | 19.7253  | 13.7364  | 12.5748   | 12.7442   |
| YKR061W   | 35.4889  | 32.2326  | 31.6529  | 18.868    | 22.2248   |
| YLR040C   | 45.0325  | 42.1747  | 41.9775  | 21.1968   | 20.0808   |
| YLR041W   | 47.6982  | 54.1411  | 60.587   | 22.3679   | 30.2297   |
| YLR064W   | 144.167  | 149.896  | 150.028  | 70.7358   | 78.7081   |
| YLR327C   | 139.669  | 201.96   | 217.803  | 68.4559   | 80.3015   |
| YLR446W   | 25.5962  | 20.715   | 21.8314  | 10.105    | 10.0738   |
| YMR011W   | 877.068  | 887.16   | 717.971  | 440.332   | 561.9     |
| YMR173W-A | 124.904  | 134.839  | 141.406  | 71.6704   | 63.4418   |
| YNL040W   | 37.6617  | 35.6749  | 35.6112  | 18.8131   | 18.2432   |
| YNL281W   | 498.567  | 522.837  | 518.913  | 278.659   | 259.093   |
| YOL104C   | 28.3572  | 30.5068  | 28.814   | 15.7735   | 17.4744   |

|         |         |         |         |         |         |
|---------|---------|---------|---------|---------|---------|
| YOR153W | 230.734 | 288.569 | 279.115 | 125.236 | 128.066 |
| YOR248W | 1292.3  | 1322.85 | 1366.68 | 746.163 | 770.531 |
| YOR381W | 18.8344 | 21.7099 | 21.803  | 9.97505 | 15.9689 |
| YOR383C | 1169.16 | 1410.98 | 1561.05 | 504.563 | 1619.64 |

## Supplementary Table 6.

**RNA-Seq data.** List of significantly differentially expressed genes in *set5Δ set1Δ* mutant. FPKM values calculated with FDR-adjusted p-value < 0.05 and fold-change relative to WT > 1.7 (see Materials and Methods for details) are indicated for each gene.

| ORF       | WT        | <i>set5Δ</i> | <i>SET5<sub>Y402A</sub></i> | <i>set1Δ</i> | <i>set5Δset1Δ</i> |
|-----------|-----------|--------------|-----------------------------|--------------|-------------------|
| YAL018C   | 0.0989603 | 0.24413      | 0.21155                     | 4.36186      | 3.66659           |
| YAL040C   | 32.5494   | 40.7001      | 47.5245                     | 63.5912      | 80.0391           |
| YAL067C   | 1.62132   | 0.708136     | 1.71988                     | 4.77548      | 5.1927            |
| YAR073W   | 0.932061  | 1.0282       | 1.66838                     | 1.74108      | 3.46939           |
| YAR075W   | 2.47062   | 2.86134      | 2.96299                     | 2.63653      | 7.33677           |
| YBL043W   | 7.23649   | 10.6077      | 8.38588                     | 16.4046      | 15.4732           |
| YBL084C   | 18.4722   | 22.0156      | 22.9866                     | 31.6428      | 32.1236           |
| YBL109W   | 0         | 2.41754      | 2.06022                     | 1.85586      | 5.65573           |
| YBL111C   | 4.62518   | 4.59929      | 5.41894                     | 5.61825      | 8.74382           |
| YBL113C   | 20.8208   | 25.5395      | 28.7412                     | 27.9208      | 37.1344           |
| YBR006W   | 19.1881   | 21.8041      | 24.0752                     | 33.1638      | 33.8709           |
| YBR018C   | 2.34296   | 2.38716      | 2.80194                     | 4.62154      | 5.31438           |
| YBR040W   | 1.6225    | 1.48259      | 1.46872                     | 5.18527      | 5.31411           |
| YBR045C   | 2.99914   | 2.71003      | 3.12905                     | 6.7683       | 7.13104           |
| YBR047W   | 21.3166   | 26.2106      | 25.4722                     | 48.9828      | 47.8333           |
| YBR054W   | 44.3476   | 78.1997      | 119.384                     | 137.334      | 111.942           |
| YBR085C-A | 249.554   | 443.763      | 465.572                     | 447.6        | 482.96            |
| YBR105C   | 49.3838   | 64.174       | 57.2734                     | 84.7269      | 114.254           |
| YBR200W-A | 0         | 0            | 5.20344                     | 94.902       | 98.6069           |
| YBR285W   | 5.24807   | 5.28344      | 7.13844                     | 11.9559      | 13.2688           |
| YBR296C   | 10.9046   | 11.897       | 11.3972                     | 24.5847      | 27.9867           |
| YCL007C   | 8.77824   | 17.3507      | 17.9056                     | 19.9453      | 22.1662           |
| YCL048W   | 0.947571  | 0.480868     | 0.538413                    | 2.11534      | 2.64763           |
| YCL073C   | 0.0732457 | 0.203942     | 0.279345                    | 0.329608     | 3.20059           |
| YCL074W   | 0         | 0            | 0                           | 0.108657     | 2.80729           |
| YCL075W   | 0         | 0            | 0                           | 0.331635     | 1.61445           |
| YDL199C   | 4.16978   | 4.98112      | 6.22796                     | 8.16005      | 7.99161           |
| YDL209C   | 19.2606   | 20.225       | 17.964                      | 35.0865      | 35.4292           |
| YDL211C   | 10.6814   | 11.1927      | 12.8084                     | 20.328       | 21.7369           |
| YDL244W   | 1.78802   | 1.92674      | 2.13026                     | 3.9146       | 4.72105           |
| YDL245C   | 4.75461   | 4.58043      | 4.50911                     | 9.23865      | 9.08407           |
| YDR018C   | 3.10313   | 4.03393      | 3.67111                     | 6.34389      | 7.07058           |
| YDR034C-A | 1226.15   | 1297.14      | 1347.88                     | 1817.64      | 2113.44           |
| YDR059C   | 54.135    | 60.8859      | 56.0056                     | 81.0914      | 95.1514           |
| YDR191W   | 9.42849   | 7.99911      | 8.87936                     | 18.375       | 18.7481           |
| YDR218C   | 0.856855  | 1.01749      | 0.714749                    | 3.25919      | 4.06426           |
| YDR230W   | 14.0763   | 18.1851      | 22.2932                     | 30.2931      | 32.685            |
| YDR231C   | 37.7273   | 46.7323      | 42.4358                     | 67.7876      | 65.5079           |

|           |          |          |          |          |         |
|-----------|----------|----------|----------|----------|---------|
| YDR402C   | 2.27634  | 2.53012  | 2.29242  | 4.93776  | 4.90666 |
| YDR403W   | 2.88797  | 2.86585  | 3.56296  | 8.76687  | 10.0129 |
| YDR446W   | 0.517483 | 0.61351  | 0.268193 | 1.49318  | 2.3629  |
| YDR491C   | 33.5056  | 34.1142  | 28.905   | 65.5225  | 62.4213 |
| YDR523C   | 2.50579  | 2.07459  | 2.01369  | 5.20145  | 5.31918 |
| YDR528W   | 21.7206  | 18.1265  | 19.1207  | 46.0636  | 44.4086 |
| YDR534C   | 13.4155  | 19.4268  | 19.1279  | 22.6977  | 58.0149 |
| YEL039C   | 8.51484  | 5.60808  | 9.74282  | 19.704   | 19.3413 |
| YEL059C-A | 65.2756  | 76.5132  | 87.9942  | 209.971  | 190.279 |
| YEL065W   | 182.666  | 171.987  | 178.539  | 222.281  | 315.459 |
| YEL070W   | 1.14924  | 1.85512  | 1.29543  | 4.89042  | 5.35383 |
| YER084W   | 2.51291  | 1.74259  | 3.61692  | 11.5775  | 11.1411 |
| YER095W   | 72.0812  | 71.7094  | 75.9737  | 96.357   | 125.03  |
| YER096W   | 3.08994  | 2.71897  | 3.23377  | 8.03561  | 9.05107 |
| YER106W   | 1.20497  | 0.645073 | 1.19335  | 3.8146   | 3.92461 |
| YER188W   | 9.24782  | 13.0046  | 14.9892  | 11.3208  | 17.2167 |
| YFL011W   | 0.754899 | 0.578687 | 0.749684 | 3.13547  | 3.29548 |
| YFL012W   | 2.58046  | 1.75166  | 2.19035  | 10.1311  | 9.9746  |
| YFL014W   | 46.9638  | 70.6051  | 73.0639  | 91.8058  | 127.369 |
| YFL020C   | 6.35546  | 10.2559  | 8.84675  | 12.9034  | 18.1965 |
| YFL058W   | 0.703261 | 0.679616 | 0.66298  | 2.48214  | 3.74747 |
| YFL067W   | 19.5435  | 24.0224  | 18.8999  | 32.3933  | 41.104  |
| YFR023W   | 0.371344 | 0.339371 | 0.33009  | 4.1315   | 3.53309 |
| YFR032C   | 1.90807  | 1.28785  | 2.05305  | 3.82883  | 4.11159 |
| YFR057W   | 0        | 0        | 0        | 0.986025 | 6.56954 |
| YGL121C   | 17.4201  | 17.8263  | 22.1511  | 31.8153  | 31.1316 |
| YGL156W   | 7.14296  | 7.35574  | 8.76017  | 12.0707  | 13.1193 |
| YGL158W   | 1.81103  | 1.35374  | 1.43246  | 4.04129  | 3.86509 |
| YGL175C   | 5.44795  | 7.26731  | 8.06786  | 10.6928  | 11.9245 |
| YGL184C   | 1.98302  | 2.03814  | 1.78824  | 4.99338  | 5.411   |
| YGL204C   | 80.4343  | 73.1816  | 73.889   | 129.712  | 142.476 |
| YGL209W   | 58.3768  | 62.6767  | 53.3504  | 152.203  | 179.189 |
| YGL259W   | 1.86515  | 2.02329  | 4.88985  | 5.36478  | 8.03206 |
| YGL262W   | 0.302209 | 0.832665 | 0.203099 | 3.6659   | 5.48642 |
| YGL263W   | 1.85623  | 7.06358  | 2.49492  | 7.52776  | 24.708  |
| YGR023W   | 6.61009  | 10.4791  | 13.2167  | 14.5101  | 15.4255 |
| YGR032W   | 19.0455  | 21.1635  | 22.0555  | 25.5515  | 39.3248 |
| YGR035C   | 117.11   | 79.5549  | 67.7712  | 227.298  | 240.171 |
| YGR043C   | 5.30165  | 5.7293   | 6.38184  | 10.0744  | 11.0587 |
| YGR052W   | 3.17189  | 6.58117  | 10.4271  | 8.54093  | 7.99948 |
| YGR059W   | 0.981812 | 0.881018 | 0.655095 | 3.01131  | 3.20868 |
| YGR079W   | 64.0307  | 40.2903  | 35.4731  | 145.313  | 173.453 |
| YGR087C   | 1.03812  | 0.973788 | 0.787617 | 5.08569  | 5.8263  |
| YGR131W   | 9.80283  | 11.7554  | 10.2393  | 16.1672  | 18.8524 |
| YGR144W   | 5.40007  | 5.63136  | 6.31839  | 12.8073  | 12.4957 |
| YGR146C   | 87.5289  | 106.812  | 106.174  | 158.699  | 210.835 |
| YGR225W   | 0.737461 | 0.682236 | 0.845069 | 2.17371  | 2.16725 |

|           |          |          |          |         |         |
|-----------|----------|----------|----------|---------|---------|
| YGR260W   | 213.697  | 214.148  | 218.115  | 391.387 | 468.021 |
| YHL029C   | 32.0009  | 33.896   | 36.1076  | 56.8251 | 59.4804 |
| YHL036W   | 2.00986  | 3.82624  | 6.71758  | 13.314  | 15.3618 |
| YHL044W   | 13.2287  | 16.3786  | 16.0588  | 24.2689 | 23.2462 |
| YHR015W   | 2.67077  | 2.4201   | 2.81366  | 6.9597  | 6.06345 |
| YHR054C   | 23.4016  | 21.0784  | 25.1729  | 44.9702 | 43.8387 |
| YHR061C   | 20.7853  | 23.0727  | 23.9186  | 33.8782 | 36.2449 |
| YHR126C   | 0        | 0.273576 | 0.577326 | 4.46947 | 4.38922 |
| YHR151C   | 19.9228  | 19.8546  | 18.3766  | 39.1053 | 40.5671 |
| YHR171W   | 8.17131  | 7.90125  | 9.14438  | 14.791  | 15.9591 |
| YHR185C   | 0.226901 | 0.292613 | 0.311996 | 1.99634 | 2.37593 |
| YHR218W   | 4.93113  | 4.98225  | 5.90342  | 5.96023 | 9.4257  |
| YIL006W   | 5.61207  | 9.12768  | 10.2958  | 18.3376 | 19.6992 |
| YIL011W   | 37.3382  | 37.9168  | 38.3751  | 72.1217 | 79.7029 |
| YIL042C   | 12.1848  | 16.966   | 18.3448  | 27.0388 | 32.2771 |
| YIL066C   | 3.90209  | 4.13731  | 4.4431   | 7.98639 | 9.30262 |
| YIL099W   | 2.41591  | 2.45145  | 2.24507  | 5.77471 | 9.38728 |
| YIL113W   | 6.14059  | 8.30624  | 11.8188  | 11.0259 | 12.1177 |
| YIR013C   | 2.49116  | 1.48274  | 0.855434 | 5.00201 | 9.91977 |
| YIR014W   | 7.05463  | 9.11004  | 9.2156   | 14.5654 | 15.6917 |
| YIR017W-A | 3.33234  | 4.08716  | 4.05675  | 9.78813 | 9.79062 |
| YIR019C   | 3.1765   | 4.09158  | 4.32076  | 6.09407 | 7.09832 |
| YIR027C   | 2.83553  | 2.0774   | 3.34633  | 7.26534 | 7.88925 |
| YIR039C   | 3.51415  | 3.70734  | 6.27387  | 9.44376 | 11.2988 |
| YIR042C   | 7.02464  | 11.1111  | 16.4351  | 13.6302 | 15.4937 |
| YIR043C   | 1.77471  | 2.8512   | 5.15311  | 4.14019 | 8.94425 |
| YJL037W   | 1.60259  | 1.64912  | 1.845    | 7.26388 | 8.56514 |
| YJL038C   | 9.05712  | 7.7669   | 8.87208  | 27.6379 | 29.0873 |
| YJL045W   | 2.1692   | 2.17328  | 2.02678  | 5.46944 | 5.75208 |
| YJL088W   | 5.98601  | 5.08754  | 3.8434   | 12.0564 | 12.9291 |
| YJL116C   | 21.2222  | 25.9489  | 25.2233  | 32.7554 | 46.5445 |
| YJL163C   | 7.43297  | 8.29816  | 9.23969  | 14.588  | 15.0631 |
| YJL194W   | 9.65256  | 8.61752  | 8.55512  | 26.4025 | 27.6353 |
| YJL219W   | 2.55743  | 3.10063  | 2.38238  | 5.4313  | 6.24199 |
| YJL221C   | 2.35312  | 2.6833   | 2.85373  | 5.25766 | 5.00277 |
| YJR078W   | 3.05035  | 2.44567  | 2.37824  | 14.7145 | 14.9836 |
| YJR097W   | 48.7728  | 39.5712  | 30.858   | 79.7792 | 84.7264 |
| YJR158W   | 3.16883  | 2.81635  | 3.26367  | 5.81926 | 6.12788 |
| YKL162C   | 6.41942  | 6.53954  | 6.95494  | 12.5248 | 12.0283 |
| YKL163W   | 7.24612  | 9.06656  | 8.49235  | 11.7494 | 14.0965 |
| YKR011C   | 50.3446  | 59.0258  | 62.0473  | 85.4662 | 86.7515 |
| YKR034W   | 0.349479 | 0.690523 | 0.58562  | 3.41094 | 3.22852 |
| YKR039W   | 11.9769  | 11.8627  | 12.9452  | 26.8859 | 23.3448 |
| YKR102W   | 4.02058  | 4.24601  | 4.82362  | 7.70354 | 8.83959 |
| YKR106W   | 2.54591  | 4.32289  | 5.23347  | 4.84096 | 5.57472 |
| YLL025W   | 9.59296  | 14.1634  | 11.6401  | 15.2637 | 19.8668 |
| YLL046C   | 0.733465 | 0.684601 | 1.29863  | 3.04922 | 3.07317 |

|           |          |          |           |         |         |
|-----------|----------|----------|-----------|---------|---------|
| YLL052C   | 31.7695  | 33.5847  | 32.1547   | 48.5226 | 61.007  |
| YLL053C   | 37.1049  | 41.8159  | 43.3658   | 60.1258 | 78.6949 |
| YLR013W   | 0        | 0.166102 | 0         | 1.45465 | 2.06326 |
| YLR094C   | 25.5032  | 25.9817  | 26.6232   | 43.8107 | 47.9846 |
| YLR107W   | 36.4677  | 37.1665  | 38.4847   | 61.5702 | 69.7643 |
| YLR108C   | 21.5127  | 20.4678  | 19.9764   | 45.5951 | 50.6643 |
| YLR142W   | 4.82861  | 5.78515  | 6.67346   | 8.26826 | 9.4791  |
| YLR149C   | 4.15427  | 4.73267  | 5.14628   | 7.18943 | 7.77618 |
| YLR205C   | 17.2288  | 15.9411  | 16.0059   | 26.3485 | 43.409  |
| YLR307C-A | 0        | 1.22156  | 2.07527   | 16.5622 | 21.9909 |
| YLR307W   | 1.29255  | 1.09213  | 1.13144   | 13.7947 | 13.8625 |
| YLR312C   | 1.76155  | 1.26337  | 1.65167   | 4.52624 | 3.93251 |
| YLR346C   | 25.6379  | 34.4823  | 39.9503   | 49.3604 | 47.8132 |
| YLR356W   | 42.8543  | 45.8643  | 43.5308   | 73.7038 | 81.9767 |
| YML027W   | 37.4517  | 30.1713  | 29.7402   | 60.9226 | 65.3345 |
| YML043C   | 31.4433  | 25.6724  | 22.3086   | 60.2597 | 63.8319 |
| YML058W-A | 250.104  | 279.032  | 375.287   | 1573.39 | 2554.22 |
| YML116W   | 29.4452  | 28.6529  | 28.753    | 50.6432 | 61.4929 |
| YMR034C   | 7.87566  | 9.58207  | 11.8907   | 17.0057 | 17.9055 |
| YMR085W   | 2.97704  | 3.09258  | 3.69159   | 5.95951 | 5.84854 |
| YMR101C   | 1.20988  | 1.24935  | 1.26306   | 4.50825 | 4.36997 |
| YMR120C   | 54.0657  | 43.806   | 37.0736   | 101.127 | 93.8788 |
| YMR122C   | 11.5226  | 11.7056  | 13.8128   | 22.4698 | 25.8851 |
| YMR136W   | 12.8566  | 15.613   | 18.3811   | 21.5356 | 23.4101 |
| YMR141C   | 31.0584  | 26.998   | 38.2627   | 48.0965 | 54.8989 |
| YMR206W   | 2.37289  | 4.03749  | 3.23532   | 4.60834 | 5.17874 |
| YMR244W   | 1.87204  | 1.07161  | 1.44537   | 7.98412 | 7.96361 |
| YMR323W   | 0.189814 | 0.150608 | 0.0779624 | 1.1745  | 2.83346 |
| YNL018C   | 1.97809  | 1.35914  | 1.30145   | 5.07357 | 5.32193 |
| YNL034W   | 1.42603  | 0.90957  | 1.11467   | 2.85578 | 3.81353 |
| YNL065W   | 77.2841  | 76.5062  | 66.7039   | 158.028 | 204.728 |
| YNL202W   | 13.0762  | 12.5795  | 11.506    | 21.1643 | 23.4912 |
| YNL311C   | 13.0459  | 11.4545  | 12.3924   | 21.6    | 23.1595 |
| YNL332W   | 1.65134  | 1.84542  | 1.33056   | 4.26839 | 5.3193  |
| YNR064C   | 11.0307  | 11.5816  | 9.66717   | 27.5251 | 36.0053 |
| YNR071C   | 3.91144  | 3.85212  | 3.18879   | 7.43017 | 7.93845 |
| YNR073C   | 3.01979  | 3.60464  | 3.71286   | 6.71154 | 7.33169 |
| YOL024W   | 1.78201  | 1.85895  | 1.58312   | 6.81176 | 5.91012 |
| YOL047C   | 3.06813  | 3.87115  | 4.09888   | 7.70734 | 8.96954 |
| YOL058W   | 36.9678  | 35.2219  | 32.1246   | 61.4781 | 68.8    |
| YOL083W   | 8.63942  | 9.00653  | 11.2051   | 15.2011 | 16.5622 |
| YOL084W   | 0.933572 | 1.01906  | 1.36993   | 2.42404 | 2.52648 |
| YOL118C   | 20.2298  | 22.0746  | 14.961    | 35.5229 | 38.1591 |
| YOL126C   | 78.0088  | 98.4738  | 95.7408   | 179.332 | 202.711 |
| YOL132W   | 2.41606  | 2.396    | 2.54071   | 6.259   | 6.93241 |
| YOL162W   | 2.52149  | 3.0534   | 2.9892    | 6.76708 | 7.2288  |
| YOL163W   | 6.24245  | 5.25221  | 7.26896   | 10.097  | 13.1081 |

|           |          |           |          |           |           |
|-----------|----------|-----------|----------|-----------|-----------|
| YOR020W-A | 169.728  | 199.437   | 219.786  | 308.044   | 291.881   |
| YOR062C   | 8.53486  | 14.2408   | 16.2923  | 16.1286   | 18.1808   |
| YOR066W   | 20.612   | 24.6317   | 25.829   | 33.8919   | 35.9245   |
| YOR208W   | 12.7318  | 11.8909   | 14.8179  | 20.4469   | 23.182    |
| YOR237W   | 3.90874  | 3.29102   | 3.72043  | 6.46062   | 8.09683   |
| YOR242C   | 2.64268  | 3.44803   | 3.52802  | 4.65876   | 5.52541   |
| YOR338W   | 13.9784  | 16.4486   | 14.7744  | 37.0195   | 56.2758   |
| YOR388C   | 2.45225  | 2.32298   | 2.31352  | 5.54017   | 5.886     |
| YOR391C   | 0.444721 | 0.263393  | 0.432521 | 2.97084   | 2.96174   |
| YOR393W   | 0.585543 | 0.357541  | 0.461932 | 1.96796   | 2.69752   |
| YPL026C   | 28.6271  | 28.5434   | 29.0604  | 44.986    | 49.4226   |
| YPL033C   | 0.588773 | 0.544182  | 0.259665 | 2.05171   | 2.68917   |
| YPL171C   | 3.54777  | 4.05858   | 4.10919  | 8.46389   | 9.60676   |
| YPL187W   | 1.18503  | 2.86225   | 2.21805  | 6.70915   | 8.83258   |
| YPL229W   | 35.8524  | 33.6616   | 38.0247  | 58.0968   | 68.7159   |
| YPL250C   | 39.7813  | 54.6646   | 52.168   | 66.0791   | 70.6897   |
| YPL275W   | 3.9344   | 3.09794   | 3.79308  | 7.33218   | 7.58688   |
| YPL281C   | 0.585543 | 0.357541  | 0.461932 | 1.96796   | 2.69752   |
| YPR015C   | 4.00272  | 6.7352    | 7.41415  | 9.90971   | 11.4583   |
| YPR061C   | 8.89411  | 10.2381   | 11.5206  | 17.8288   | 20.7578   |
| YPR078C   | 3.00428  | 2.2895    | 2.58557  | 5.55329   | 7.10555   |
| YPR151C   | 2.71037  | 4.0494    | 4.19363  | 6.86095   | 6.56916   |
| RUF20     | 12.7314  | 9.75402   | 8.78011  | 8.47721   | 6.06904   |
| SRG1      | 175.278  | 146.472   | 149.068  | 100.407   | 85.2592   |
| YBL002W   | 2768.61  | 2839.12   | 2942.47  | 1224.34   | 1108.86   |
| YBL003C   | 1997.51  | 2193.77   | 2134.34  | 1055.68   | 890.568   |
| YBR009C   | 3920.62  | 4574.91   | 4690.17  | 2576.87   | 2189.69   |
| YDL041W   | 69.4875  | 34.3356   | 51.197   | 43.9135   | 23.4687   |
| YDL043C   | 48.9573  | 36.0846   | 45.2967  | 33.3765   | 22.0962   |
| YDR174W   | 415.184  | 325.575   | 365.861  | 310.312   | 224.443   |
| YDR342C   | 79.5435  | 80.5689   | 79.4411  | 50.5972   | 39.9787   |
| YDR343C   | 65.9717  | 68.0299   | 67.2987  | 44.2814   | 35.2372   |
| YDR414C   | 63.0187  | 58.096    | 57.9452  | 34.4446   | 35.5048   |
| YDR538W   | 65.4854  | 63.1761   | 57.5127  | 34.3013   | 33.0862   |
| YDR539W   | 57.7393  | 56.5933   | 59.4737  | 34.3752   | 32.9411   |
| YFL034C-A | 763.361  | 642.976   | 683.569  | 511.383   | 433.79    |
| YGL143C   | 29.9477  | 32.6421   | 34.6653  | 16.8067   | 16.0581   |
| YGR017W   | 134.582  | 137.215   | 132.299  | 83.0637   | 73.657    |
| YGR018C   | 390.285  | 384.992   | 366.965  | 221.389   | 210.549   |
| YHR057C   | 145.278  | 150.986   | 149.074  | 91.4859   | 81.5692   |
| YHR119W   | 24.3045  | 24.1867   | 24.4623  | 0.0328135 | 0.0323625 |
| YHR128W   | 349.515  | 325.462   | 338.052  | 201.711   | 179.068   |
| YHR207C   | 34.5605  | 0.0544822 | 42.426   | 37.8453   | 0.0167172 |
| YIL121W   | 83.0233  | 87.3054   | 89.2951  | 45.8328   | 34.9588   |
| YIL132C   | 21.2558  | 15.293    | 17.6227  | 15.1495   | 10.891    |
| YJL144W   | 36.7865  | 98.9025   | 118.753  | 17.2363   | 17.7915   |
| YJR069C   | 203.606  | 192.86    | 185.308  | 127.409   | 119.115   |

|           |         |         |         |         |         |
|-----------|---------|---------|---------|---------|---------|
| YKL096W-A | 17221.8 | 16299.4 | 16252.1 | 12038.8 | 9351.04 |
| YKL109W   | 47.4642 | 89.8738 | 107.698 | 27.3481 | 27.4932 |
| YKL120W   | 232.776 | 221.286 | 205.754 | 145.334 | 128.709 |
| YKL138C-A | 467.75  | 484.89  | 410.154 | 288.436 | 260.668 |
| YLR031W   | 18.4678 | 15.3603 | 18.8714 | 12.6967 | 10.3379 |
| YLR040C   | 45.0325 | 42.1747 | 41.9775 | 21.1968 | 20.0808 |
| YLR064W   | 144.167 | 149.896 | 150.028 | 70.7358 | 78.7081 |
| YLR327C   | 139.669 | 201.96  | 217.803 | 68.4559 | 80.3015 |
| YLR446W   | 25.5962 | 20.715  | 21.8314 | 10.105  | 10.0738 |
| YMR158W   | 125.597 | 108.457 | 113.178 | 85.1582 | 71.7534 |
| YMR173W   | 233.695 | 271.381 | 284.08  | 151.156 | 127.732 |
| YMR173W-A | 124.904 | 134.839 | 141.406 | 71.6704 | 63.4418 |
| YNL030W   | 3759.5  | 4651.15 | 4787.32 | 2306.16 | 2029.77 |
| YNL031C   | 3324.07 | 3704.04 | 3926.49 | 2129.99 | 1943.41 |
| YNL040W   | 37.6617 | 35.6749 | 35.6112 | 18.8131 | 18.2432 |
| YNL281W   | 498.567 | 522.837 | 518.913 | 278.659 | 259.093 |
| YOL014W   | 79.9811 | 252.229 | 303.09  | 47.1364 | 39.7611 |
| YOR111W   | 35.2239 | 34.1529 | 36.2452 | 22.5699 | 19.7839 |
| YOR153W   | 230.734 | 288.569 | 279.115 | 125.236 | 128.066 |
| YOR289W   | 13.7972 | 19.1997 | 18.3002 | 8.03415 | 6.36568 |
| YOR298C-A | 1209.45 | 1541.29 | 1562.46 | 784.086 | 704.137 |
| YOR315W   | 219.385 | 194.083 | 178.522 | 156.78  | 123.996 |
| YPL197C   | 459.625 | 380.914 | 389.219 | 334.073 | 247.169 |
| snR49     | 1025.5  | 781.549 | 747.486 | 672.293 | 595.139 |

## Supplementary References

1. Carr M, Bensasson D, Bergman CM. Evolutionary genomics of transposable elements in *Saccharomyces cerevisiae*. PLoS One 2012, 7:e50978.
2. Kim JM, Vanguri S, Boeke JD, Gabriel A, Voytas DF. Transposable elements and genome organization: a comprehensive survey of retrotransposons revealed by the complete *Saccharomyces cerevisiae* genome sequence. Genome Res 1998, 8:464-78.
3. Collins SR, Schuldiner M, Krogan NJ, Weissman JS. A strategy for extracting and analyzing large-scale quantitative epistatic interaction data. Genome Biol 2006, 7:R63.



4. Schuldiner M, Collins SR, Weissman JS, Krogan NJ. Quantitative genetic analysis in *Saccharomyces cerevisiae* using epistatic miniarray profiles (E-MAPs) and its application to chromatin functions. *Methods* 2006, 40:344-52.
5. Collins SR, Miller KM, Maas NL, Roguev A, Fillingham J, Chu CS, Schuldiner M, Gebbia M, Recht J, Shales M, et al. Functional dissection of protein complexes involved in yeast chromosome biology using a genetic interaction map. *Nature* 2007, 446:806-10.

**Table S7.** List of transposable elements validated by RT-PCR in Figure 3E

| Primer set | MIPS annotation*                                                                           | Ty element                                                                                           | ORF(s) targeted                                                                                    | UPL Probe | Forward primer            | Reverse primer              |
|------------|--------------------------------------------------------------------------------------------|------------------------------------------------------------------------------------------------------|----------------------------------------------------------------------------------------------------|-----------|---------------------------|-----------------------------|
| <b>A</b>   | TY2B_DR1                                                                                   | YDRCTy2-1                                                                                            | YDR034C-D                                                                                          | 25        | TGCAGATTCC CTTTATGGATT    | AGGCGCTACC ATGAAGATTG       |
| <b>B</b>   | TY1B_ER1<br>TY1B_JR1                                                                       | YERCTy1-1<br>YJRWTy1-1                                                                               | YER138C<br>YJR027W                                                                                 | 72        | GAACAATAAG CACGACCTTC ACT | TCAGAATGAT TAGTGTGATT TACCG |
| <b>C</b>   | TY1B_LR1<br>TY1B_H<br>TY1B_ER2                                                             | YLRCdelta2<br>YLRCdelta3<br>YHRCTy1-1<br>YERCTy1-2                                                   | YLR035C-A<br>YHR214C-B<br>YER160C                                                                  | 6         | TCACTACACC ACGTCGTTCC     | GGAGTGGGAAG ATCAGCGATA A    |
| <b>D</b>   | TY1B_PR3<br>TY1A_PR3                                                                       | YPRCTy1-4                                                                                            | YPR158C-D<br>YPR158C-C                                                                             | 77        | CATTACTGA TTCATCCTCA GCA  | CCCAATTTGG AAAGTCATTA GG    |
| <b>E</b>   | TY1B_PR3<br>TY1B_PL<br>TY1B_OL<br>TY1B_ML1<br>TY1B_LR3<br>TY1B_LR2<br>TY1B_GR1<br>TY1B_DR6 | YPRCTy1-4<br>YPLWTy1-1<br>YOLWTy1-1<br>YMLWTy1-2<br>YLRWTy1-2<br>YLRCTy1-1<br>YGRWTy1-1<br>YDRWTy1-5 | YPR158C-D<br>YPL257W-B<br>YOL103W-B<br>YML039W<br>YLR227W-B<br>YLR157C-B<br>YGR027W-B<br>YDR365W-B | 72        | ACAATAAGCA CGACCTTCAC C   | TCAGAATGAT TAGTGTGATT TACCG |

Due to sequence homology, each primer set (labeled **A–E**) amplifies the indicated ORFs. Ty elements are named according to MIPS annotation (\*Munich Information Center for Protein Sequences [<http://mips.gsf.de/genre/proj/yeast/>]).

**Table S8.** Telomere proximal genes tested by qRT-PCR in Figure 2C and D; Figure S3

| Telomere | Systematic name | ORF     | UPL Probe | Forward primer                      | Reverse primer               |
|----------|-----------------|---------|-----------|-------------------------------------|------------------------------|
| TEL07L   | YGL263W         | COS12   | 48        | CATTACAAAT ACTCCGGGTA TAGACA        | GCAGCTGGAA CCATCAAAA         |
| TEL07L   | YGL262W         | YGL262W | 56        | GAGAATTACT CTGACATTGG AGATGA        | TTGTCATTAC AGAAGCCATC AAC    |
| TEL07L   | YGL258W         | VEL1    | 9         | GCCGACGTCT TGACTGAAAG               | TGTTTCCTGG CCCAAATATC        |
| TEL07L   | YGL257C         | MNT2    | 66        | CAAAGTAGCA GCAGTGGCAA T             | ACCCAGGCGT AAGACCTTC         |
| TEL07L   | YGL256W         | ADH4    | 78        | TGGCTATCAT TGACAACAAC G             | CCAAACATGG TAGATGGATC G      |
| TEL07L   | YGL255W         | ZRT1    | 9         | GATCGGTCTA AACCTGGGAA G             | CACTAAGACAGGGTATAGGGAGGA     |
| TEL02L   | YBL113C         | YBL113C | 29        | CTTGGATTTC GGTCTGACG                | CACAGAGCCC GAACATCTTT        |
| TEL02L   | YBL109W         | YBL109W | 42        | TCCCTACGGC CTTGTCTAAC               | GACAGGTTGG AAGGGTTGAA        |
| TEL02L   | YBL107C         | MIC23   | 34        | CGAACTGGCA AATACGGAAT               | TGATCGGTCT CGTTCCTCAT C      |
| TEL02L   | YBL104C         | SEA4    | 16        | GCGTATAAGG ATCTGCCAGG TA            | CGGAGGACAT TTTTCTGCAT        |
| TEL02L   | YBL101C         | ECM21   | 2         | CATGAGCTCA CATCAACTGA AAA           | TTGGATACTC TGCGAAAATG TC     |
| Control  | YBR123C         | TFC1    | 62        | GCTGGCACTC ATATCTTATC GTTTCACAAT GG | GAACCTGCTG TCAATACCGC CTGGAG |



**Table S9.** List of ORFs and Ty elements validated by qRT-PCR in Figure 3A and B; Figure S5

| ORF                         | Systematic name        | UPL Probe | Forward primer                | Reverse primer               |
|-----------------------------|------------------------|-----------|-------------------------------|------------------------------|
| KCS1                        | YDR017C                | 35        | GATAAAGAAG GCGAGCAAGC         | GGATATTCCC TATGTTCAAT ATCACC |
| LYS14                       | YDR034C                | 78        | GTCCCCACCG GGTAGTTATC         | TTTGTGAACG ATGAACCACT G      |
| YDRCTy2-1<br>(Primer set A) | YDR034C-D              | 25        | TGCAGATTCC CTTTTATGGA TT      | AGGCGCTACC ATGAAGATTG        |
| ARO3                        | YDR035W                | 53        | TGAAGGTAGA CAAGATATTC CAAA    | AGCATCCGTA ACAGAACAAC C      |
| EHD3                        | YDR036C                | 2         | ACTCACAAAT GGCCCTGTAT CT      | AAGCGTCTGC TCCTGTGACT        |
| BAP3                        | YDR046C                | 8         | GCGACCCTGG TTCATTG            | TATAACATAT CCCTTTGAAA CGAGTG |
| ASN1                        | YPR145W                | 2         | TCTAAGGAAG GCATTGACA C        | TCTTCTGGTA AATATGGCTT AGCA   |
| CUR1                        | YPR158W                | 15        | ACAATCAGAT AGAAGAATTG AATGACA | CTTCCTTTTT GATGATACTT TCTTGA |
| YPRCTy1-4<br>(Primer set D) | YPR158C-D<br>YPR158C-C | 77        | CATTACTGA TTCATCCTCA GCA      | CCCAATTGG AAAGTCATTA GG      |
| KRE6                        | YPR159W                | 50        | TCATCCGAAT CAAGGTGTTG         | AGTTTCACCT TCCAAAACAT CAA    |
| SGV1                        | YPR161C                | 42        | CATTCACCGG ATATTACAAA TGC     | CGGCAGGATC ATGTAGAATG        |
| MET16                       | YPR167C                | 16        | TAAGCCGGAT GGATGTGAA          | TCCCATAAGA AATCCCCGTA        |

The Ty elements YDRCTy2-1 and YPRCTy1-4 correspond to primer sets **A** and **D**, respectively, in Figure 3E.
